# Supplementary material for: Gold(i)-catalysed [2+4] cycloaddition of 1,1-difluoroallenes with conjugated enones: synthesis of ring-difluorinated dihydro-2H-pyrans
Source: Royal Society of Chemistry journal article supplement (doi:10.1039/d4cc06642a), 2025-01-01

# Gold(I)-Catalyzed [2+4] Cycloaddition of 1,1-Difluoroallenes with Conjugated Enones: Syntheses of Ring-Difluorinated Dihydro-2*H*-Pyrans

Daisuke Miyazaki,<sup>1</sup> Reo Eto,<sup>1</sup> Junji Ichikawa,<sup>2</sup> and Kohei Fuchibe<sup>1\*</sup>

kfuchibe@chem.tsukuba.ac.jp,<sup>1</sup> jichikawa@sagami.or.jp<sup>2</sup>

Division of Chemistry, Faculty of Pure and Applied Sciences  
University of Tsukuba, Tsukuba, Ibaraki 305–8571, Japan<sup>1</sup>

Sagami Chemical Research Institute, 2743-1 Hayakawa  
Ayase, Kanagawa 252–1193, Japan<sup>2</sup>

## — *Supporting Information* —

### Table of Contents

|                              |       |            |
|------------------------------|-------|------------|
| 1. General Statements        | ..... | <b>S2</b>  |
| 2. Typical Procedures        | ..... | <b>S3</b>  |
| 3. Spectral Data of Products | ..... | <b>S4</b>  |
| 4. NMR Spectra of Products   | ..... | <b>S11</b> |

## 1. General Statements

### 1-1. Solvents and Reagents

Superdry THF, dichloromethane and DMF were purchased from Kanto Chemical Co., Inc. and used as received. 1,2-Dichloroethane was distilled from P<sub>4</sub>O<sub>10</sub> and from CaH<sub>2</sub> sequentially, and then stored over MS 4A.

AuCl, AuCl<sub>3</sub> and AuCl(IPr) were purchased from Merck KGaA and used as received. AuCl(PPh<sub>3</sub>) was purchased from FUJIFILM Wako Pure Chemical Co., Ltd. and used as received. AgSbF<sub>6</sub> was purchased from Tokyo Chemical Industry Co., Ltd. and used as received. Molecular sieves 4A was purchased from Merck KGaA, dried under microwave irradiation (3 min), and further flame-dried in a reaction vessel just before use.

$\alpha,\alpha,\alpha$ -Trifluorotoluene (an internal standard for <sup>19</sup>F NMR quantitative analysis) was purchased from Tokyo Chemical Industry Co., Ltd. and used as received.

1,1-Difluoroallenes **1a–c** were prepared by our reported method.<sup>[1]</sup> The spectral data of 1,1-difluoroallenes **1a–c** were provided in our previous publication.<sup>[1b]</sup>

### 1-2. Purification

Column chromatography was conducted on silica gel (Silica Gel 60 N, Kanto Chemical Co., Inc.). Preparative thin-layer chromatography was conducted on silica gel (Wakogel B-5F, FUJIFILM Wako Pure Chemical Corporation).

### 1-3. Analyses

IR spectra were recorded on a JASCO FT/IR-4100 spectrometer. NMR spectra were recorded on a Bruker Avance 500 spectrometer in CDCl<sub>3</sub> at 500 MHz (<sup>1</sup>H NMR), at 126 MHz (<sup>13</sup>C NMR) and at 471 MHz (<sup>19</sup>F NMR). Chemical shifts were given in ppm relative to internal Me<sub>4</sub>Si (for <sup>1</sup>H NMR:  $\delta$  = 0.00), CDCl<sub>3</sub> (for <sup>13</sup>C NMR:  $\delta$  = 77.0) and C<sub>6</sub>F<sub>6</sub> (for <sup>19</sup>F NMR:  $\delta$  = 0.0; C<sub>6</sub>F<sub>6</sub> exhibits a <sup>19</sup>F NMR signal at –162.9 ppm vs. CFCl<sub>3</sub>). Elemental analyses (EA) were performed with a Yanako MT-3 CHN Corder apparatus. High-resolution mass spectroscopy (HRMS) was conducted with a Jeol JMS-T100GCV (EI, TOF) spectrometer.

---

<sup>[1]</sup> a) Fuchibe, K.; Abe, M.; Oh, K.; Ichikawa, J. *Org. Synth.* **2016**, *93*, 352–366; b) Oh, K.; Fuchibe, K.; Ichikawa, J. *Synthesis* **2011**, *2011*, 881–886.

## 2. Typical Procedures

### 2-1. Synthesis of (*E*)-3-Alkylidene-2,2-Difluorodihydro-2*H*-Pyrans

To a flame-dried molecular sieves 4A (401 mg) were added *trans*-chalcone **2d** (218 mg, 1.05 mmol), AuCl(IPr) (12 mg, 0.020 mmol), AgSbF<sub>6</sub> (0.007 mg, 0.019 mmol), and 1,2-dichloroethane (4 mL). After stirring for 10 min at room temperature, white precipitates were observed. To the resulting suspension was added a 1,2-dichloroethane solution (1 mL) of 1,1-difluoroallene **1a** (186 mg, 1.03 mmol) at room temperature. After stirring for 1 h at room temperature, the reaction mixture was passed through a small pad of silica gel using dichloromethane as an eluent. After removal of solvent under reduced pressure, the residue was purified by column chromatography on silica gel (hexane/AcOEt = 30:1) to give difluorodihydropyran **3f** (399 mg, quantitative) as a colorless liquid.

### 3. Spectral Data of Products

#### 3-1. (*E*)-2,2-Difluoro-6-methyl-4-phenyl-3-(3-phenylpropan-1-ylidene)-3,4-dihydro-2*H*-pyran **3a**

Synthesized from 1,1-difluoroallene **1a** (54 mg, 0.30 mmol), *trans*-benzalacetone **2a** (45 mg, 0.31 mmol), AuCl(IPr) (3.4 mg, 0.006 mmol), AgSbF<sub>6</sub> (2.0 mg, 0.006 mmol) and MS 4A (119 mg).

Purified by column chromatography (SiO<sub>2</sub>, hexane/ethyl acetate = 20:1).

A colorless liquid, 88 mg, 90% yield.

<sup>1</sup>H NMR (CDCl<sub>3</sub>, 500 MHz) δ 7.31–7.23 (m, 6H), 7.23–7.16 (m, 2H), 7.08 (d, *J* = 7.3 Hz, 2H), 6.29 (td, *J* = 7.3, 2.5 Hz, 1H), 4.89 (br d, *J* = 4.3 Hz, 1H), 4.31 (br s, 1H), 2.69–2.57 (m, 2H), 2.53–2.34 (m, 2H), 1.88 (s, 3H).

<sup>13</sup>C NMR (CDCl<sub>3</sub>, 126 MHz) δ 146.6 (d, *J*<sub>CF</sub> = 4 Hz), 141.5, 140.9, 131.3 (dd, *J*<sub>CF</sub> = 6, 6 Hz), 128.5, 128.4, 128.3, 128.2 (dd, *J*<sub>CF</sub> = 31, 21 Hz), 127.47, 127.45, 126.7, 126.1, 119.8 (dd, *J*<sub>CF</sub> = 258, 249 Hz), 101.9, 39.4 (d, *J*<sub>CF</sub> = 3 Hz), 34.6 (d, *J*<sub>CF</sub> = 1 Hz), 30.0, 19.0.

<sup>19</sup>F NMR (CDCl<sub>3</sub>, 471 MHz) δ 103.1 (d, *J* = 159 Hz, 1F), 79.4 (d, *J* = 159 Hz, 1F).

IR (neat):  $\tilde{\nu}$  = 2927, 1703, 1450, 1319, 1154, 1069, 909 cm<sup>-1</sup>.

HRMS (EI): *m/z* calcd. for C<sub>21</sub>H<sub>20</sub>F<sub>2</sub>O [M]<sup>+</sup>: 326.1472; found: 326.1474.

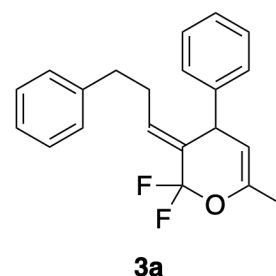

#### 3-2. (*E*)-3-[3-(4-*tert*-Butylphenyl)-2-methylpropan-1-ylidene]-2,2-difluoro-6-methyl-4-phenyl-3,4-dihydro-2*H*-pyran **3b**

Synthesized from 1,1-difluoroallene **1b** (75 mg, 0.30 mmol), *trans*-benzalacetone **2a** (44 mg, 0.30 mmol), AuCl(IPr) (3.8 mg, 0.006 mmol), AgSbF<sub>6</sub> (2.1 mg, 0.006 mmol) and MS 4A (120 mg).

Purified by preparative thin-layer chromatography (SiO<sub>2</sub>, hexane/ethyl acetate = 30:1).

A colorless liquid, 99 mg, 83% yield (dr = 83:17).

<sup>1</sup>H NMR (CDCl<sub>3</sub>, 500 MHz) δ 7.30–7.23 (m, 4H), 7.22–7.15 (m, 3H), 7.03 (d, *J* = 8.2 Hz, 1.66H), 6.75 (d, *J* = 8.2 Hz, 0.34H), 6.16 (br d, *J* = 11.2 Hz, 0.17H), 6.02 (br dd, *J* = 10.5, 2.5 Hz, 0.83H), 4.93 (br d, *J* = 4.3 Hz, 0.17H), 4.61 (br d, *J* = 4.6 Hz, 0.83H), 4.40 (br s, 0.17H), 3.80 (br s, 0.83H), 2.74–2.65 (m, 1H), 2.64 (dd, *J* = 13.2, 5.7 Hz, 0.83H), 2.50 (dd, *J* = 13.2, 8.5 Hz, 0.83H), 2.45 (dd, *J* = 13.3, 6.0 Hz, 0.17H), 2.26 (dd, *J* = 13.3, 8.8 Hz, 0.17H), 1.87 (s, 0.51H), 1.81 (s, 2.49H), 1.30 (s, 7.47H), 1.29 (s, 1.53H), 0.97 (d, *J* = 6.5 Hz, 2.49H), 0.93 (d, *J* = 6.6 Hz, 0.51H).

<sup>13</sup>C NMR (CDCl<sub>3</sub>, 126 MHz) δ 148.8, 148.7, 146.2 (d, *J*<sub>CF</sub> = 4 Hz), 146.1 (d, *J*<sub>CF</sub> = 4 Hz), 142.0, 141.6, 137.9 (dd, *J*<sub>CF</sub> = 6, 6 Hz), 136.6, 136.4 (dd, *J*<sub>CF</sub> = 6, 6 Hz), 136.2, 128.83, 128.82, 128.6,

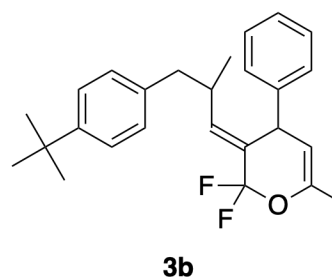



128.4, 127.50, 127.48, 127.24, 127.22, 126.8 (dd,  $J_{CF} = 34, 23$  Hz), 126.7, 126.5, 125.9 (dd,  $J_{CF} = 34, 23$  Hz), 125.04, 125.00, 119.9 (dd,  $J_{CF} = 258, 249$  Hz), 119.8 (dd,  $J_{CF} = 258, 249$  Hz), 102.5, 101.5, 42.7, 41.4 (d,  $J_{CF} = 2$  Hz), 39.6 (d,  $J_{CF} = 3$  Hz), 38.9 (d,  $J_{CF} = 3$  Hz), 35.4, 34.6, 34.35, 34.34, 31.4, 19.7 (d,  $J_{CF} = 2$  Hz), 19.1, 19.0.

$^{19}\text{F}$  NMR ( $\text{CDCl}_3$ , 471 MHz)  $\delta$  103.0 (d,  $J = 159$  Hz, 0.17F), 102.6 (d,  $J = 158$  Hz, 0.83F), 79.6 (d,  $J = 159$  Hz, 0.17F), 79.2 (d,  $J = 158$  Hz, 0.83F).

IR (neat):  $\tilde{\nu} = 2930, 1705, 1462, 1312, 1153, 1069, 902$   $\text{cm}^{-1}$ .

HRMS (EI):  $m/z$  calcd. for  $\text{C}_{26}\text{H}_{30}\text{F}_2\text{O}$   $[\text{M}]^+$ : 396.2260; found: 396.2253.

### 3–3. 2,2-Difluoro-4,6-diphenyl-3-(4-phenylbutan-2-ylidene)-3,4-dihydro-2H-pyran **3c**

Synthesized from 1,1-difluoroallene **1c** (75 mg, 0.39 mmol), *trans*-chalcone **2d** (81 mg, 0.39 mmol), AuCl(IPr) (11.0 mg, 0.018 mmol), AgSbF<sub>6</sub> (6.2 mg, 0.018 mmol) and MS 4A (156 mg).

Purified by column chromatography ( $\text{SiO}_2$ , hexane/ethyl acetate = 20:1).

A colorless liquid, 151 mg, 97% yield ( $E/Z = 53:47$ ).

$^1\text{H}$  NMR ( $\text{CDCl}_3$ , 500 MHz)  $\delta$  7.61–7.54 (m, 2H), 7.33–7.12 (m, 12H), 6.98–6.94 (m, 1H), 5.94 (d,  $J = 6.3$  Hz, 0.53H), 5.82 (d,  $J = 6.5$  Hz, 0.47H), 4.44 (d,  $J = 6.3$  Hz, 0.53H), 4.29 (d,  $J = 6.5$  Hz, 0.47H), 2.83–2.65 (m, 2H), 2.62–2.53 (m, 0.47H), 2.39–2.25 (m, 1.53H), 2.11 (dd,  $J_{\text{HF}} = 3.5, 3.5$  Hz, 1.41H), 1.72 (dd,  $J_{\text{HF}} = 2.8, 2.8$  Hz, 1.59H).

$^{13}\text{C}$  NMR ( $\text{CDCl}_3$ , 126 MHz)  $\delta$  147.1 (d,  $J_{CF} = 2$  Hz), 147.0 (d,  $J_{CF} = 3$  Hz), 144.7, 144.0, 143.7, 142.7, 141.6, 141.2, 132.82, 132.80, 128.9, 128.82, 128.77, 128.77, 128.38, 128.38, 128.38, 128.36, 128.32, 128.294, 128.285, 128.28, 127.3, 126.7, 126.6, 126.03, 125.96, 124.8 (dd,  $J_{CF} = 28, 26$  Hz), 124.56, 124.54 (dd,  $J_{CF} = 28, 26$  Hz), 124.53, 122.5 (dd,  $J_{CF} = 264, 250$  Hz), 122.4 (dd,  $J_{CF} = 261, 253$  Hz), 106.2, 106.0, 42.0, 41.5, 38.2 (dd,  $J_{CF} = 5, 2$  Hz), 38.1, 35.0, 33.1, 20.5, 19.7 (dd,  $J_{CF} = 5, 2$  Hz).

$^{19}\text{F}$  NMR ( $\text{CDCl}_3$ , 471 MHz)  $\delta$  104.9 (d,  $J = 164$  Hz, 1.06F), 104.3 (d,  $J = 164$  Hz, 0.47F), 102.5 (d,  $J = 164$  Hz, 0.47F).

IR (neat):  $\tilde{\nu} = 2938, 1795, 1647, 1600, 1451, 1318, 1140, 650$   $\text{cm}^{-1}$ .

HRMS (EI):  $m/z$  calcd. for  $\text{C}_{27}\text{H}_{24}\text{F}_2\text{O}$   $[\text{M}]^+$ : 402.1790; found: 402.1787, 402.1788.

### 3–4. (*E*)-6-Cyclohexyl-2,2-difluoro-4-phenyl-3-(3-phenylpropan-1-ylidene)-3,4-dihydro-2H-pyran **3d**

Synthesized from 1,1-difluoroallene **1a** (58 mg, 0.32 mmol), enone **2b** (64 mg, 0.30 mmol), AuCl(IPr) (4 mg, 0.006 mmol), AgSbF<sub>6</sub> (2 mg, 0.006 mmol), and MS 4A (121 mg).

Purified by column chromatography ( $\text{SiO}_2$ , hexane/ethyl acetate = 30:1).

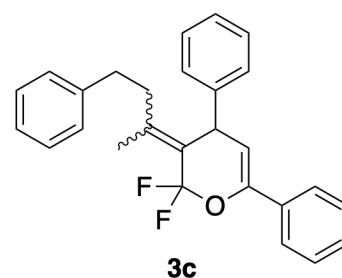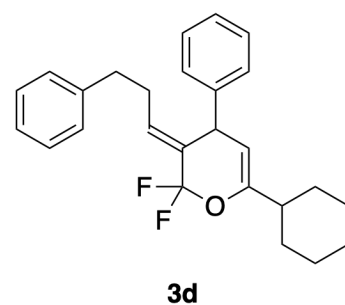

A yellow liquid, 101 mg, 85% yield.

$^1\text{H}$  NMR ( $\text{CDCl}_3$ , 500 MHz)  $\delta$  7.23–7.08 (m, 8H), 7.00 (d,  $J = 7.0$  Hz, 2H), 6.19 (br t,  $J = 7.0$  Hz, 1H), 4.77 (br d,  $J = 3.8$  Hz, 1H), 4.24 (br s, 1H), 2.60–2.47 (m, 2H), 2.42–2.25 (m, 2H), 1.99–1.93 (m, 1H), 1.85–1.78 (m, 2H), 1.72–1.66 (m, 2H), 1.62–1.58 (m, 1H), 1.22–1.08 (m, 5H).

$^{13}\text{C}$  NMR ( $\text{CDCl}_3$ , 126 MHz)  $\delta$  154.3 (d,  $J_{\text{CF}} = 4$  Hz), 141.9, 141.0, 131.0 (dd,  $J_{\text{CF}} = 6, 6$  Hz), 128.9 (dd,  $J_{\text{CF}} = 32, 22$  Hz), 128.5, 128.4, 128.3, 127.59, 127.57, 127.5, 127.3, 127.1, 126.6, 126.1, 120.0 (dd,  $J_{\text{CF}} = 257, 248$  Hz), 99.9, 41.2, 39.5 (d,  $J_{\text{CF}} = 3$  Hz), 34.6, 30.3, 30.1, 30.0, 26.03, 25.97.

$^{19}\text{F}$  NMR ( $\text{CDCl}_3$ , 471 MHz)  $\delta$  104.8 (d,  $J = 158$  Hz, 1F), 81.8 (d,  $J = 158$  Hz, 1F).

IR (neat):  $\tilde{\nu} = 2930, 1725, 1453, 1154, 1059$   $\text{cm}^{-1}$ .

HRMS (EI):  $m/z$  calcd. for  $\text{C}_{26}\text{H}_{28}\text{F}_2\text{O}$   $[\text{M}]^+$ : 394.2103; found: 394.2093.

3–5. (*E,E*)-2,2-Difluoro-4-phenyl-3-(3-phenylpropan-1-ylidene)-6-(2-phenylvinyl)-3,4-dihydro-2H-pyran **3e**

Synthesized from 1,1-difluoroallene **1a** (58 mg, 0.32 mmol), enone **2c** (70 mg, 0.32 mmol), AuCl(IPr) (4 mg, 0.006 mmol), AgSbF<sub>6</sub> (2 mg, 0.006 mmol), and MS 4A (128 mg).

Purified by column chromatography ( $\text{SiO}_2$ , hexane/ethyl acetate = 30:1).

A pale yellow liquid, 131 mg, quantitative yield.

$^1\text{H}$  NMR ( $\text{CDCl}_3$ , 500 MHz)  $\delta$  7.31 (dd,  $J = 7.1, 1.4$  Hz, 2H), 7.22–7.06 (m, 11H), 6.97 (dd,  $J = 7.1, 1.4$  Hz, 2H), 6.91 (d,  $J = 15.9$  Hz, 1H), 6.35 (d,  $J = 15.9$  Hz, 1H), 6.25 (t,  $J = 6.5$  Hz, 1H), 5.13 (br d,  $J = 4.6$  Hz, 1H), 4.37 (br s, 1H), 2.56–2.46 (m, 2H), 2.40–2.25 (m, 2H).

$^{13}\text{C}$  NMR ( $\text{CDCl}_3$ , 126 MHz)  $\delta$  146.6 (d,  $J_{\text{CF}} = 4$  Hz), 141.2, 140.8, 136.3, 131.8 (dd,  $J_{\text{CF}} = 6, 6$  Hz), 129.6, 128.70, 128.65, 128.5, 128.3, 128.1, 127.7, 127.6, 126.9, 126.8, 126.2, 120.8, 120.1 (dd,  $J_{\text{CF}} = 259, 250$  Hz), 107.5, 40.3 (d,  $J_{\text{CF}} = 3$  Hz), 34.5 (d,  $J_{\text{CF}} = 1$  Hz), 30.0.

$^{19}\text{F}$  NMR ( $\text{CDCl}_3$ , 470 MHz)  $\delta$  104.8 (d,  $J = 158$  Hz, 1F), 82.3 (d,  $J = 158$  Hz, 1F).

IR (neat):  $\tilde{\nu} = 2928, 1495, 1452, 1329, 1264, 1153, 484$   $\text{cm}^{-1}$ .

HRMS (EI):  $m/z$  calcd. for  $\text{C}_{28}\text{H}_{24}\text{F}_2\text{O}$   $[\text{M}]^+$ : 414.1790; found: 414.1797.

3–6. (*E*)-2,2-Difluoro-4,6-diphenyl-3-(3-phenylpropan-1-ylidene)-3,4-dihydro-2H-pyran **3f**

Synthesized from 1,1-difluoroallene **1a** (186 mg, 1.03 mmol), enone **2d** (218 mg, 1.05 mmol), AuCl(IPr) (12 mg, 0.020 mmol), AgSbF<sub>6</sub> (7 mg, 0.019 mmol), and MS 4A (401 mg).

Purified by column chromatography ( $\text{SiO}_2$ , hexane/ethyl acetate = 30:1).

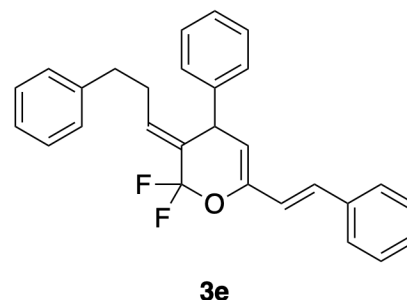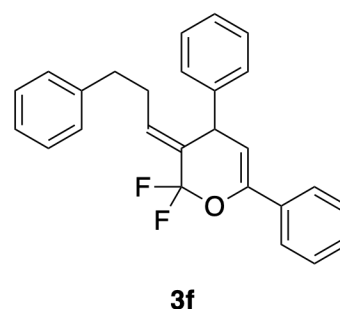

A colorless liquid, 399 mg, quantitative yield.

$^1\text{H}$  NMR ( $\text{CDCl}_3$ , 500 MHz)  $\delta$  7.49 (d,  $J = 7.4$  Hz, 2H), 7.25–7.05 (m, 11H), 6.96 (d,  $J = 7.4$  Hz, 2H), 7.25 (br t,  $J = 3.2$  Hz, 1H), 5.52 (br d,  $J = 3.4$  Hz, 1H), 4.38 (br s, 1H), 2.55–2.45 (m, 2H), 2.42–2.26 (m, 2H).

$^{13}\text{C}$  NMR ( $\text{CDCl}_3$ , 126 MHz)  $\delta$  147.1 (d,  $J_{\text{CF}} = 4$  Hz), 141.3, 140.8, 132.9, 131.6 (dd,  $J_{\text{CF}} = 6, 6$  Hz), 128.9, 128.6, 128.4, 128.31, 128.27, 127.65, 127.64, 126.8, 126.1, 124.7, 120.3 (dd,  $J_{\text{CF}} = 259, 250$  Hz), 102.9, 40.1, 34.4, 30.0.

$^{19}\text{F}$  NMR ( $\text{CDCl}_3$ , 471 MHz)  $\delta$  104.3 (d,  $J = 157$  Hz, 1F), 81.9 (d,  $J = 157$  Hz, 1F).

IR (neat):  $\tilde{\nu} = 3028, 3015, 1677, 1496, 1323, 1163, 1059$   $\text{cm}^{-1}$ .

HRMS (EI):  $m/z$  calcd. for  $\text{C}_{26}\text{H}_{22}\text{F}_2\text{O}$   $[\text{M}]^+$ : 388.1634; found: 388.1653.

3–7. (*E*)-2,2-Difluoro-6-(4-methylphenyl)-4-phenyl-3-(3-phenylpropan-1-ylidene)-3,4-dihydro-2*H*-pyran **3g**

Synthesized from 1,1-difluoroallene **1a** (56 mg, 0.031 mmol), enone **2e** (69 mg, 0.31 mmol), AuCl(IPr) (4 mg, 0.006 mmol), AgSbF<sub>6</sub> (3 mg, 0.008 mmol), and MS 4A (122 mg).

Purified by column chromatography ( $\text{SiO}_2$ , hexane/ethyl acetate = 30:1).

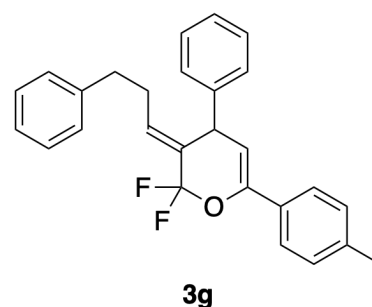

A yellow liquid, 126 mg, quantitative yield.

$^1\text{H}$  NMR ( $\text{CDCl}_3$ , 500 MHz)  $\delta$  7.40 (d,  $J = 8.0$  Hz, 2H), 7.23–7.08 (m, 8H), 7.06 (d,  $J = 8.0$  Hz, 2H), 6.99 (d,  $J = 7.1$  Hz, 2H), 6.26 (br t,  $J = 6.0$  Hz, 1H), 5.50 (br d,  $J = 3.6$  Hz, 1H), 4.40 (br s, 1H), 2.59–2.47 (m, 2H), 2.47–2.27 (m, 2H), 2.25 (s, 3H).

$^{13}\text{C}$  NMR ( $\text{CDCl}_3$ , 126 MHz)  $\delta$  147.3 (d,  $J_{\text{CF}} = 9$  Hz), 141.5, 140.9, 138.9, 131.5 (dd,  $J_{\text{CF}} = 6, 6$  Hz), 131.4, 129.0, 128.6, 128.4, 128.3, 127.71, 127.69, 126.8, 126.1, 124.7, 120.2 (dd,  $J_{\text{CF}} = 259, 250$  Hz), 102.0, 40.1 (d,  $J_{\text{CF}} = 3$  Hz), 34.6, 30.1, 21.2.

$^{19}\text{F}$  NMR ( $\text{CDCl}_3$ , 471 MHz)  $\delta$  104.1 (d,  $J = 158$  Hz, 1F), 81.8 (d,  $J = 158$  Hz, 1F).

IR (neat):  $\tilde{\nu} = 3030, 1495, 1453, 1319, 1163, 1058, 758$   $\text{cm}^{-1}$ .

HRMS (EI):  $m/z$  calcd. for  $\text{C}_{27}\text{H}_{24}\text{F}_2\text{O}$   $[\text{M}]^+$ : 402.1790; found: 402.1783.

3–8. (*E*)-6-(4-Chlorophenyl)-2,2-difluoro-4-phenyl-3-(3-phenylpropan-1-ylidene)-3,4-dihydro-2*H*-pyran **3h**

Synthesized from 1,1-difluoroallene **1a** (59 mg, 0.33 mmol), enone **2f** (74 mg, 0.30 mmol), AuCl(IPr) (5 mg, 0.008 mmol), AgSbF<sub>6</sub> (2 mg, 0.006 mmol), and MS 4A (122 mg).

Purified by column chromatography ( $\text{SiO}_2$ , hexane/ethyl acetate = 30:1).

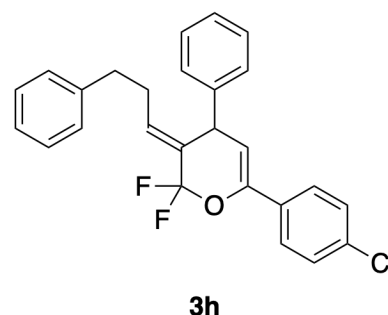

A pale yellow liquid, 125 mg, 97% yield.

$^1\text{H}$  NMR ( $\text{CDCl}_3$ , 500 MHz)  $\delta$  7.42 (d,  $J = 8.5$  Hz, 2H), 7.24–7.11 (m, 9H), 7.08 (t,  $J = 7.0$  Hz, 1H), 6.98 (d,  $J = 7.5$  Hz, 2H), 6.27 (br t,  $J = 6.5$  Hz, 1H), 5.53 (br d,  $J = 2.8$  Hz, 1H), 4.40 (br s, 1H), 2.58–2.47 (m, 2H), 2.44–2.28 (m, 2H).

$^{13}\text{C}$  NMR ( $\text{CDCl}_3$ , 126 MHz)  $\delta$  146.3 (d,  $J_{\text{CF}} = 5$  Hz), 141.1, 140.8, 134.8, 131.9 (dd,  $J_{\text{CF}} = 6, 6$  Hz), 131.5, 128.7, 128.6, 128.4, 128.3, 128.2 (dd,  $J_{\text{CF}} = 31, 22$  Hz), 127.6 (d,  $J_{\text{CF}} = 3$  Hz), 127.0, 126.14, 126.07, 120.1 (dd  $J_{\text{CF}} = 259, 250$  Hz), 103.4, 40.2, 34.5, 30.1.

$^{19}\text{F}$  NMR ( $\text{CDCl}_3$ , 471 MHz)  $\delta$  103.9 (d,  $J = 158$  Hz, 1F), 81.7 (d,  $J = 158$  Hz, 1F).

IR (neat):  $\tilde{\nu} = 2930, 1675, 1493, 1315, 1161, 834$   $\text{cm}^{-1}$ .

HRMS (EI):  $m/z$  calcd. for  $\text{C}_{26}\text{H}_{21}\text{ClF}_2\text{O}$   $[\text{M}]^+$ : 422.1244; found: 422.1229.

### 3–9. (*E*)-2,2-Difluoro-6-(4-nitrophenyl)-4-phenyl-3-(3-phenylpropan-1-ylidene)-3,4-dihydro-2*H*-pyran **3i**

Synthesized from 1,1-difluoroallene **1a** (60 mg, 0.33 mmol), enone **2g** (79 mg, 0.31 mmol),  $\text{AuCl}(\text{IPr})$  (4 mg, 0.006 mmol),  $\text{AgSbF}_6$  (2 mg, 0.006 mmol), and MS 4A (120 mg).

Purified by column chromatography ( $\text{SiO}_2$ , hexane/ethyl acetate = 30:1).

A yellow liquid, 106 mg, 78% yield.

$^1\text{H}$  NMR ( $\text{CDCl}_3$ , 500 MHz)  $\delta$  8.13 (d,  $J = 9.0$  Hz, 2H), 7.67 (d,  $J = 9.0$  Hz, 2H), 7.27–7.15 (m, 7H), 7.11 (t,  $J = 7.0$  Hz, 1H), 7.00 (d,  $J = 5.8$  Hz, 2H), 6.33 (br t,  $J = 6.8$  Hz, 1H), 5.78 (br d,  $J = 4.5$  Hz, 1H), 4.46 (br s, 1H), 2.62–2.50 (m, 2H), 2.46–2.30 (m, 2H).

$^{13}\text{C}$  NMR ( $\text{CDCl}_3$ , 126 MHz)  $\delta$  147.8, 145.4 (d,  $J_{\text{CF}} = 5$  Hz), 140.7, 140.5, 138.9, 132.5 (dd,  $J_{\text{CF}} = 6, 6$  Hz), 128.9, 128.5, 128.3, 127.64, 127.63 (dd,  $J_{\text{CF}} = 30, 26$  Hz), 127.2, 126.2, 125.4, 123.7, 120.0 (dd  $J_{\text{CF}} = 260, 251$  Hz), 107.1, 40.4 (d,  $J_{\text{CF}} = 3$  Hz), 34.5, 30.1.

$^{19}\text{F}$  NMR ( $\text{CDCl}_3$ , 471 MHz)  $\delta$  103.7 (d,  $J = 158$  Hz, 1F), 81.5 (d,  $J = 158$  Hz, 1F).

IR (neat):  $\tilde{\nu} = 3027, 1599, 1522, 1348, 1217, 1162, 771$   $\text{cm}^{-1}$ .

HRMS (EI):  $m/z$  calcd. for  $\text{C}_{26}\text{H}_{21}\text{F}_2\text{NO}_3$   $[\text{M}]^+$ : 433.1485; found: 433.1504.

### 3–10. (*E*)-2,2-Difluoro-4-(4-methylphenyl)-6-phenyl-3-(3-phenylpropan-1-ylidene)-3,4-dihydro-2*H*-pyran **3j**

Synthesized from 1,1-difluoroallene **1a** (54 mg, 0.30 mmol), enone **2h** (68 mg, 0.31 mmol),  $\text{AuCl}(\text{IPr})$  (4 mg, 0.006 mmol),  $\text{AgSbF}_6$  (3 mg, 0.009 mmol), and MS 4A (121 mg).

Purified by column chromatography ( $\text{SiO}_2$ , hexane/ethyl acetate = 30:1).

A colorless liquid, 116 mg, 96% yield.

$^1\text{H}$  NMR ( $\text{CDCl}_3$ , 500 MHz)  $\delta$  7.50 (dd,  $J = 8.3, 1.5$  Hz, 2H), 7.25–7.05 (m, 8H), 7.00–6.98 (m,

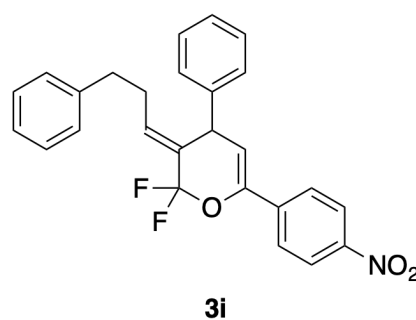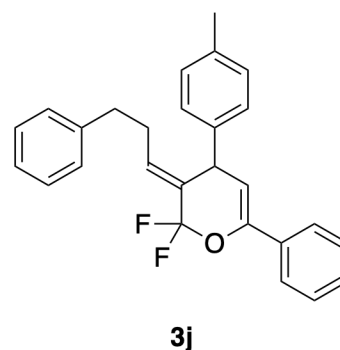

4H), 6.24 (br t,  $J = 6.6$  Hz, 1H), 5.53 (br d,  $J = 4.5$  Hz, 1H), 4.36 (br s, 1H), 2.54–2.50 (m, 2H), 2.42–2.28 (m, 2H), 2.20 (s, 3H).

$^{13}\text{C}$  NMR ( $\text{CDCl}_3$ , 126 MHz)  $\delta$  147.1 (d,  $J_{\text{CF}} = 5$  Hz), 140.9, 138.3, 136.5, 133.0, 131.4 (dd,  $J_{\text{CF}} = 6$ , 6 Hz), 129.3, 128.8, 128.6 (dd,  $J_{\text{CF}} = 32$ , 21 Hz), 128.4, 128.3, 127.58, 127.56, 126.1, 124.7, 120.2 (dd,  $J_{\text{CF}} = 259$ , 250 Hz), 103.0, 39.8 (d,  $J_{\text{CF}} = 3$  Hz), 34.6, 30.0, 21.0.

$^{19}\text{F}$  NMR ( $\text{CDCl}_3$ , 471 MHz)  $\delta$  104.1 (d,  $J = 157$  Hz, 1F), 81.9 (d,  $J = 157$  Hz, 1F).

IR (neat):  $\tilde{\nu} = 3013$ , 2976, 1326, 1163, 1059  $\text{cm}^{-1}$ .

HRMS (EI):  $m/z$  calcd. for  $\text{C}_{27}\text{H}_{24}\text{F}_2\text{O}$   $[\text{M}]^+$ : 402.1790; found: 402.1777.

3–11. (*E*)-4-(4-Chlorophenyl)-2,2-difluoro-6-phenyl-3-(3-phenylpropan-1-ylidene)-3,4-dihydro-2*H*-pyran **3k**

Synthesized from 1,1-difluoroallene **1a** (58 mg, 0.32 mmol), enone **2i** (72 mg, 0.30 mmol), AuCl(IPr) (5 mg, 0.007 mmol), AgSbF<sub>6</sub> (2 mg, 0.007 mmol), and MS 4A (128 mg).

Purified by column chromatography ( $\text{SiO}_2$ , hexane/ethyl acetate = 30:1).

A yellow liquid, 131 mg, quantitative yield.

$^1\text{H}$  NMR ( $\text{CDCl}_3$ , 400 MHz)  $\delta$  7.53–7.43 (m, 2H), 7.28–6.93 (m, 12H), 6.25 (br t,  $J = 6.4$  Hz, 1H), 5.47 (br d,  $J = 4.6$  Hz, 1H), 4.34 (br s, 1H), 2.56–2.52 (m, 2H), 2.44–2.27 (m, 2H).

$^{13}\text{C}$  NMR ( $\text{CDCl}_3$ , 126 MHz)  $\delta$  147.6 (d,  $J_{\text{CF}} = 5$  Hz), 140.6, 139.7, 132.8, 132.7, 131.8 (dd,  $J_{\text{CF}} = 6$ , 6 Hz), 129.1, 129.0 (d,  $J_{\text{CF}} = 3$  Hz), 128.7, 128.5, 128.4, 128.3, 128.1 (dd,  $J_{\text{CF}} = 31$ , 22 Hz), 126.2, 124.8, 120.1 (dd,  $J_{\text{CF}} = 259$ , 250 Hz), 102.1, 39.4 (d,  $J_{\text{CF}} = 3$  Hz), 34.6, 30.0.

$^{19}\text{F}$  NMR ( $\text{CDCl}_3$ , 470 MHz)  $\delta$  104.3 (d,  $J = 158$  Hz, 1F), 81.5 (d,  $J = 158$  Hz, 1F).

IR (neat):  $\tilde{\nu} = 3028$ , 1677, 1491, 1324, 1162, 1035, 752  $\text{cm}^{-1}$ .

HRMS (EI):  $m/z$  calcd. for  $\text{C}_{26}\text{H}_{21}\text{ClF}_2\text{O}$   $[\text{M}]^+$ : 422.1244; found: 422.1250.

3–12. (*E*)-2,2-Difluoro-4-(4-nitrophenyl)-6-phenyl-3-(3-phenylpropan-1-ylidene)-3,4-dihydro-2*H*-pyran **3l**

Synthesized from 1,1-difluoroallene **1a** (60 mg, 0.33 mmol), enone **2j** (78 mg, 0.31 mmol), AuCl(IPr) (5 mg, 0.008 mmol), AgSbF<sub>6</sub> (2 mg, 0.007 mmol), and MS 4A (123 mg).

Purified by column chromatography ( $\text{SiO}_2$ , hexane/ethyl acetate = 30:1).

A yellow liquid, 89 mg, 67% yield.

$^1\text{H}$  NMR ( $\text{CDCl}_3$ , 500 MHz)  $\delta$  8.04 (d,  $J = 8.8$  Hz, 2H), 7.54–7.52 (m, 2H), 7.35–7.28 (m, 5H), 7.20–7.11 (m, 3H), 7.02 (d,  $J = 7.2$  Hz, 2H), 6.35 (br t,  $J = 6.2$  Hz, 1H), 5.52 (br d,  $J = 4.6$  Hz, 1H), 4.47 (br s, 1H), 2.66–2.63 (m, 2H), 2.51–2.32 (m, 2H).

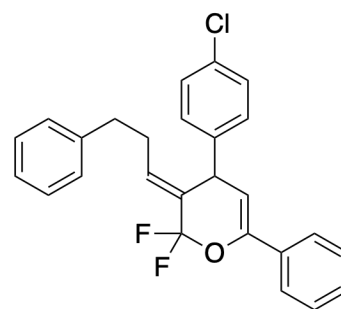

**3k**

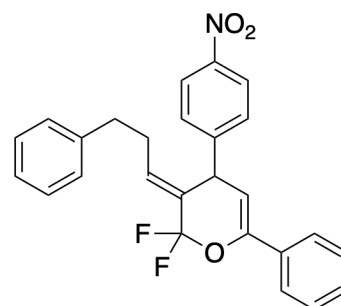

**3l**

$^{13}\text{C}$  NMR ( $\text{CDCl}_3$ , 126 MHz)  $\delta$  148.5 (d,  $J_{\text{CF}} = 6$  Hz, 1H), 148.4, 146.8, 140.4, 132.6 (d,  $J_{\text{CF}} = 6$  Hz), 132.5 (d,  $J_{\text{CF}} = 5$  Hz), 129.4, 128.6, 128.5, 128.4, 128.3, 127.3 (dd,  $J_{\text{CF}} = 32, 22$  Hz), 126.3, 124.9, 123.9, 119.9 (dd,  $J_{\text{CF}} = 258, 251$  Hz), 100.6, 39.5 (d,  $J_{\text{CF}} = 3$  Hz), 34.6, 30.2.

$^{19}\text{F}$  NMR ( $\text{CDCl}_3$ , 471 MHz)  $\delta$  104.5 (d,  $J = 158$  Hz, 1F), 80.9 (d,  $J = 158$  Hz, 1F).

IR (neat):  $\tilde{\nu} = 2928, 1523, 1349, 1265, 1164, 909$   $\text{cm}^{-1}$ .

HRMS (EI):  $m/z$  calcd. for  $\text{C}_{26}\text{H}_{21}\text{F}_2\text{NO}_3$   $[\text{M}]^+$ : 433.1485; found: 433.1487.

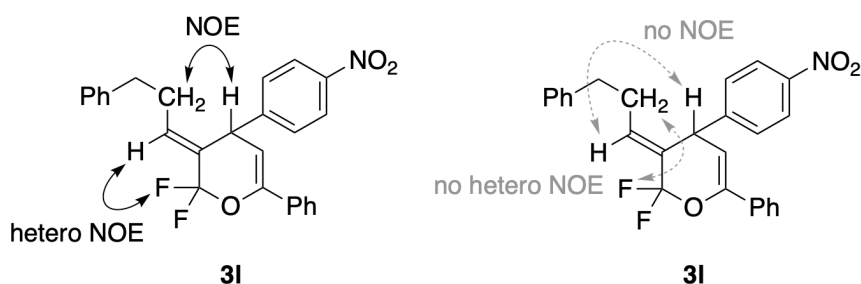

Figure S1.

3–13. (*E*)-2,2-Difluoro-6-phenyl-3-(3-phenylpropan-1-ylidene)-4-(2-thienyl)-3,4-dihydro-2*H*-pyran **3m**

Synthesized from 1,1-difluoroallene **1a** (47 mg, 0.26 mmol), enone **2k** (57 mg, 0.26 mmol), AuCl(IPr) (4 mg, 0.006 mmol), AgSbF<sub>6</sub> (2 mg, 0.006 mmol), and MS 4A (122 mg).

Purified by column chromatography ( $\text{SiO}_2$ , hexane/ethyl acetate = 30:1).

A yellow liquid, 94 mg, 91% yield.

$^1\text{H}$  NMR ( $\text{CDCl}_3$ , 500 MHz)  $\delta$  7.52 (d,  $J = 8.0$  Hz, 2H), 7.30–

7.23 (m, 3H), 7.19 (dd,  $J = 7.5, 7.5$  Hz, 2H), 7.13–7.05 (m, 4H), 6.83–6.78 (m, 2H), 6.26 (td,  $J = 7.5, 2.5$  Hz, 1H), 5.59 (dd,  $J = 9.5, 1.5$  Hz, 1H), 4.62 (br s, 1H), 2.70–2.58 (m, 2H), 2.52–2.45 (m, 2H).

$^{13}\text{C}$  NMR ( $\text{CDCl}_3$ , 126 MHz)  $\delta$  147.7 (d,  $J_{\text{CF}} = 5$  Hz), 144.4, 140.7, 132.8, 131.4 (dd,  $J_{\text{CF}} = 6, 6$  Hz), 129.1, 128.5, 128.2, 128.0 (dd,  $J_{\text{CF}} = 32, 22$  Hz), 126.7, 126.2, 124.9, 124.7 (d,  $J_{\text{CF}} = 2$  Hz), 124.2, 119.9 (dd,  $J_{\text{CF}} = 260, 250$  Hz), 101.6, 35.0 (d,  $J_{\text{CF}} = 3$  Hz), 34.6, 30.0.

$^{19}\text{F}$  NMR ( $\text{CDCl}_3$ , 471 MHz)  $\delta$  104.1 (d,  $J = 156$  Hz, 1F), 79.8 (d,  $J = 156$  Hz, 1F).

IR (neat):  $\tilde{\nu} = 2929, 1496, 1323, 1165, 1063, 699$   $\text{cm}^{-1}$ .

HRMS (EI):  $m/z$  calcd. for  $\text{C}_{24}\text{H}_{20}\text{F}_2\text{OS}$   $[\text{M}]^+$ : 394.1197; found: 394.1204.

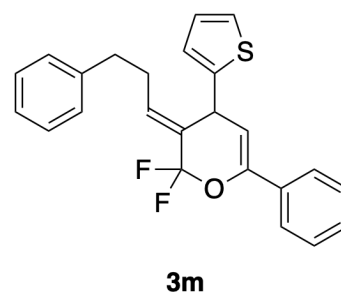

## 4. NMR Spectra of Products

$^1\text{H}$  NMR Spectrum of (*E*)-2,2-Difluoro-6-methyl-4-phenyl-3-(3-phenylpropan-1-ylidene)-3,4-dihydro-2*H*-pyran **3a**

```

NAME dm-20241108-1467-Data-1H
EXPNO 1
PROCNO 1
Date_ 20241108
Time 16:30
INSTRUM spect
PROBHD 5 mm PHQP 541
PULPROG zgpg30
SOLVENT CDCl3
NS 8
DS 8
AQ 7507.607 Hz
FIDRES 0.114555 Hz
AQ 4.3648145 sec
DM 66.600 usec
DE 236.3 K
DI 1.00000000 sec
TD0
===== CHANNEL f1 =====
NUC1 1H
P1 9.80 usec
PL 0.00 dB
SFO1 500.132500 MHz
SI 32768
SF 500.1300320 MHz
WDW 0
SSB 0
LB 0
GB 0
PC 10.00
  
```

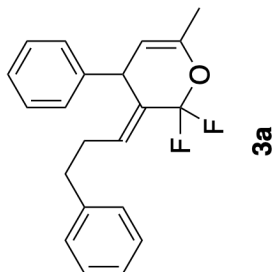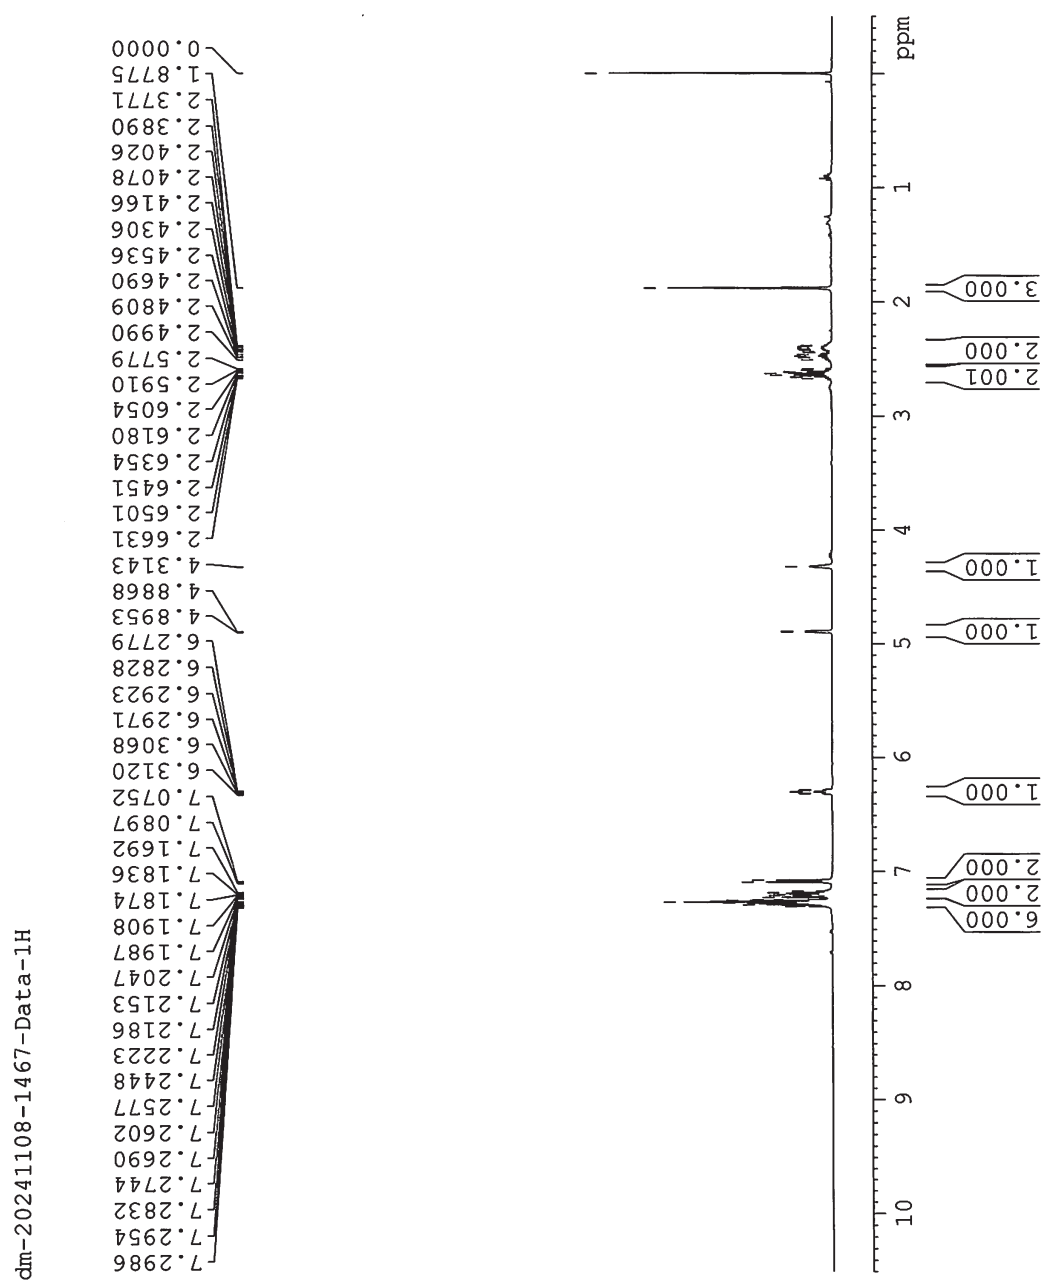



$^{13}\text{C}$  NMR Spectrum of (*E*)-2,2-Difluoro-6-methyl-4-phenyl-3-(3-phenylpropan-1-ylidene)-3,4-dihydro-2*H*-pyran **3a**

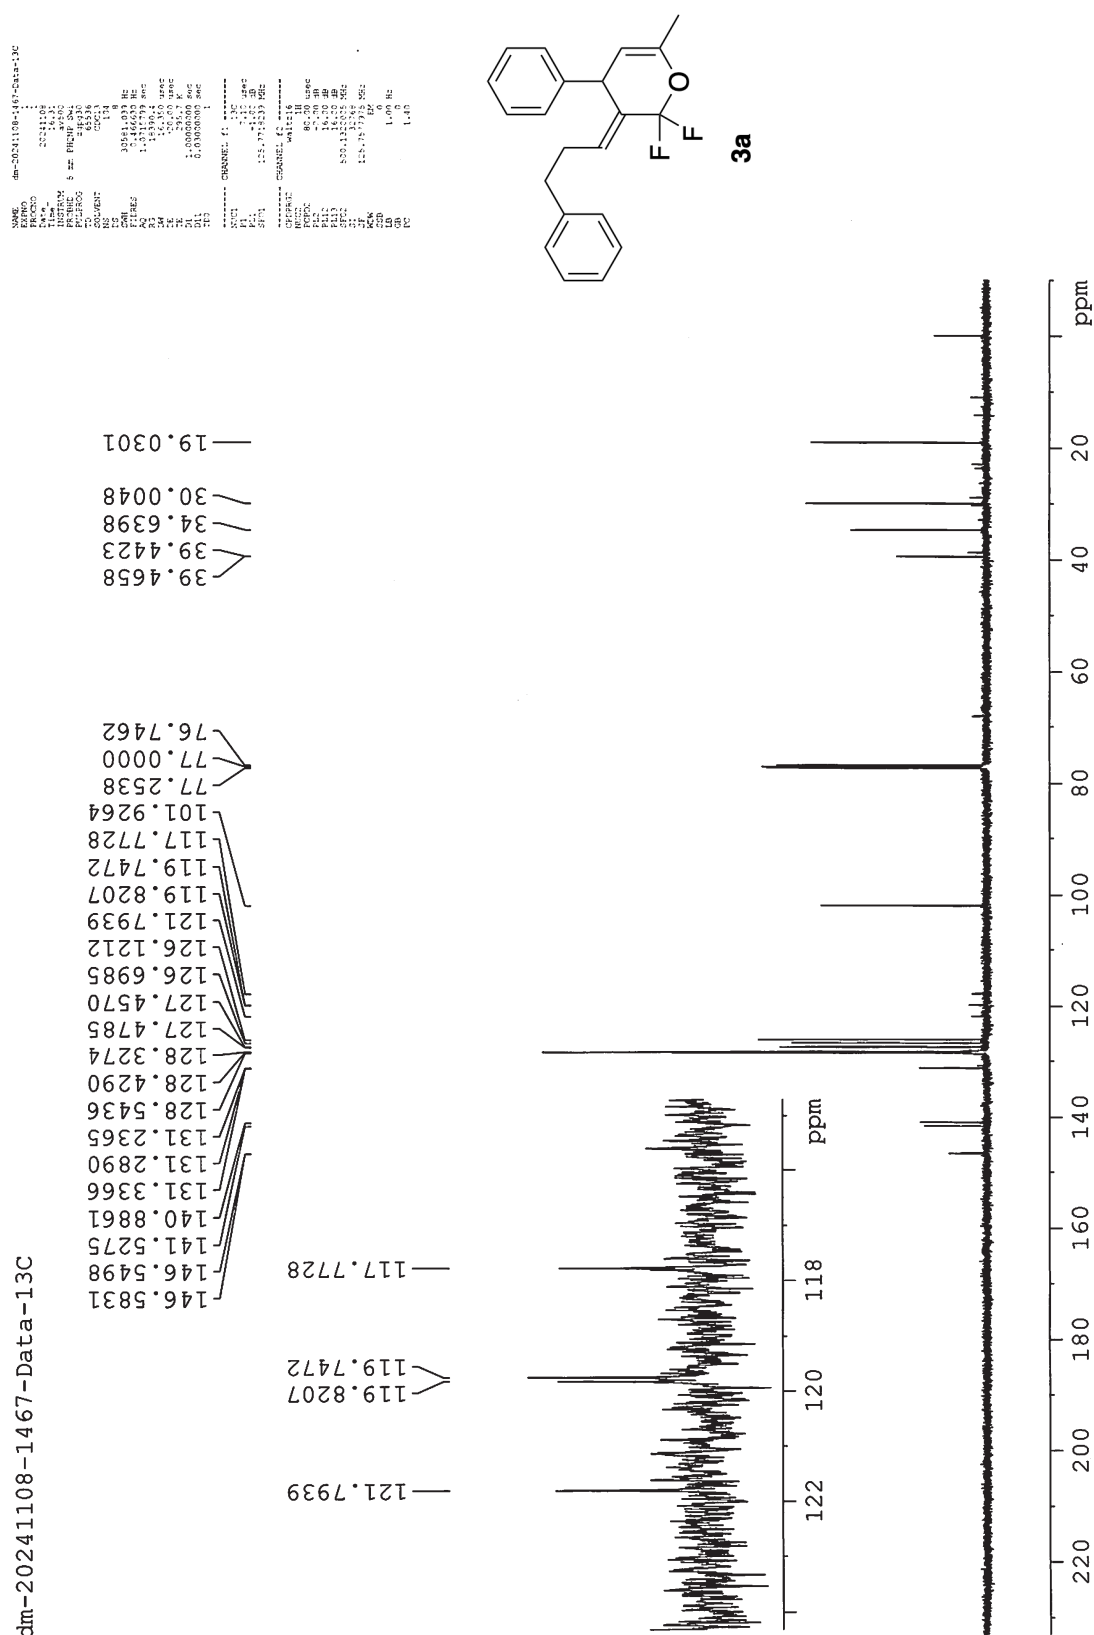



$^{19}\text{F}$  NMR Spectrum of (*E*)-2,2-Difluoro-6-methyl-4-phenyl-3-(3-phenylpropan-1-ylidene)-3,4-dihydro-2*H*-pyran **3a**

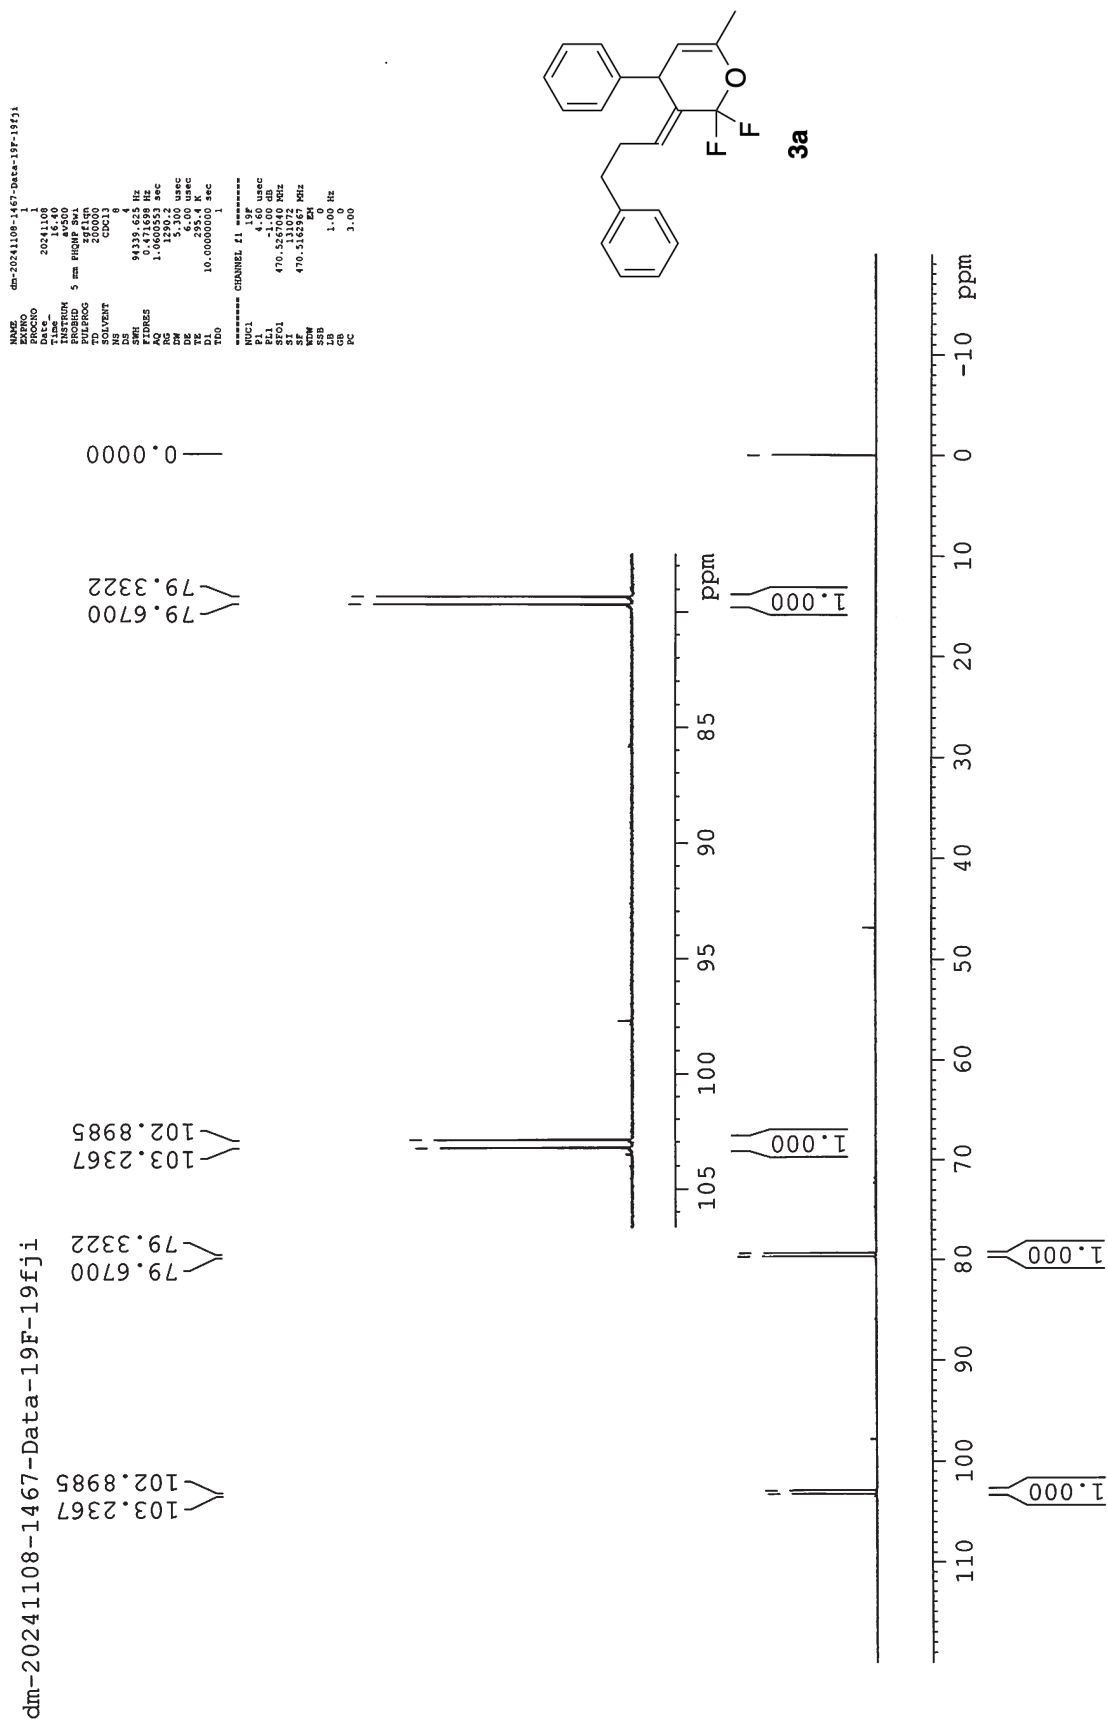

<sup>1</sup>H NMR Spectrum of (*E*)-3-[3-(4-*tert*-Butylphenyl)-2-methylpropan-1-ylidene]-2,2-difluoro-6-methyl-7-phenyl-3,4-dihydro-2*H*-pyran **3b** (dr = 83:17)

```

NAME dm-20241106-1494-Data-1H
EXPNO 1
PROCNO 1
PROCNO 1
TIME 20241106
TIME 10.20
INSTRUM av500
PROBHD 5 mm BBOCP
PULPROG zgpg30
TD 65536
SOLVENT CDCl3
DS 2
SS 7507.507 Hz
AQ 4.144833 Hz
RG 512
RG 57
DM 66.600 usec
DE 1.0000000 usec
TE 295.1 K
TD0 1.0000000 sec
===== CHANNEL f1 =====
NUC1 1H
P1 9.00 usec
PL1 -2.00 dB
SFO1 500.132508 MHz
SF 500.132508 MHz
WDW EM
SSB 0
GB 0
PC 10.00
  
```

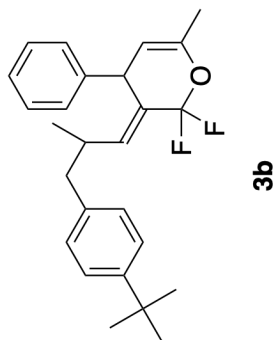

dm-20241106-1494-Data-1H

7.2798  
7.2634  
7.2519  
7.2367  
7.2287  
7.2091  
7.1927  
7.1795  
7.1679  
7.1633  
7.1451  
7.0288  
6.7644  
6.7481  
6.1705  
6.1527  
6.0356  
6.0307  
6.0147  
6.0095  
4.9390  
4.9304  
4.6115  
4.6024  
4.4030  
4.4001  
2.7068  
2.6578  
2.6464  
2.6315  
2.6202  
2.5245  
2.5075  
2.4982  
2.4813  
2.2865  
2.2689  
2.2599  
2.2420  
1.8734  
1.8103  
1.3018  
1.2877  
0.9779

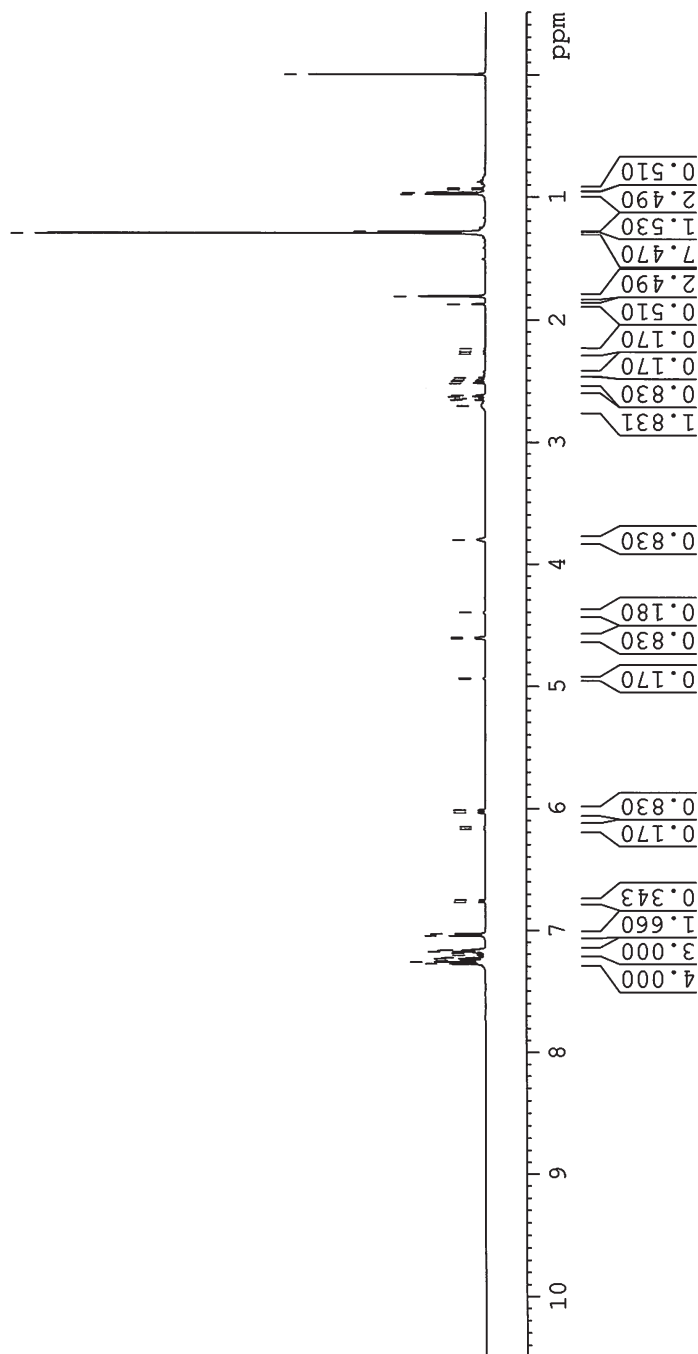

$^{13}\text{C}$  NMR Spectrum of (*E*)-3-[3-(4-*tert*-Butylphenyl)-2-methylpropan-1-ylidene]-2,2-difluoro-6-methyl-7-phenyl-3,4-dihydro-2*H*-pyran **3b** (dr = 83:17)

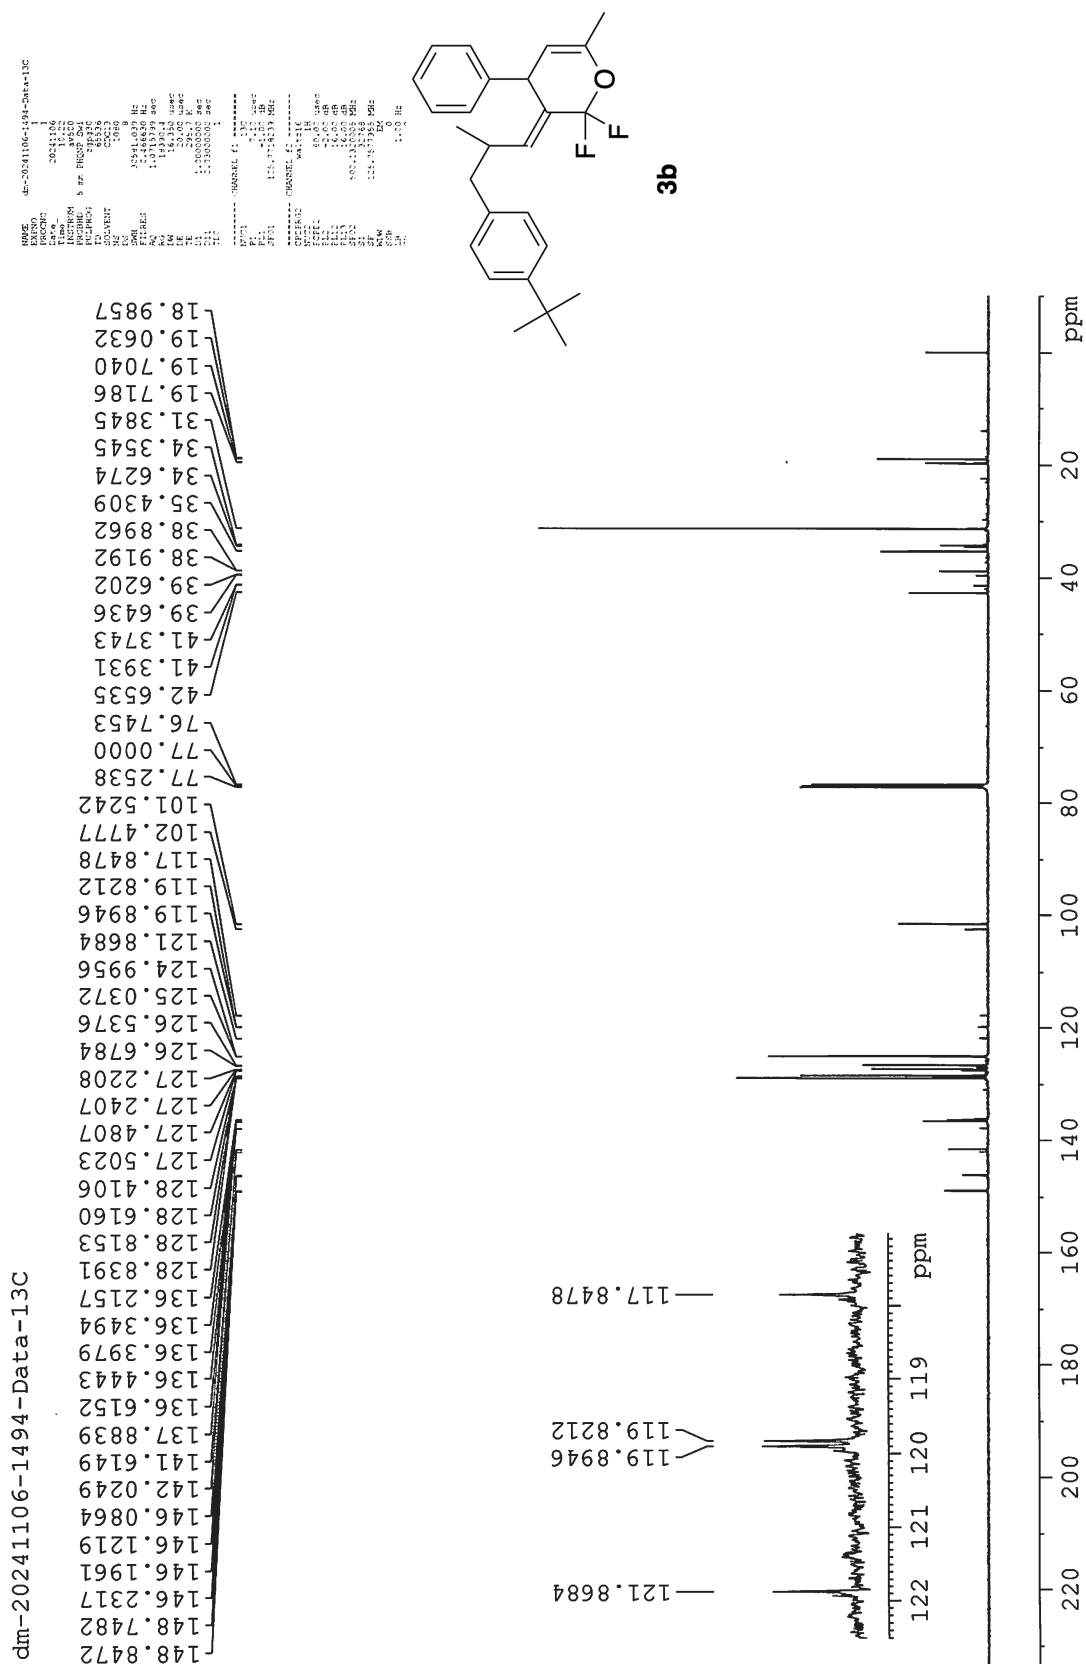

$^{19}\text{F}$  NMR Spectrum of (*E*)-3-[3-(4-*tert*-Butylphenyl)-2-methylpropan-1-ylidene]-2,2-difluoro-6-methyl-7-phenyl-3,4-dihydro-2*H*-pyran **3b** (dr = 83:17)

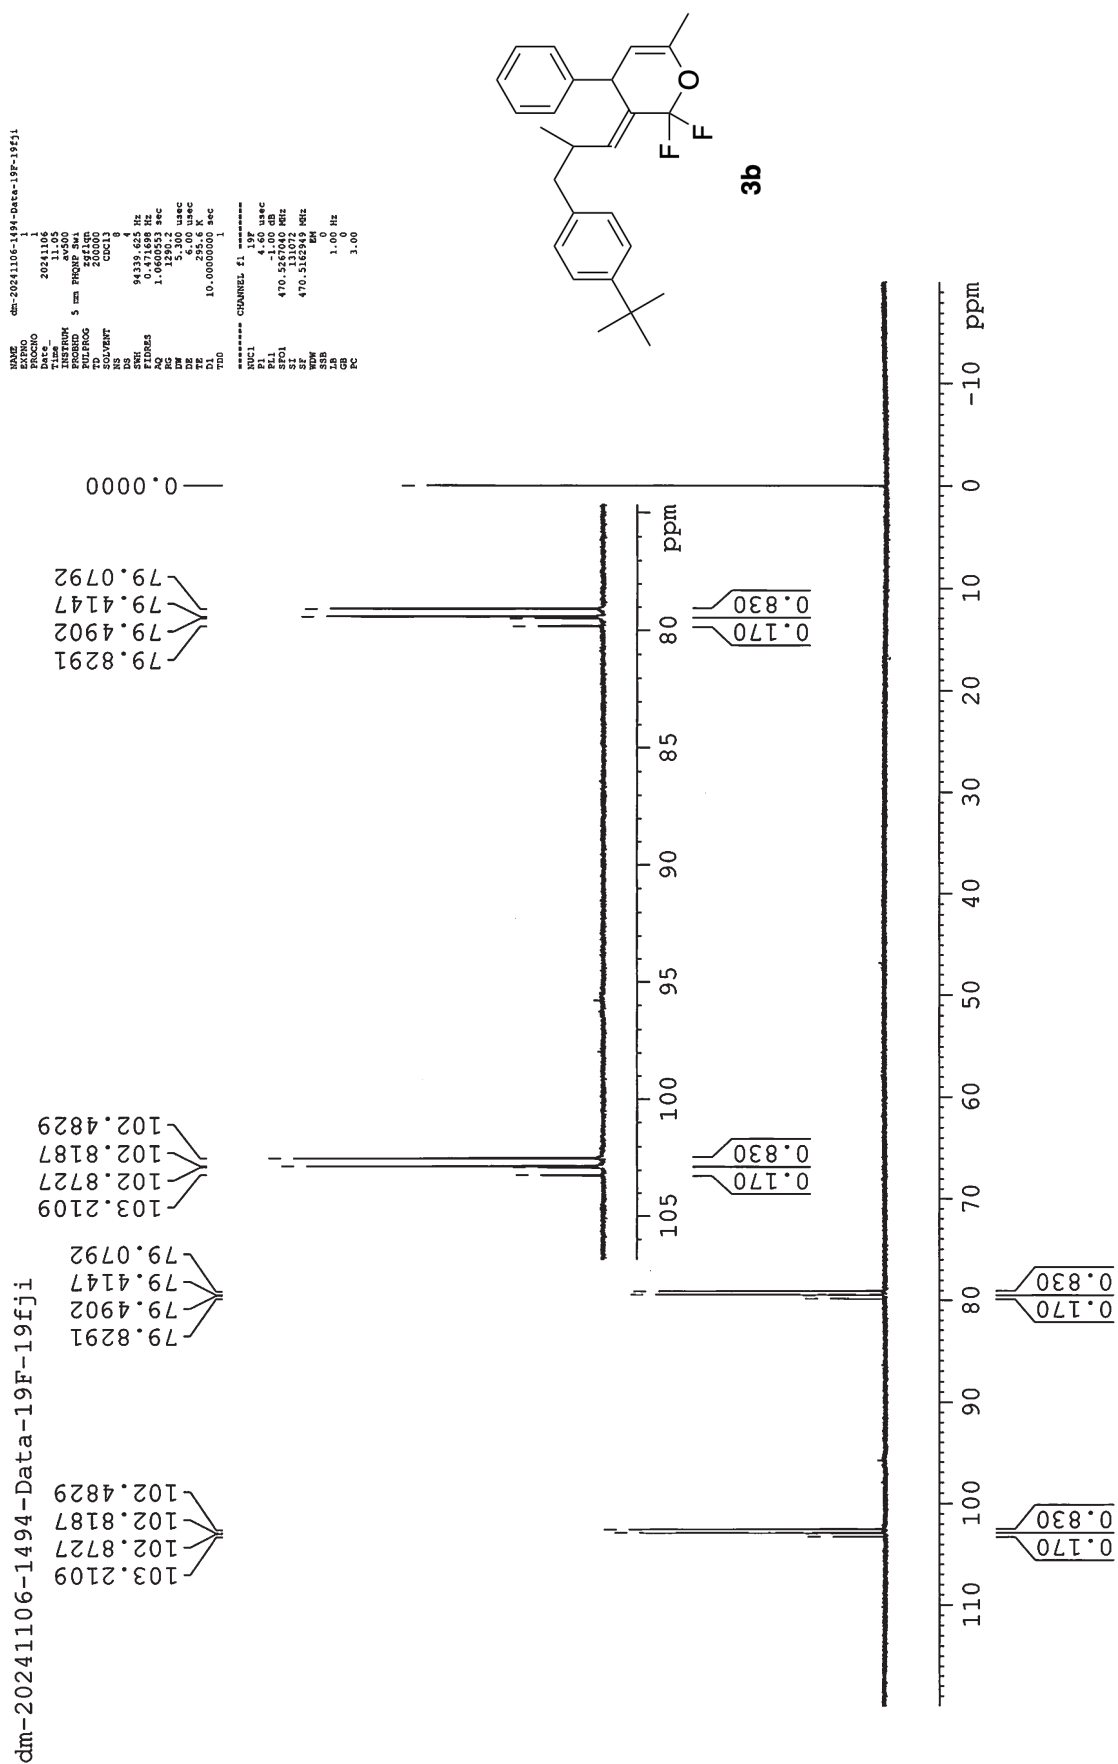

<sup>1</sup>H NMR Spectrum of 2,2-Difluoro-4,6-diphenyl-3-(4-phenylbutan-2-ylidene)-3,4-dihydro-2H-pyran **3c** (*E/Z* = 53:47)

```

dm-20241109-1502-Data-1H
NAME
EXPNO 1
PROCNO 1
Date_ 20241109
Time 10.19
INSTRUM av500
PROBHD 5 mm PICHIP S44
PULPROG zgpg30
TD 65536
SOLVENT CDCl3
NS 8
DS 4
SWH 7507.507 Hz
FIDRES 0.114555 Hz
AQ 4.18414 sec
RG 327.68
DM 66.600 usec
DE 6.00 usec
TE 300.2 K
D1 1.0000000 sec
TD0 1
===== CHANNEL f1 =====
NUC1 1H
P1 9.80 usec
PL 0.00 dB
SFO1 500.132500 MHz
SI 32768
SF 500.1300747 MHz
WDW EM
SSB 0
LB 0
GB 0
PC 10.00
  
```

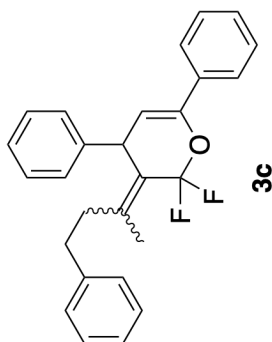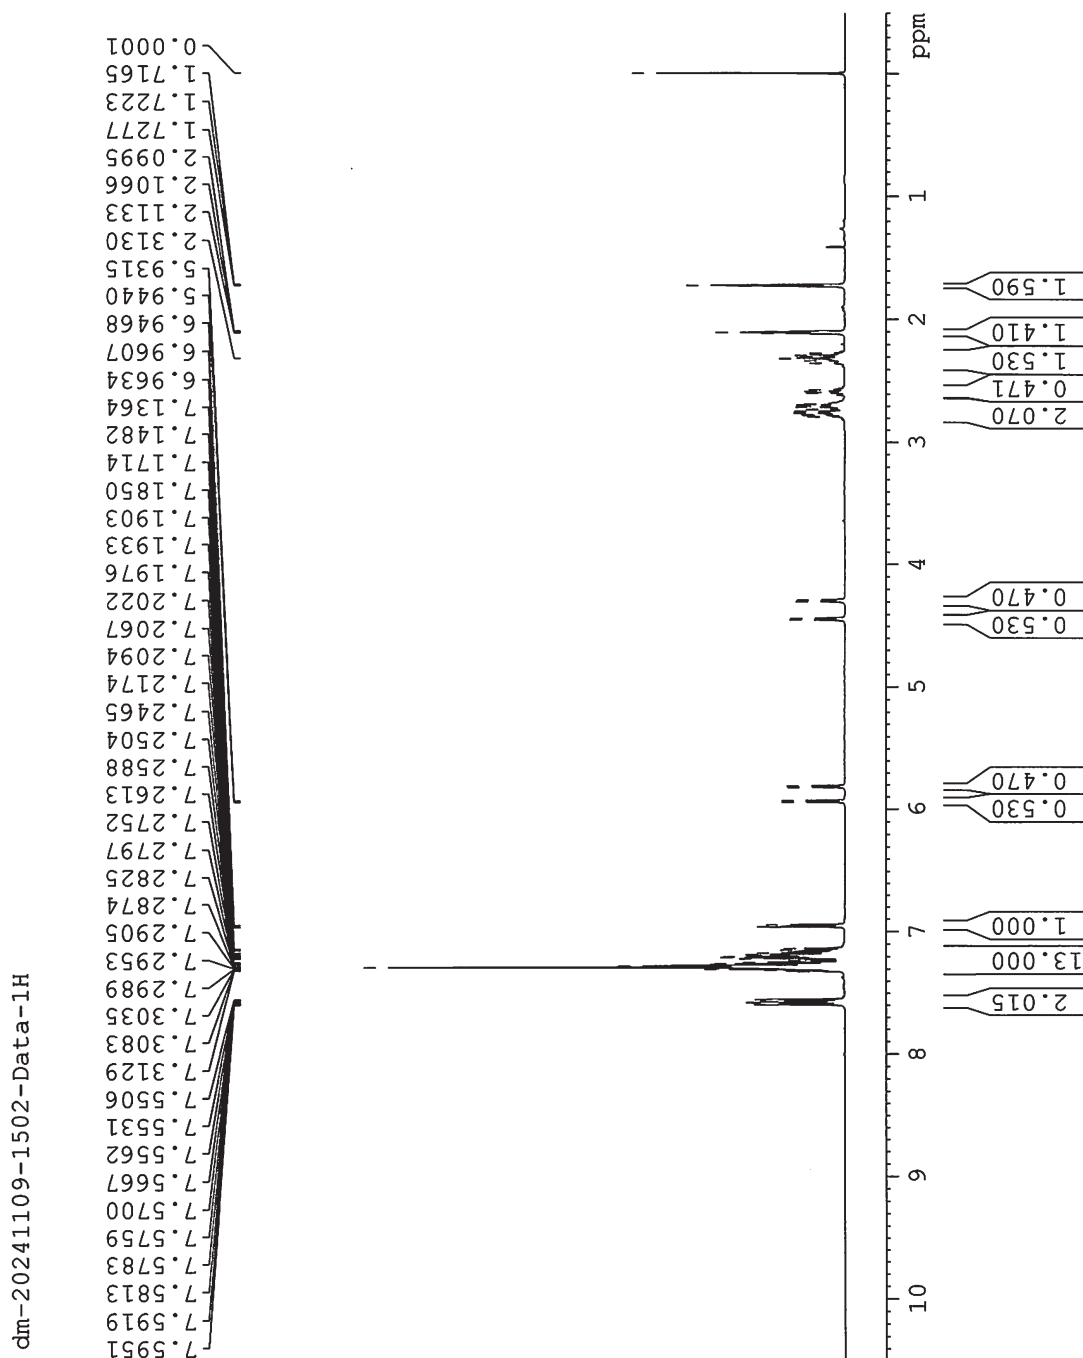

$^{13}\text{C}$  NMR Spectrum of 2,2-Difluoro-4,6-diphenyl-3-(4-phenylbutan-2-ylidene)-3,4-dihydro-2H-pyran **3c** (*E/Z* = 53:47)

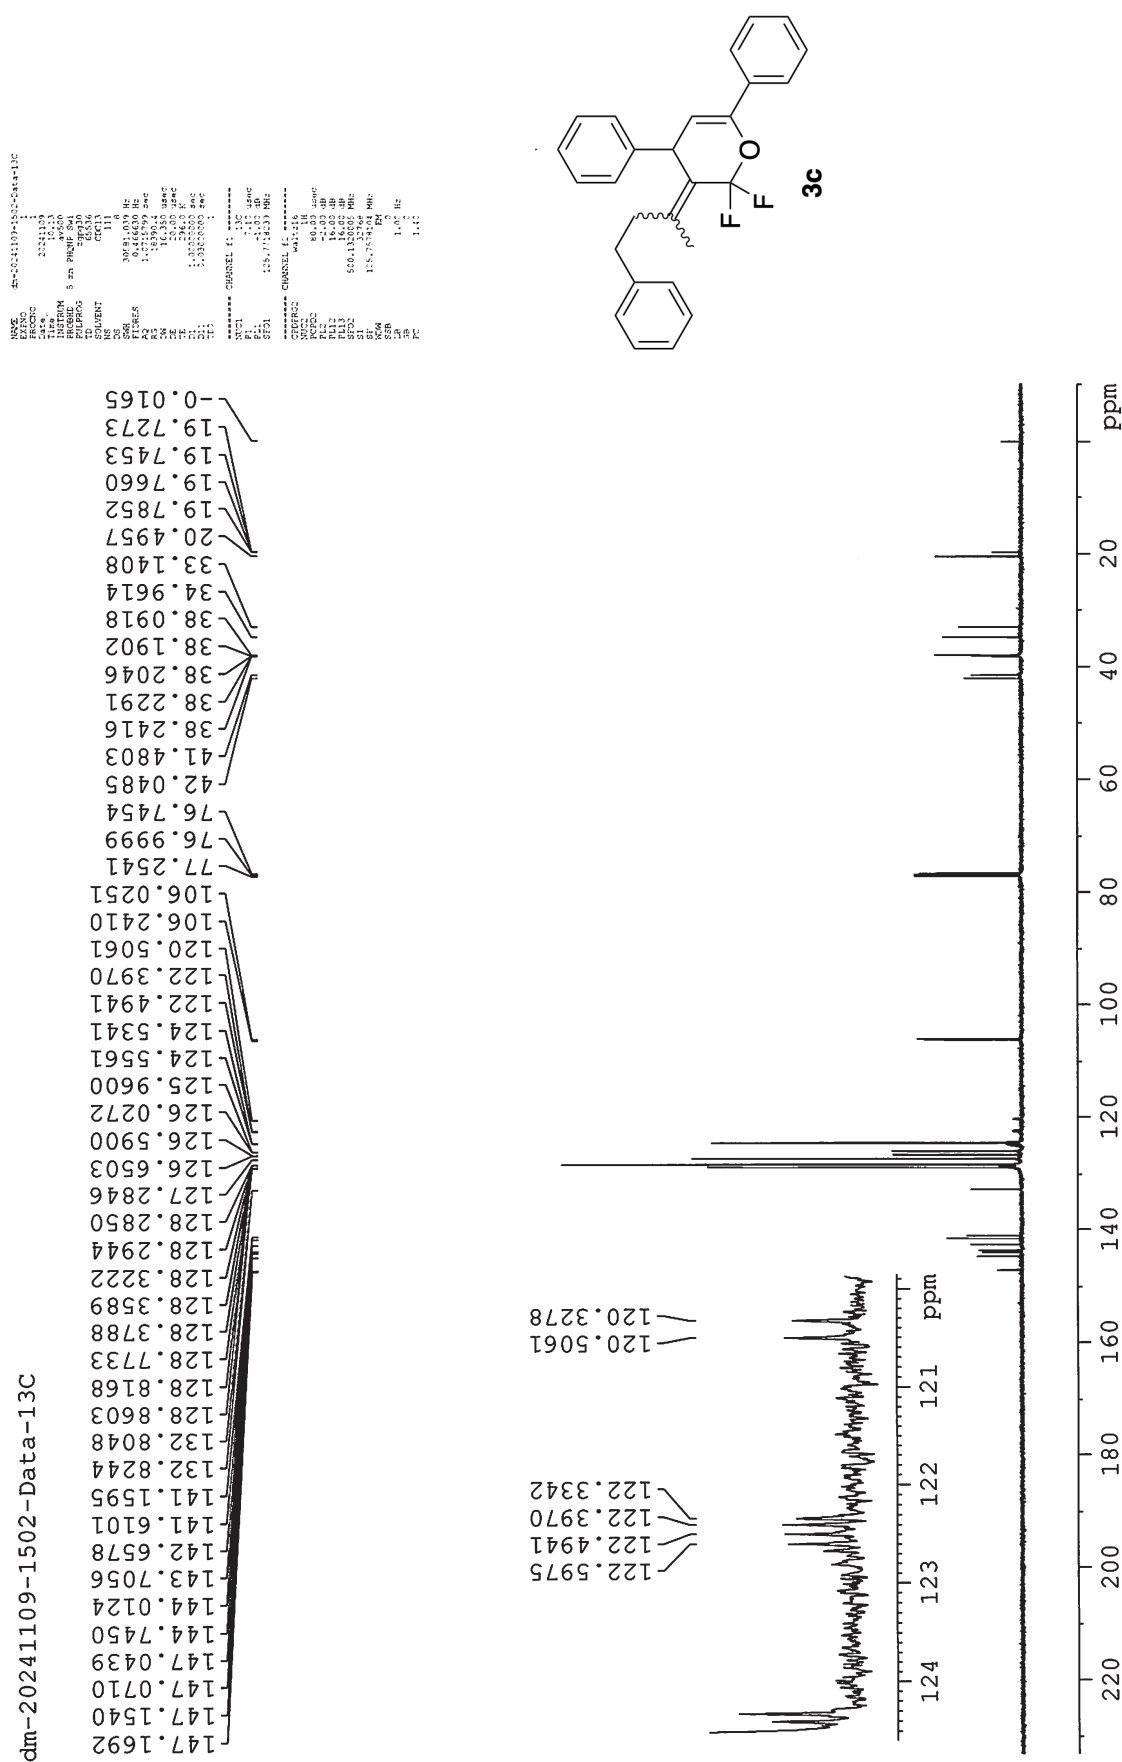

$^{19}\text{F}$  NMR Spectrum of 2,2-Difluoro-4,6-diphenyl-3-(4-phenylbutan-2-ylidene)-3,4-dihydro-2H-pyran **3c** (*E/Z* = 53:47)

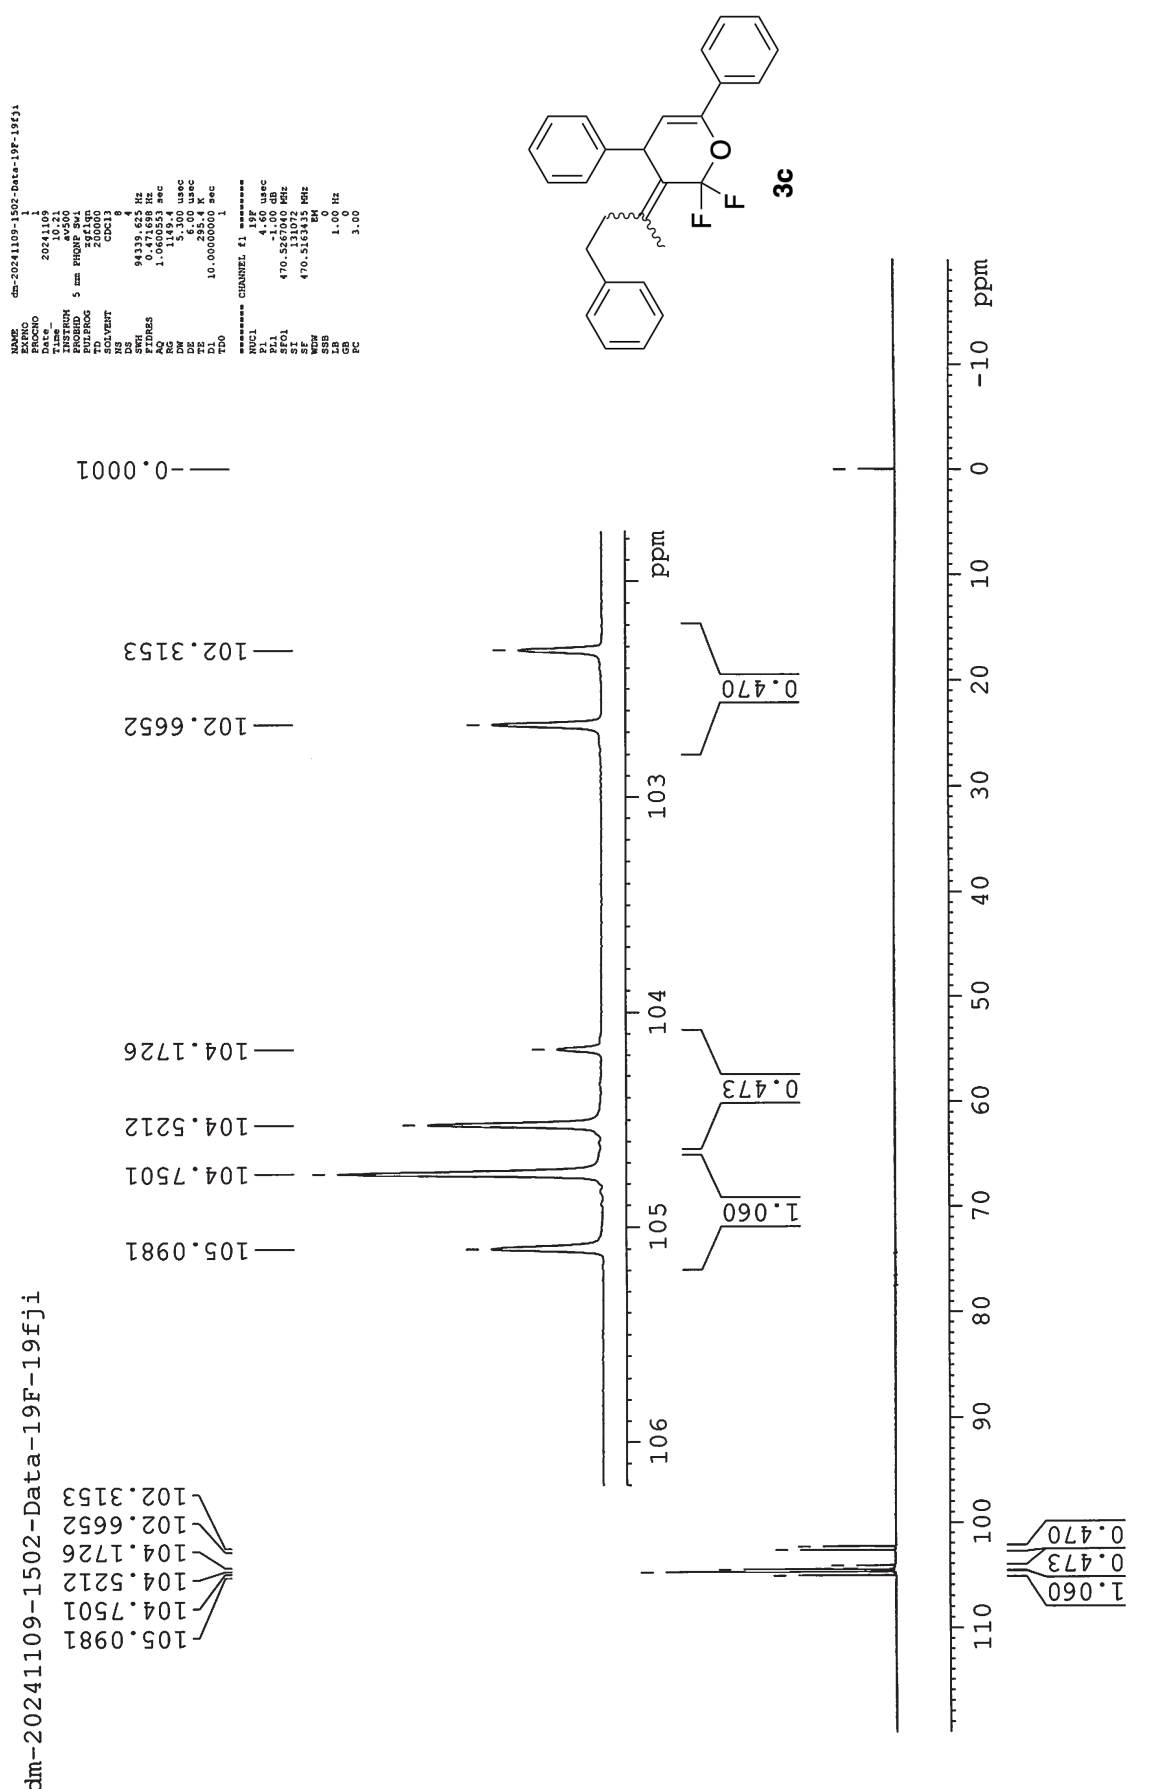

<sup>1</sup>H NMR Spectrum of (*E*)-6-Cyclohexyl-2,2-difluoro-4-phenyl-3-(3-phenylpropan-1-ylidene)-3,4-dihydro-2*H*-pyran **3d**

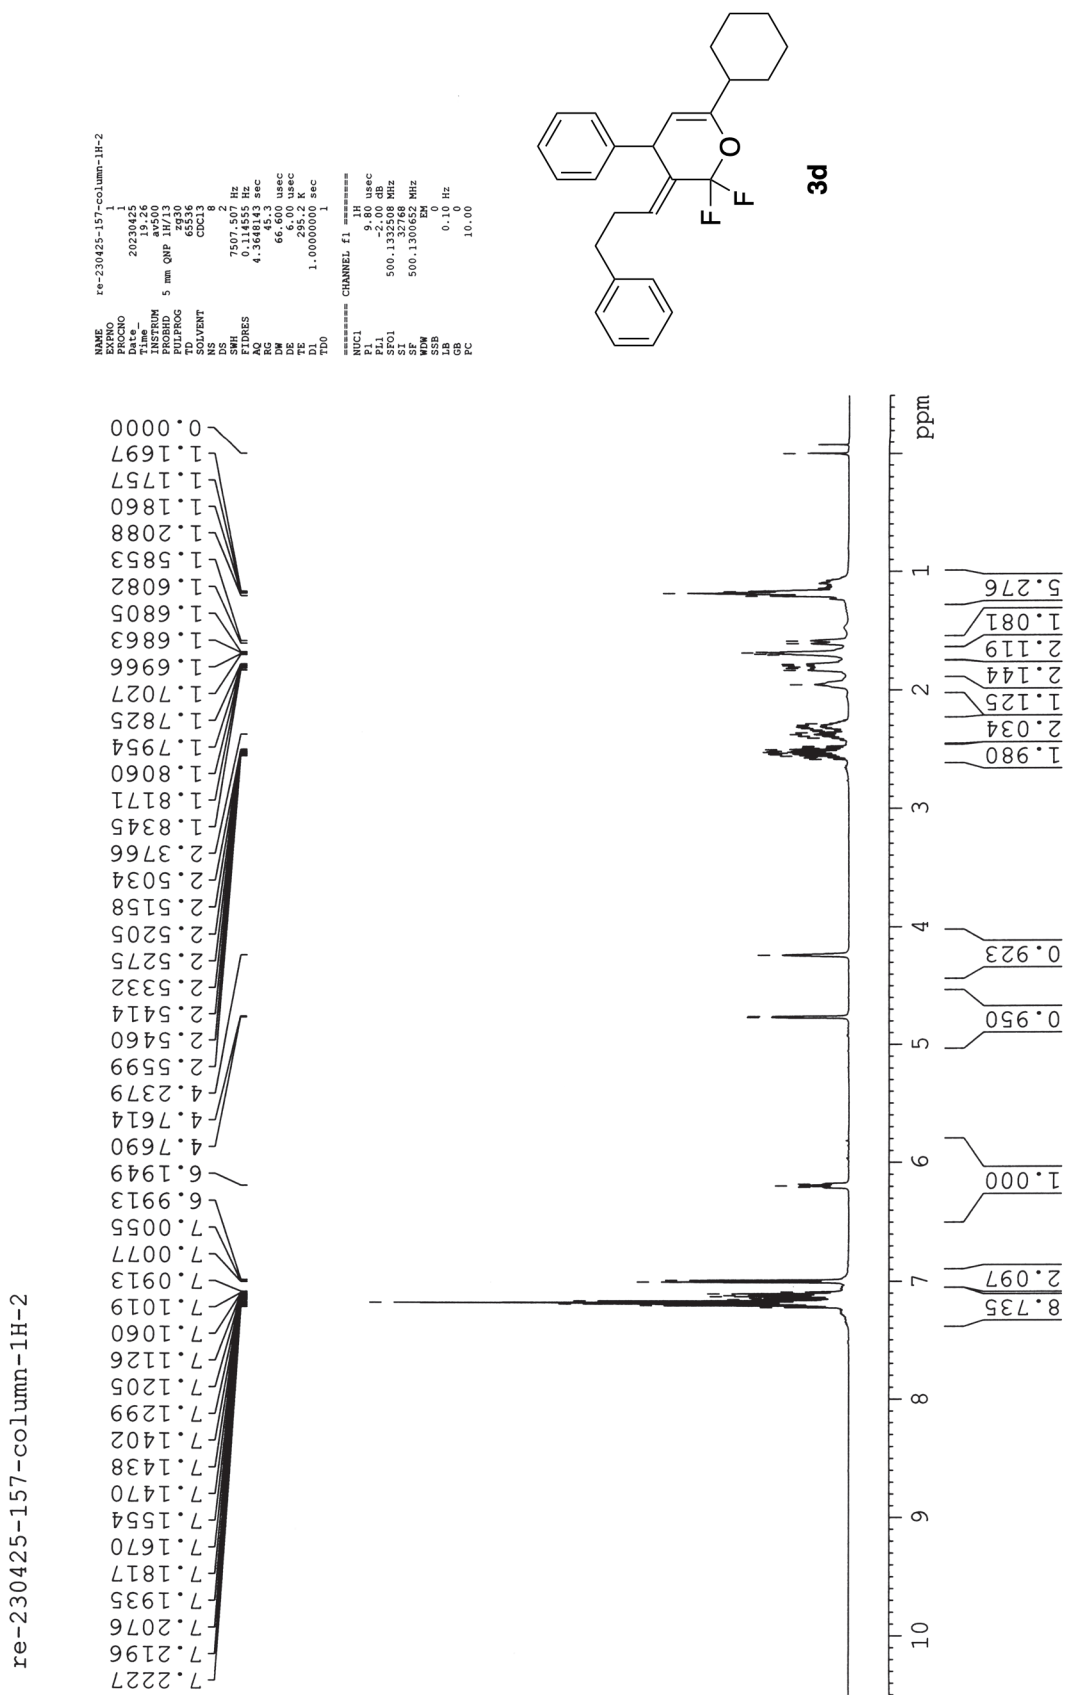





<sup>19</sup>F NMR Spectrum of (*E*)-6-Cyclohexyl-2,2-difluoro-4-phenyl-3-(3-phenylpropan-1-ylidene)-3,4-dihydro-2*H*-pyran **3d**

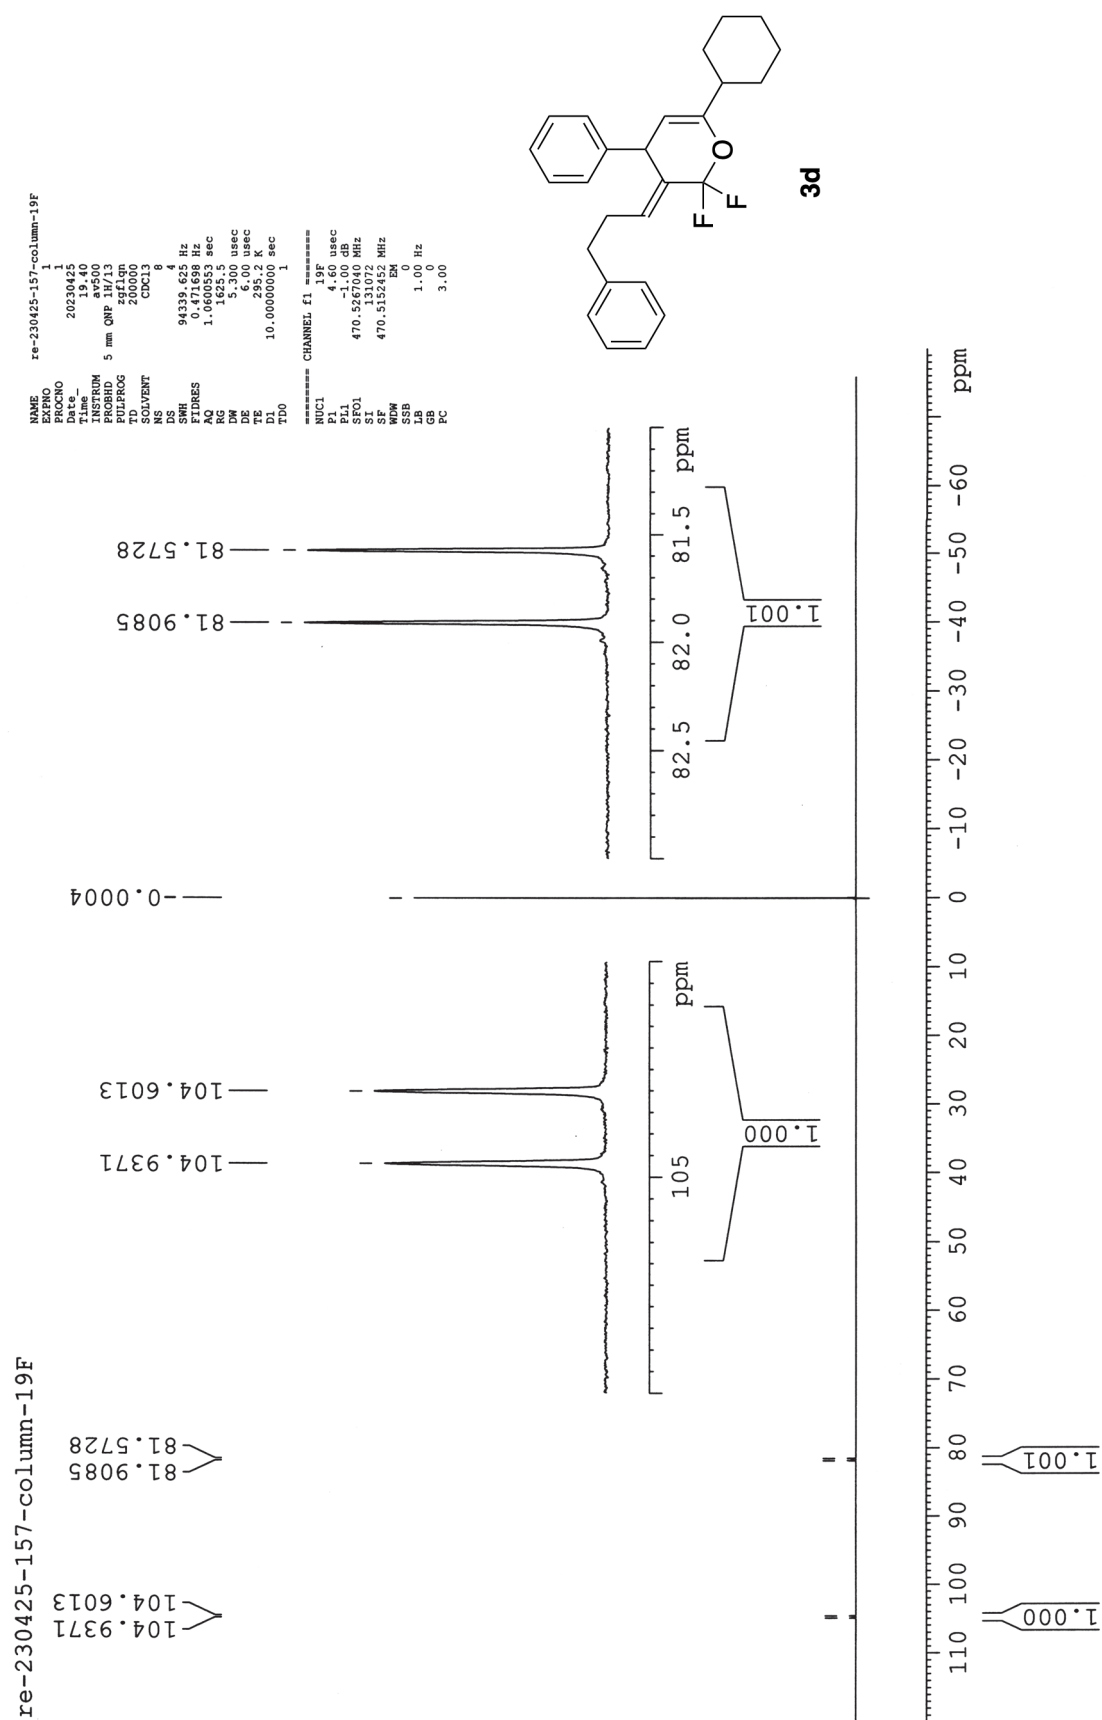

<sup>1</sup>H NMR Spectrum of (*E,E*)-2,2-Difluoro-4-phenyl-3-(3-phenylpropan-1-ylidene)-6-(2-phenylvinyl)-3,4-dihydro-2*H*-pyran **3e**

re-241031-486-column-1H

```

NAME re-241031-486-column-1H
EXPNO 1
PROCNO 1
Date_ 20241031
Time 06:00
INSTRUM spect
PROBHD 5 mm PICHIP S41
PULPROG zg30
SOLVENT CDCl3
NS 8
DS 2
SWH 7507.632 Hz
AQ 0.11455 Hz
FIDRES 4.3646143 sec
RG 64
DE 66.00 usec
TE 295.3 K
D1 1.0000000 sec
TD0 1
=====
CHANNEL f1
NUC1 1H
P1 9.00 usec
PL1 0.00 dB
SFO1 500.1322508 MHz
SI 32768
SF 500.1300000 MHz
WDW EM
SSB 0
LB 0.10 Hz
GB 0
PC 10.00
  
```

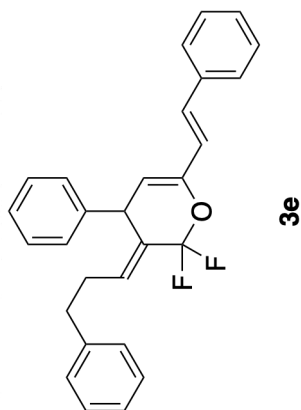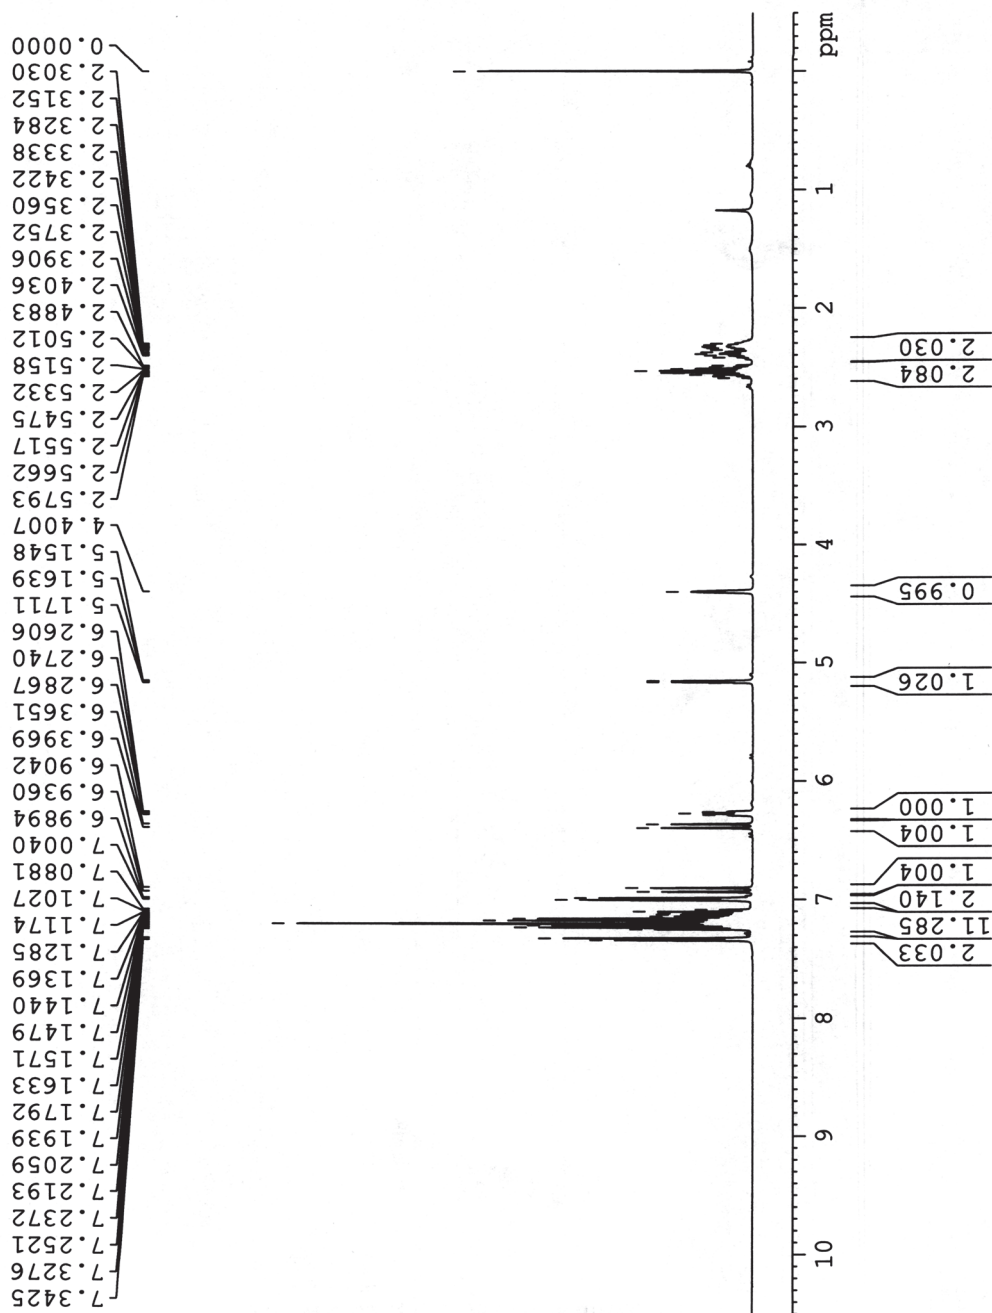



<sup>19</sup>F NMR Spectrum of (*E,E*)-2,2-Difluoro-4-phenyl-3-(3-phenylpropan-1-ylidene)-6-(2-phenylvinyl)-3,4-dihydro-2*H*-pyran **3e**

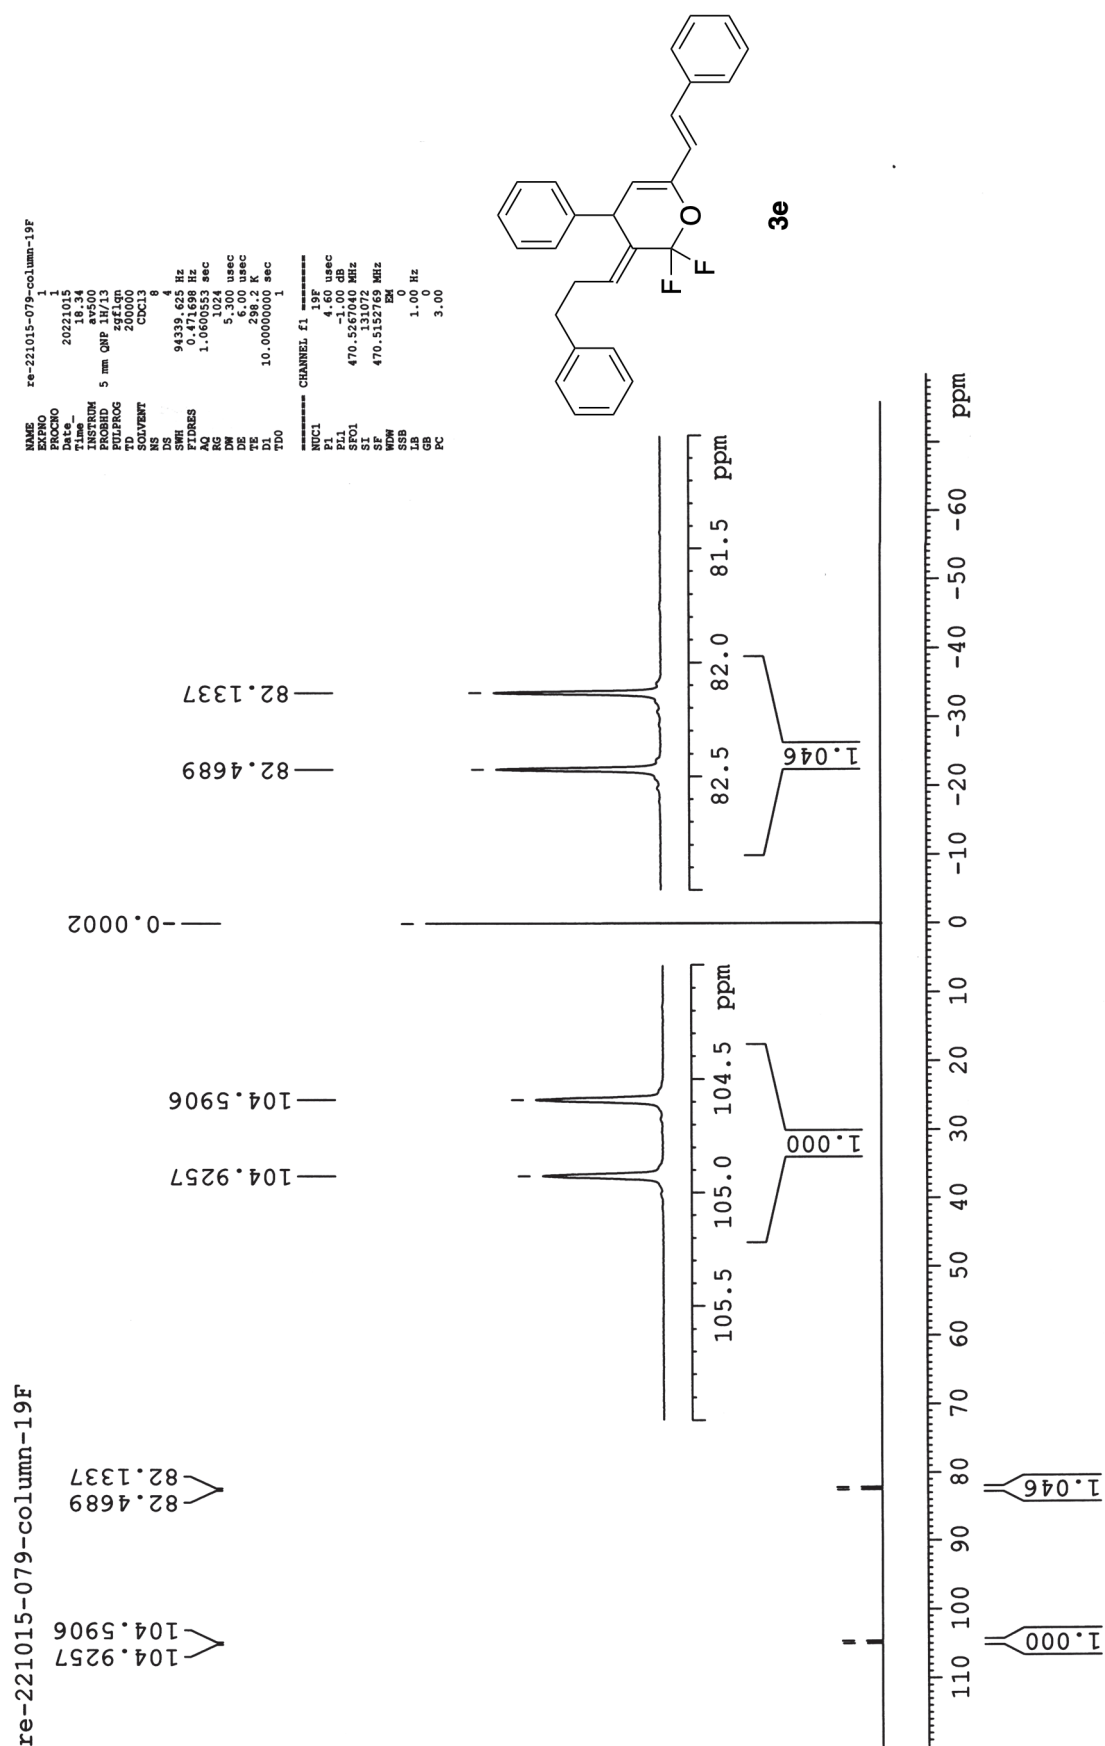

<sup>1</sup>H NMR Spectrum of (*E*)-2,2-Difluoro-4,6-diphenyl-3-(3-phenylpropan-1-ylidene)-3,4-dihydro-2*H*-pyran **3f**

re-250123-542-column-1H

```

NAME re-250123-542-column-1H
EXPNO 1
PROCNO 1
PROBHD 5 mm PHOXP SFL
PULPROG zgpg30
SOLVENT CDCl3
NS 8
DS 2
SWH 7507.507 Hz
FIDRES 0.114555 Hz
AQ 4.3648143 sec
RG 666
DE 6.00 usec
TE 299.2 K
TD 1.0000000 sec
ZG 1
===== CHANNEL f1 =====
NUC1 13C
P1 9.40 usec
PL1 -2.00 dB
SFO1 500.1332508 MHz
SF 500.1332508 MHz
WDW EM
SSB 0
GB 0
PC 10.00
  
```

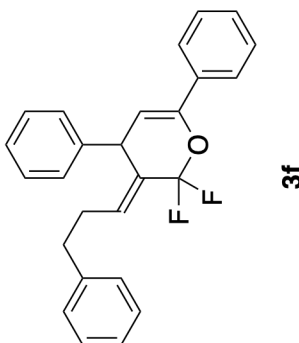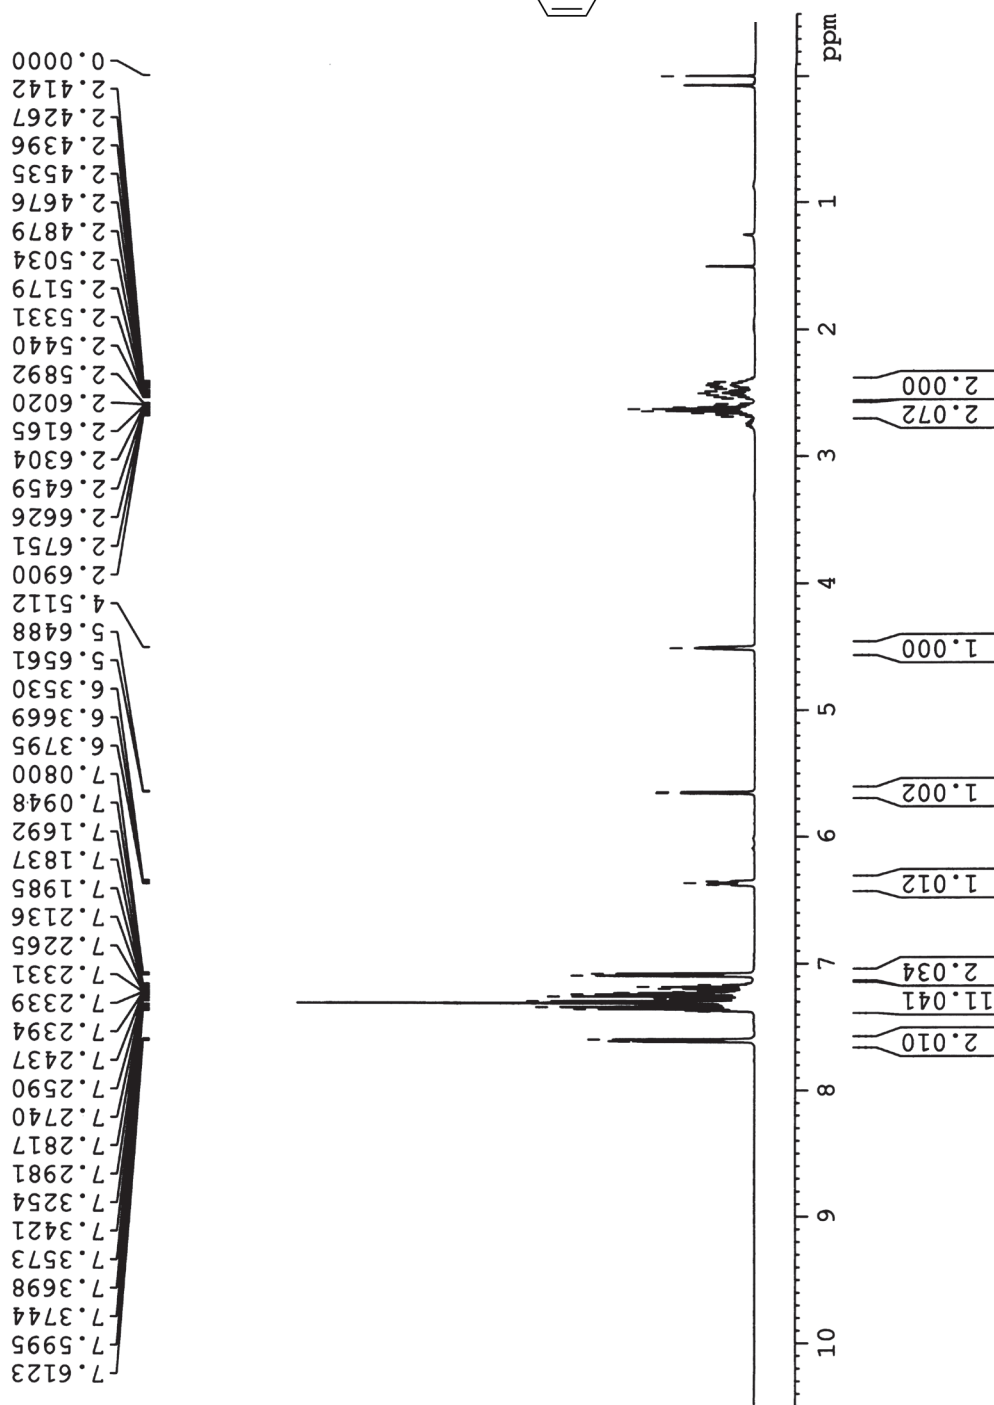

$^{13}\text{C}$  NMR Spectrum of (*E*)-2,2-Difluoro-4,6-diphenyl-3-(3-phenylpropan-1-ylidene)-3,4-dihydro-2*H*-pyran **3f**

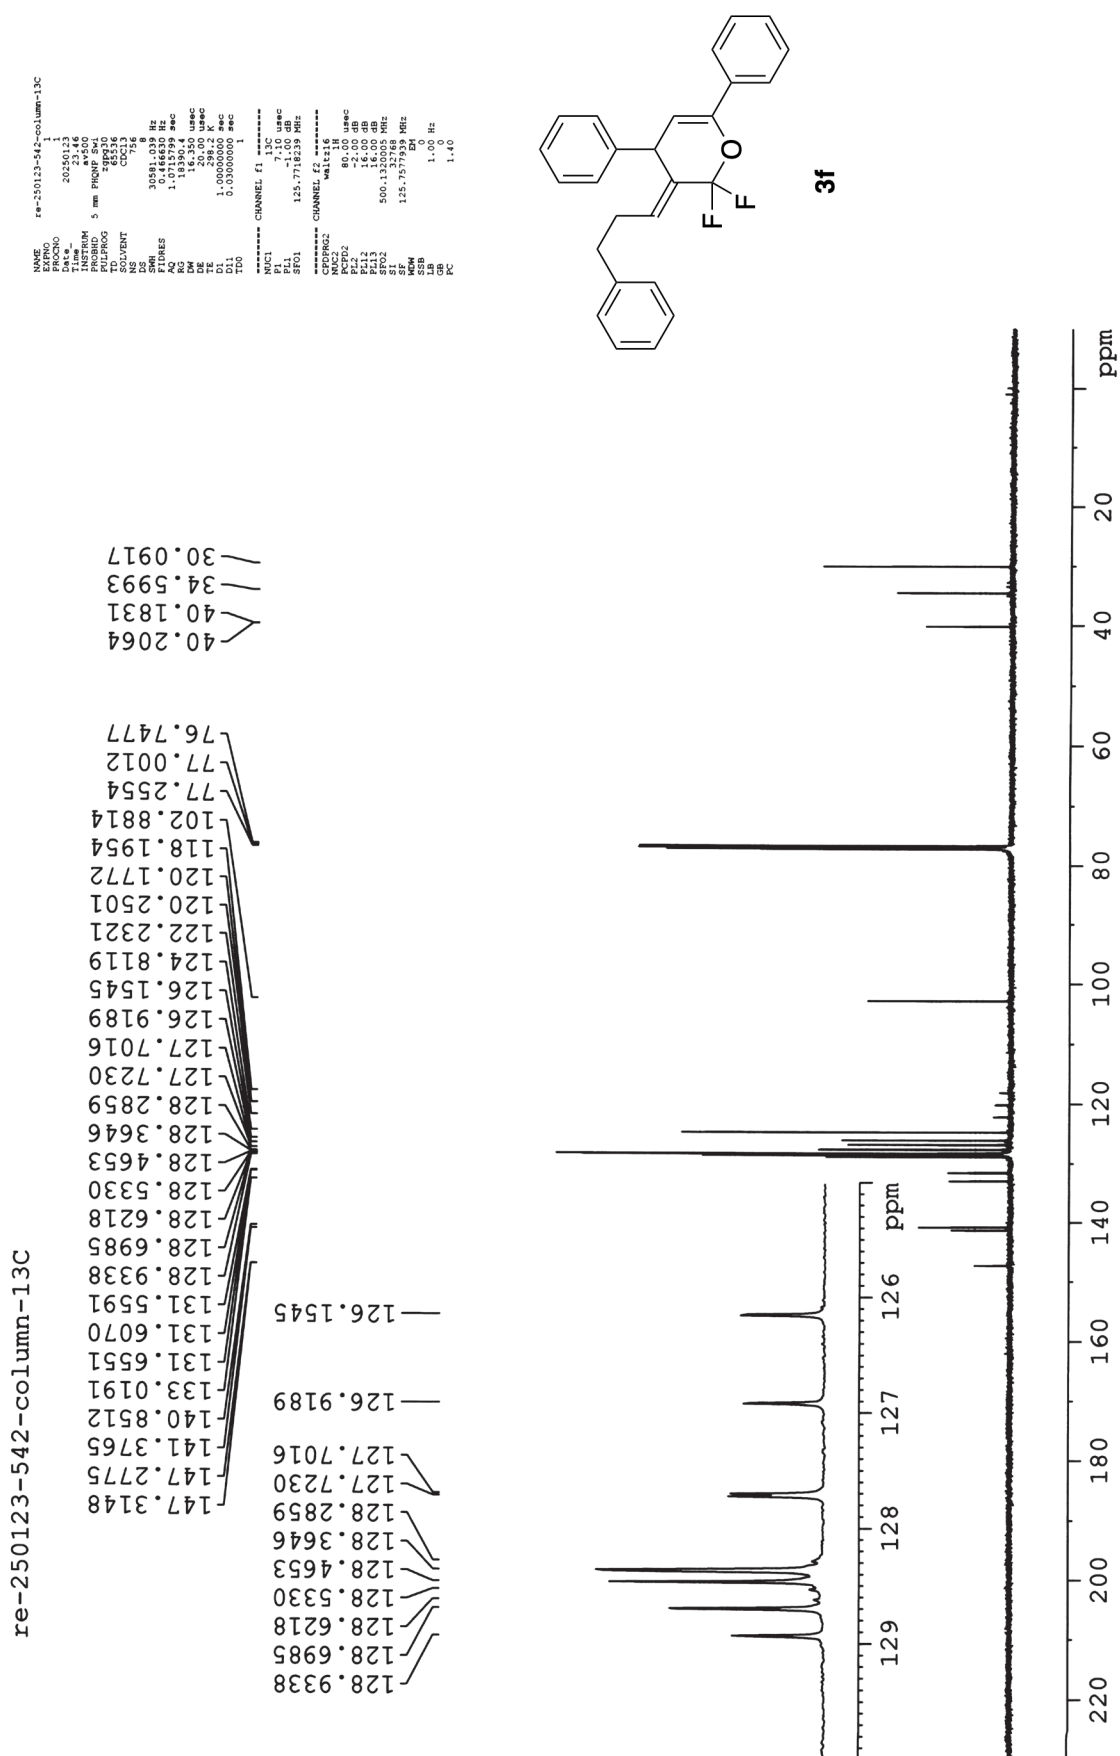

<sup>19</sup>F NMR Spectrum of (*E*)-2,2-Difluoro-4,6-diphenyl-3-(3-phenylpropan-1-ylidene)-3,4-dihydro-2*H*-pyran **3f**

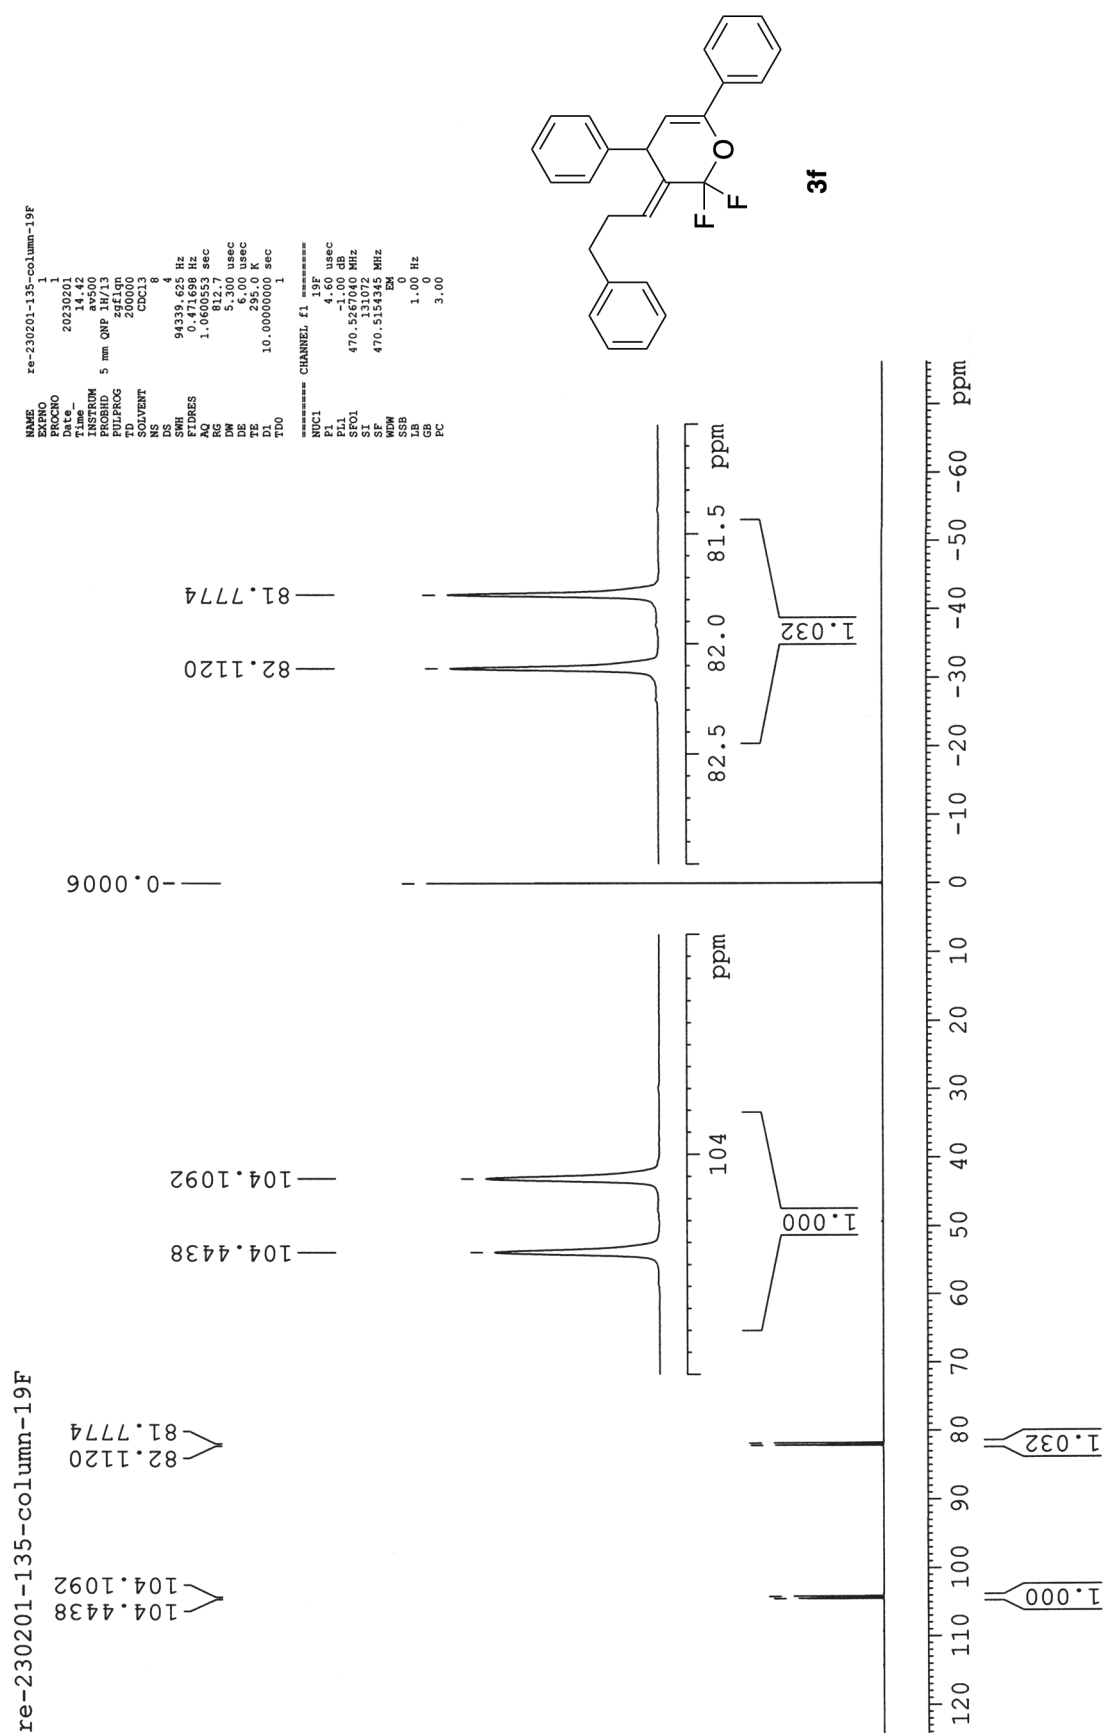



<sup>1</sup>H NMR Spectrum of (*E*)-2,2-Difluoro-6-(4-methylphenyl)-4-phenyl-3-(3-phenylpropan-1-ylidene)-3,4-dihydro-2*H*-pyran **3g**

re-230426-159-column-1H

```

NAME re-230426-159-column-1H
EXPNO 1
PROCNO 1
PROCPS 2023426
Time 19.36
INSTRUM av500
PROBHD 5 mm QNP 1H/13
PULPROG zgpg30
TD 65536
SOLVENT CDCl3
NS 8
DS 2
SWH 7507.507 Hz
FIDRES 0.114555 Hz
AQ 4.3649143 sec
RG 662.000
DM 662.000 usec
DE 6.00 usec
TE 295.3 K
TD0 1.0000000 sec
===== CHANNEL f1 =====
NUC1 13C
P1 9.80 usec
PL1 -2.00 dB
SFO1 500.132508 MHz
SF 500.1300963 MHz
WDW EM
SSB 0
GB 0
PC 10.00
    
```

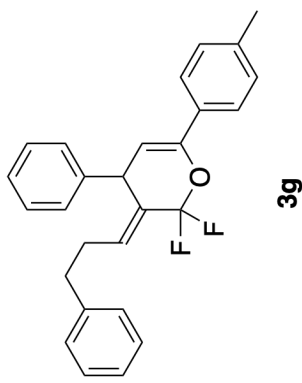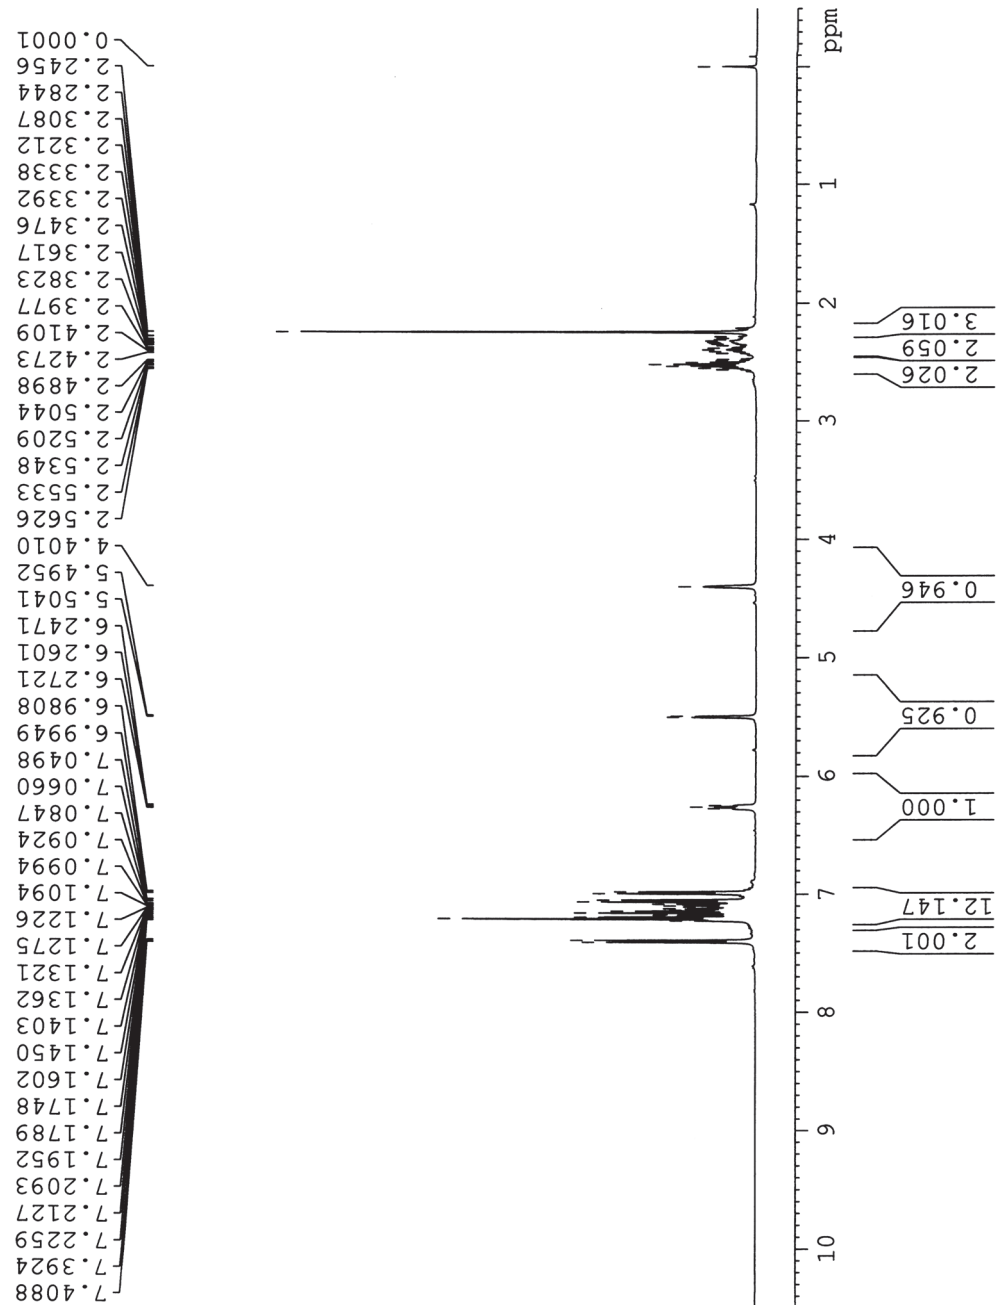



<sup>19</sup>F NMR Spectrum of (*E*)-2,2-Difluoro-6-(4-methylphenyl)-4-phenyl-3-(3-phenylpropan-1-ylidene)-3,4-dihydro-2*H*-pyran **3g**

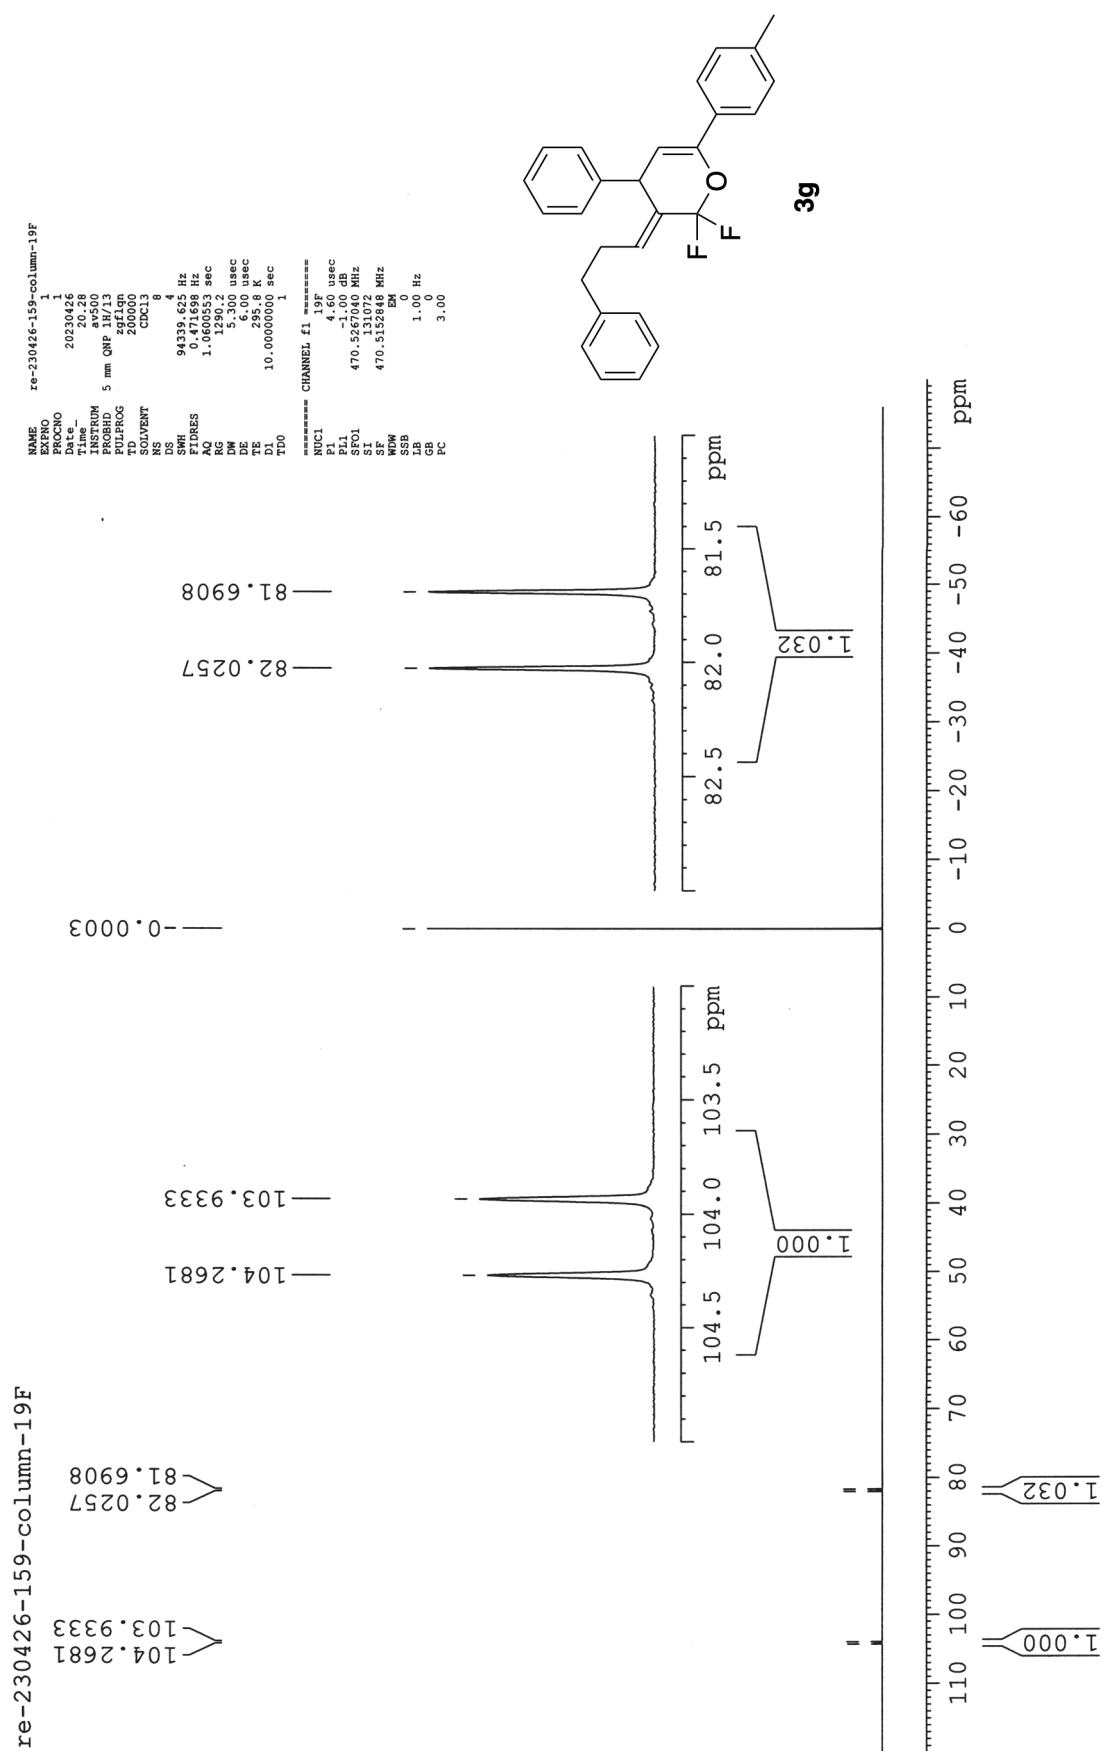

<sup>1</sup>H NMR Spectrum of (*E*)-6-(4-Chlorophenyl)-2,2-difluoro-4-phenyl-3-(3-phenylpropan-1-ylidene)-3,4-dihydro-2*H*-pyran **3h**

re-230424-156-column-1H

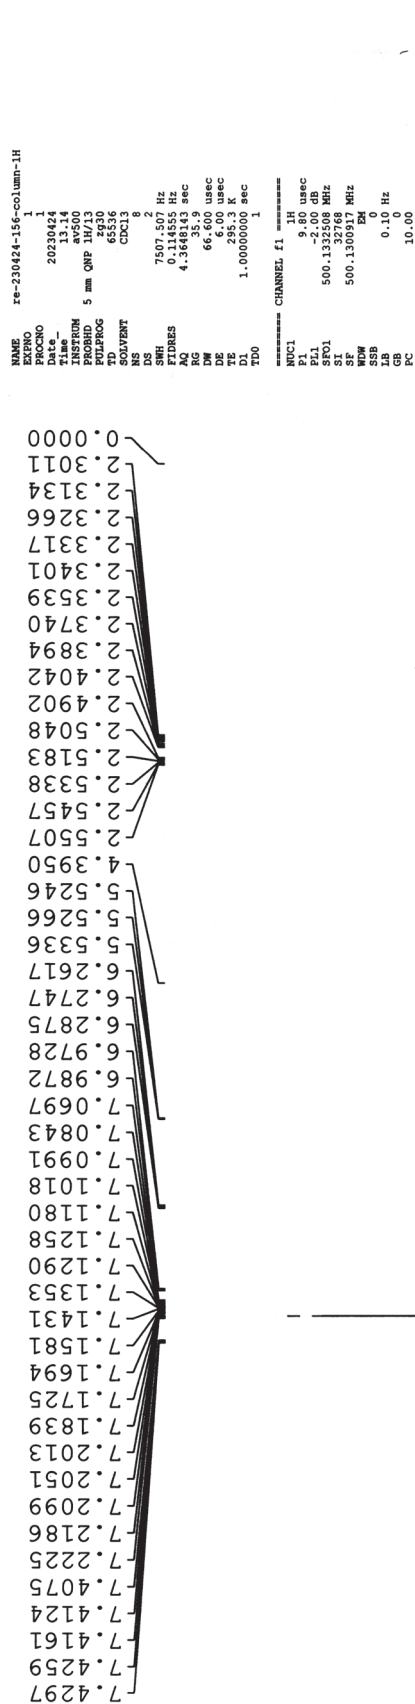





<sup>1</sup>H NMR Spectrum of (*E*)-2,2-Difluoro-6-(4-nitrophenyl)-4-phenyl-3-(3-phenylpropan-1-ylidene)-3,4-dihydro-2*H*-pyran **3i**

re-230427-158-column-1H

```

NAME re-230427-158-column-1H
EXPNO 1
PROCNO 1
Date_ 20230427
Time 16:53
INSTRUM spect
PROBHD 5 mm QNP 1H/13
PULPROG zgpg30
TD 65536
SOLVENT CDCl3
NS 8
DS 2
AQ 750.1562 Hz
F2 132.9053 MHz
AQ 4.3648143 sec
RG 66.000 usec
DE 71.8 usec
TE 295.3 K
TD0 1.0000000 sec
===== CHANNEL f1 =====
NUC1 13C
P1 9.00 usec
PL1 -2.00 dB
SFO1 500.132508 MHz
SI 32768
WDW EM
SSB 0
GB 0
PC 10.00
  
```

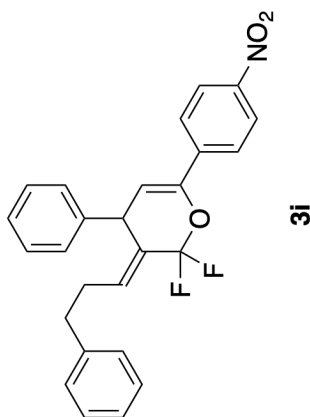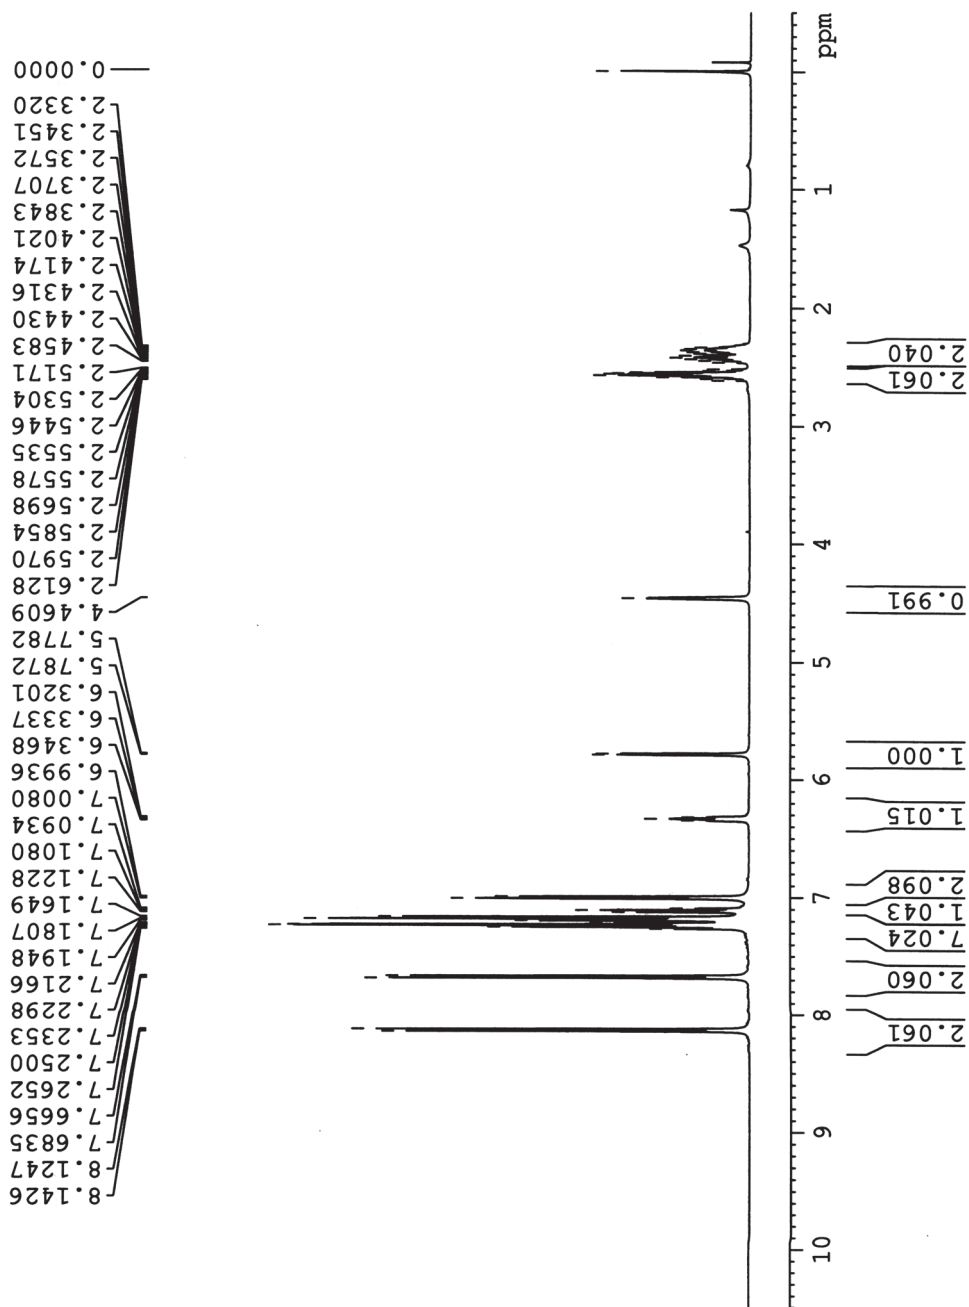

$^{13}\text{C}$  NMR Spectrum of (*E*)-2,2-Difluoro-6-(4-nitrophenyl)-4-phenyl-3-(3-phenylpropan-1-ylidene)-3,4-dihydro-2*H*-pyran **3i**

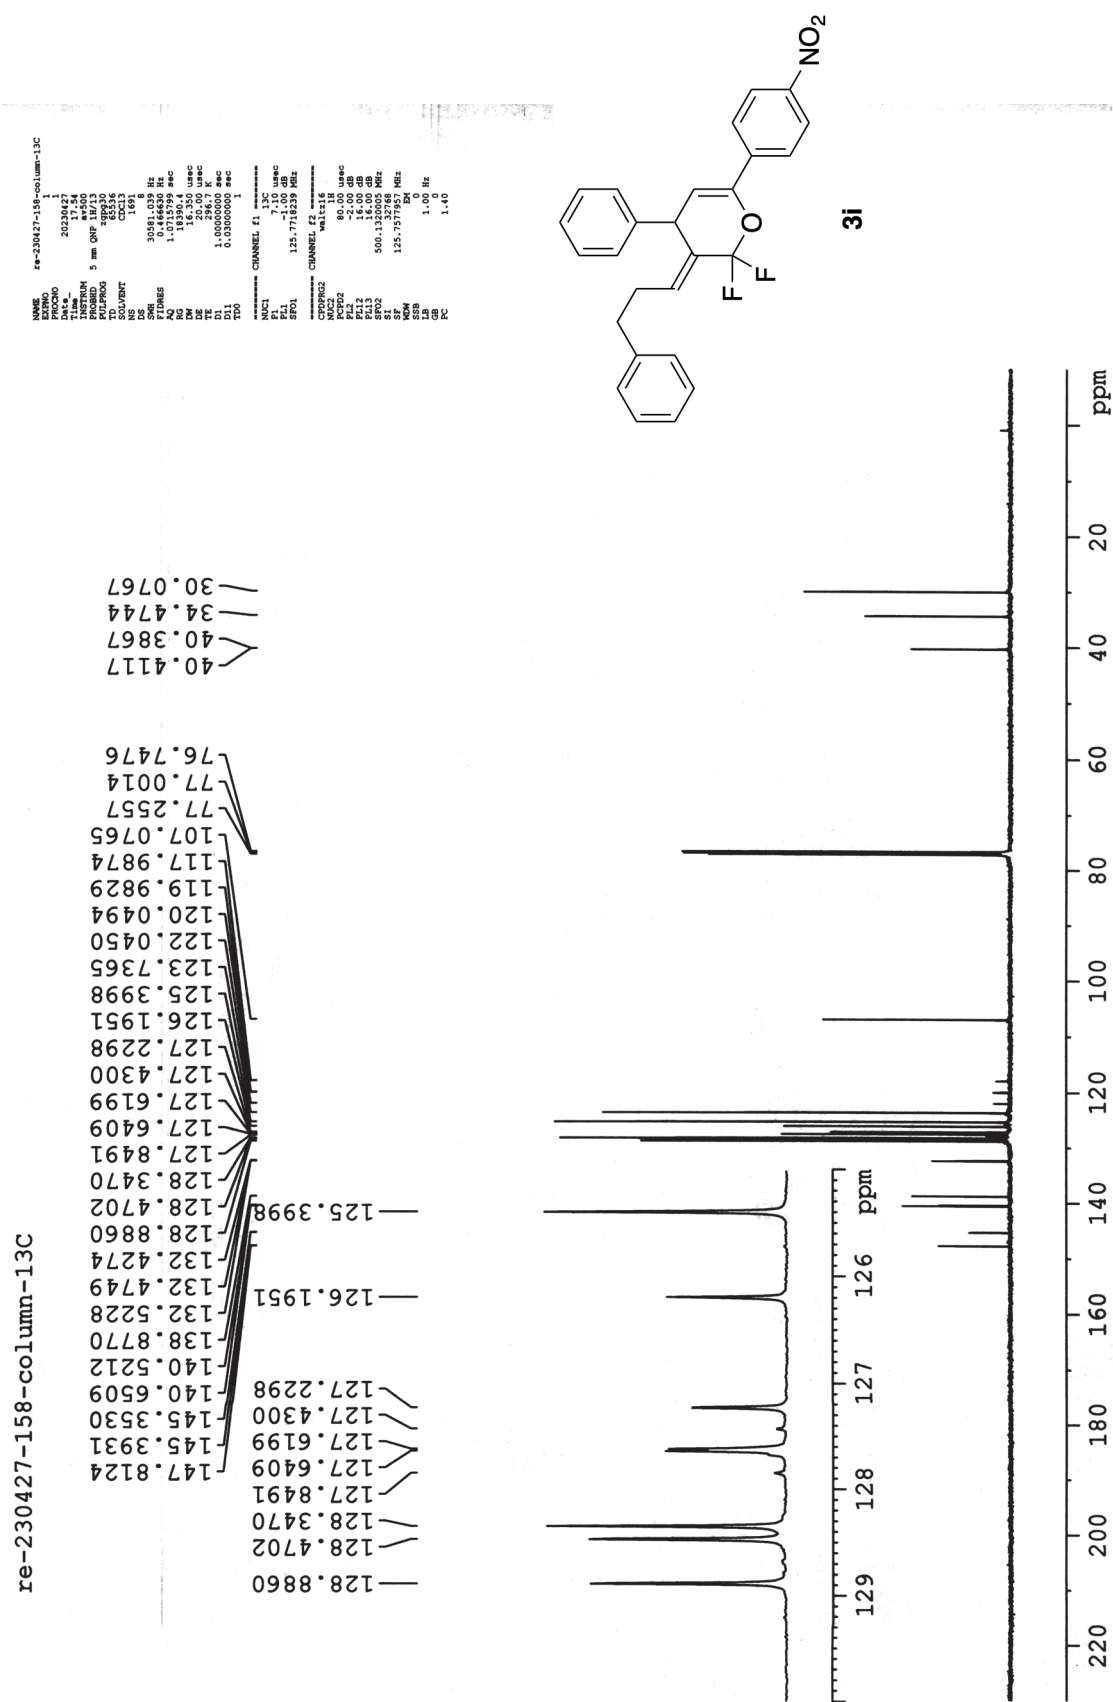



<sup>19</sup>F NMR Spectrum of (*E*)-2,2-Difluoro-6-(4-nitrophenyl)-4-phenyl-3-(3-phenylpropan-1-ylidene)-3,4-dihydro-2*H*-pyran **3i**

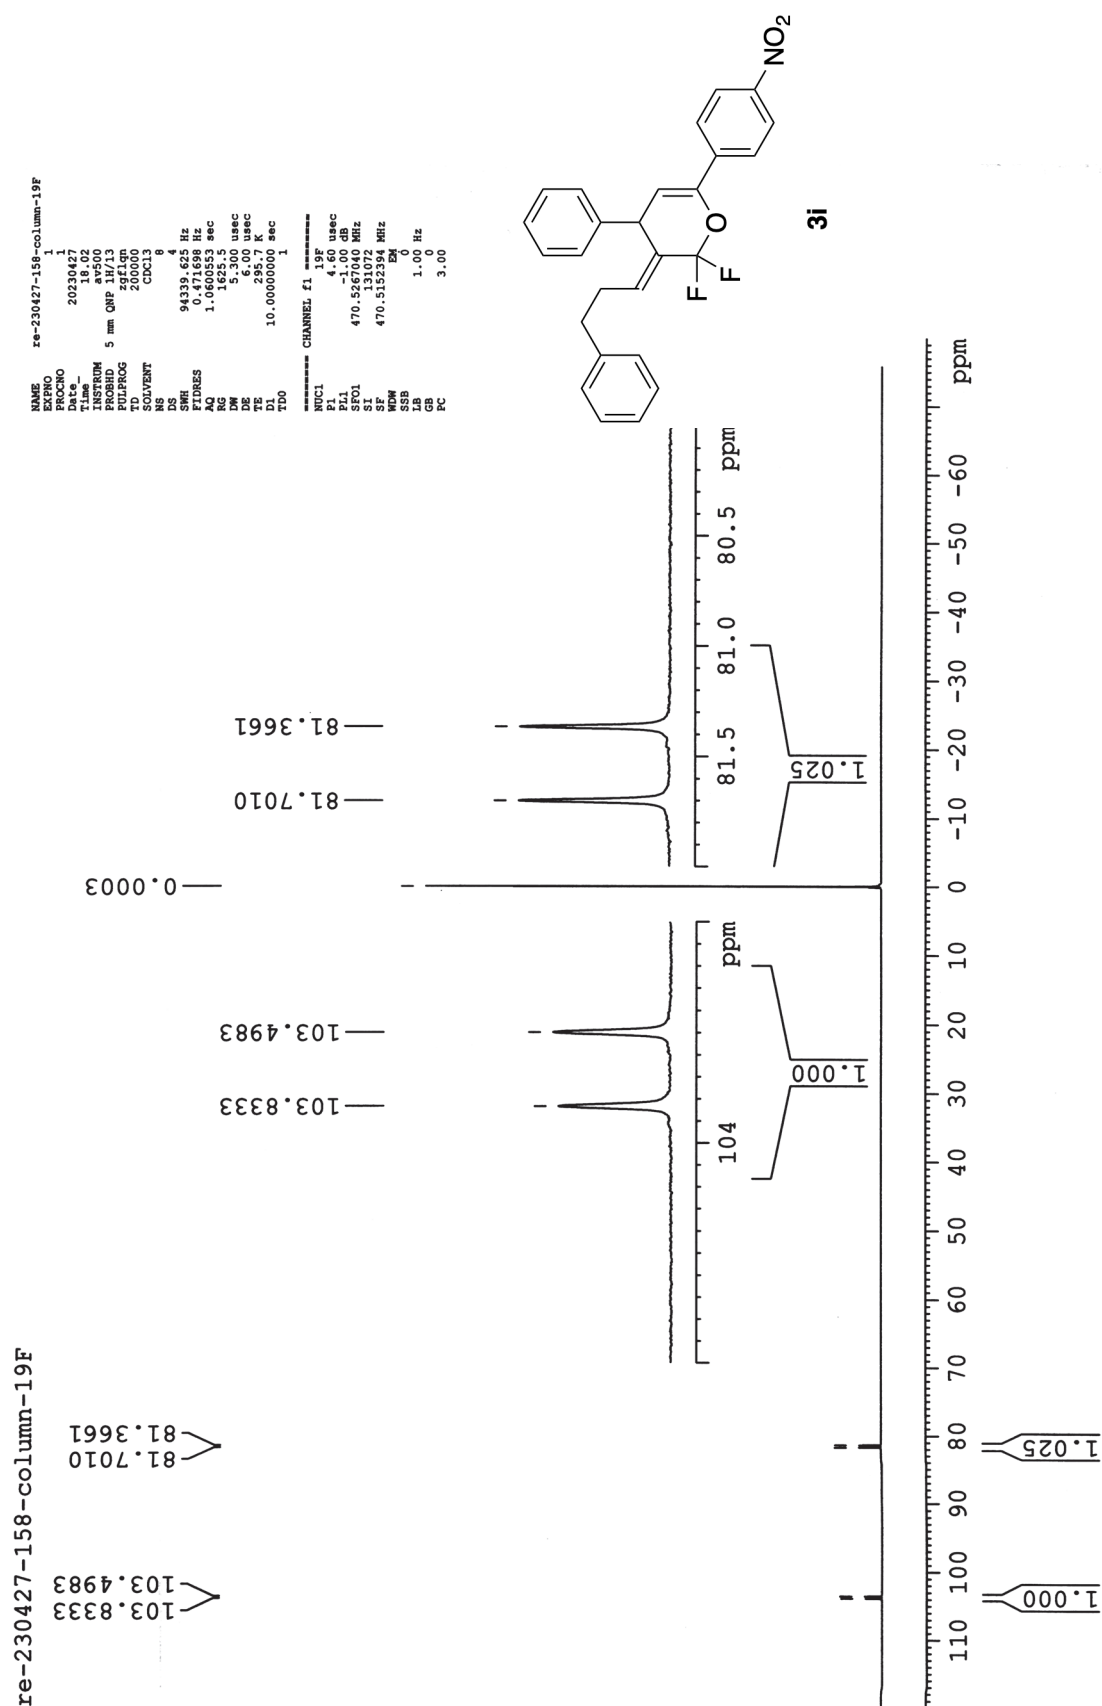

<sup>1</sup>H NMR Spectrum of (*E*)-2,2-Difluoro-4-(4-methylphenyl)-6-phenyl-3-(3-phenylpropan-1-ylidene)-3,4-dihydro-2*H*-pyran **3j**

re-230307-145-column-1H

```

NAME re-230307-145-column-1H
EXPNO 1
PROCNO 1
Date_ 20230307
Time 13.18
INSTRUM av500
PROBHD 5 mm QNP 1H/13
PULPROG zgpg30
TD 65536
SOLVENT CDCl3
NS 8
DS 2
SWH 7507.507 Hz
FIDRES 0.11455 Hz
AQ 4.3646143 sec
RG 327.5
DM 667.600 usec
DE 6.00 usec
TE 300.2 K
TD0 1.0000000 sec
===== CHANNEL f1 =====
NUC1 13C
P1 9.80 usec
PL1 -2.00 dB
SFO1 500.1325000 MHz
SF 500.1301186 MHz
WDW EM
GB 0
PC 10.00
  
```

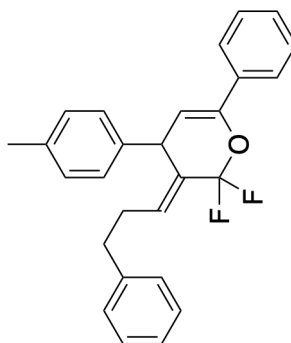

**3j**

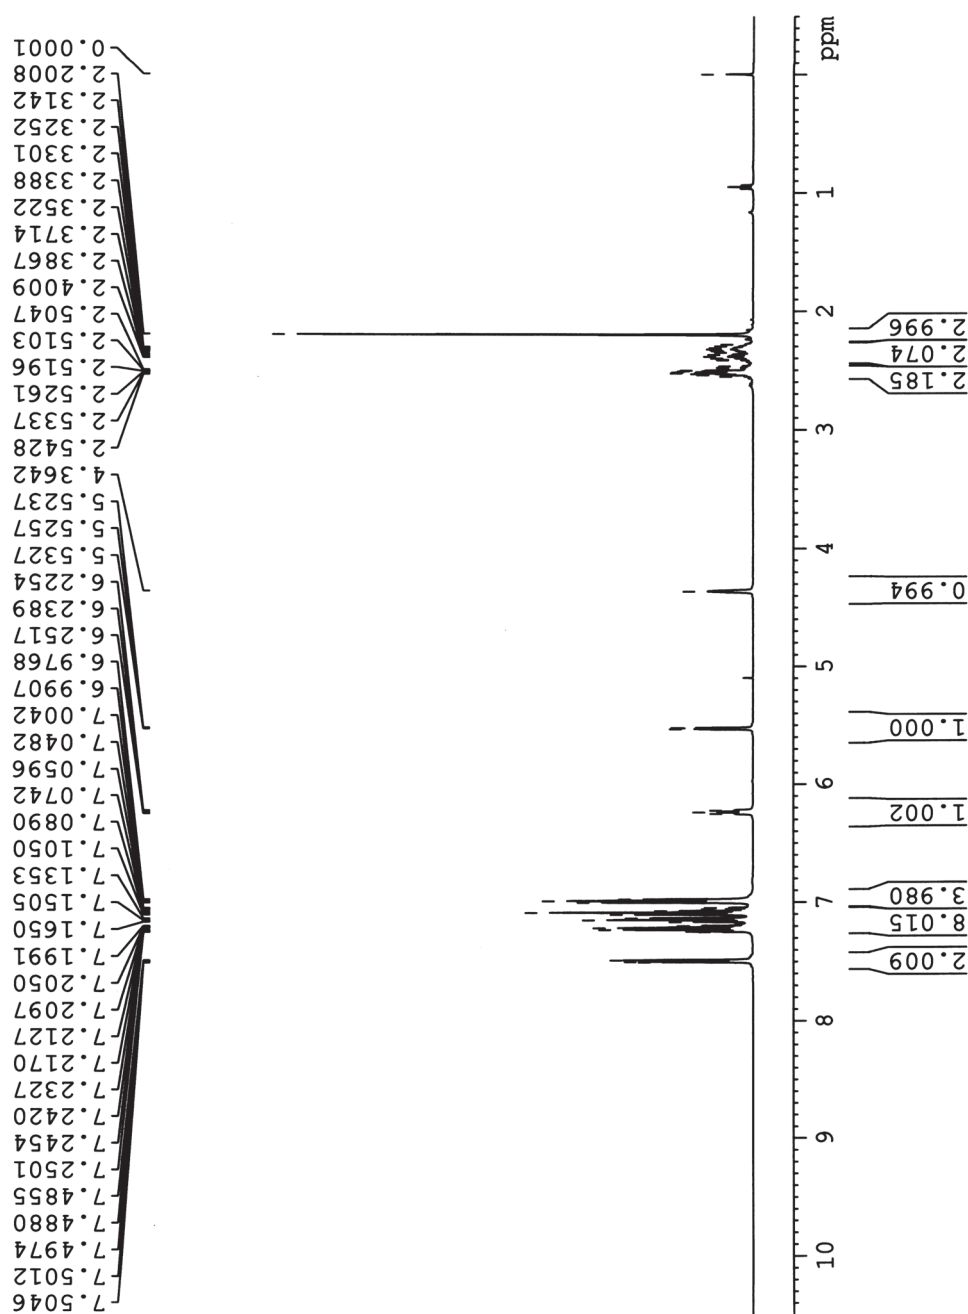



<sup>19</sup>F NMR Spectrum of (*E*)-2,2-Difluoro-4-(4-methylphenyl)-6-phenyl-3-(3-phenylpropan-1-ylidene)-3,4-dihydro-2*H*-pyran **3j**

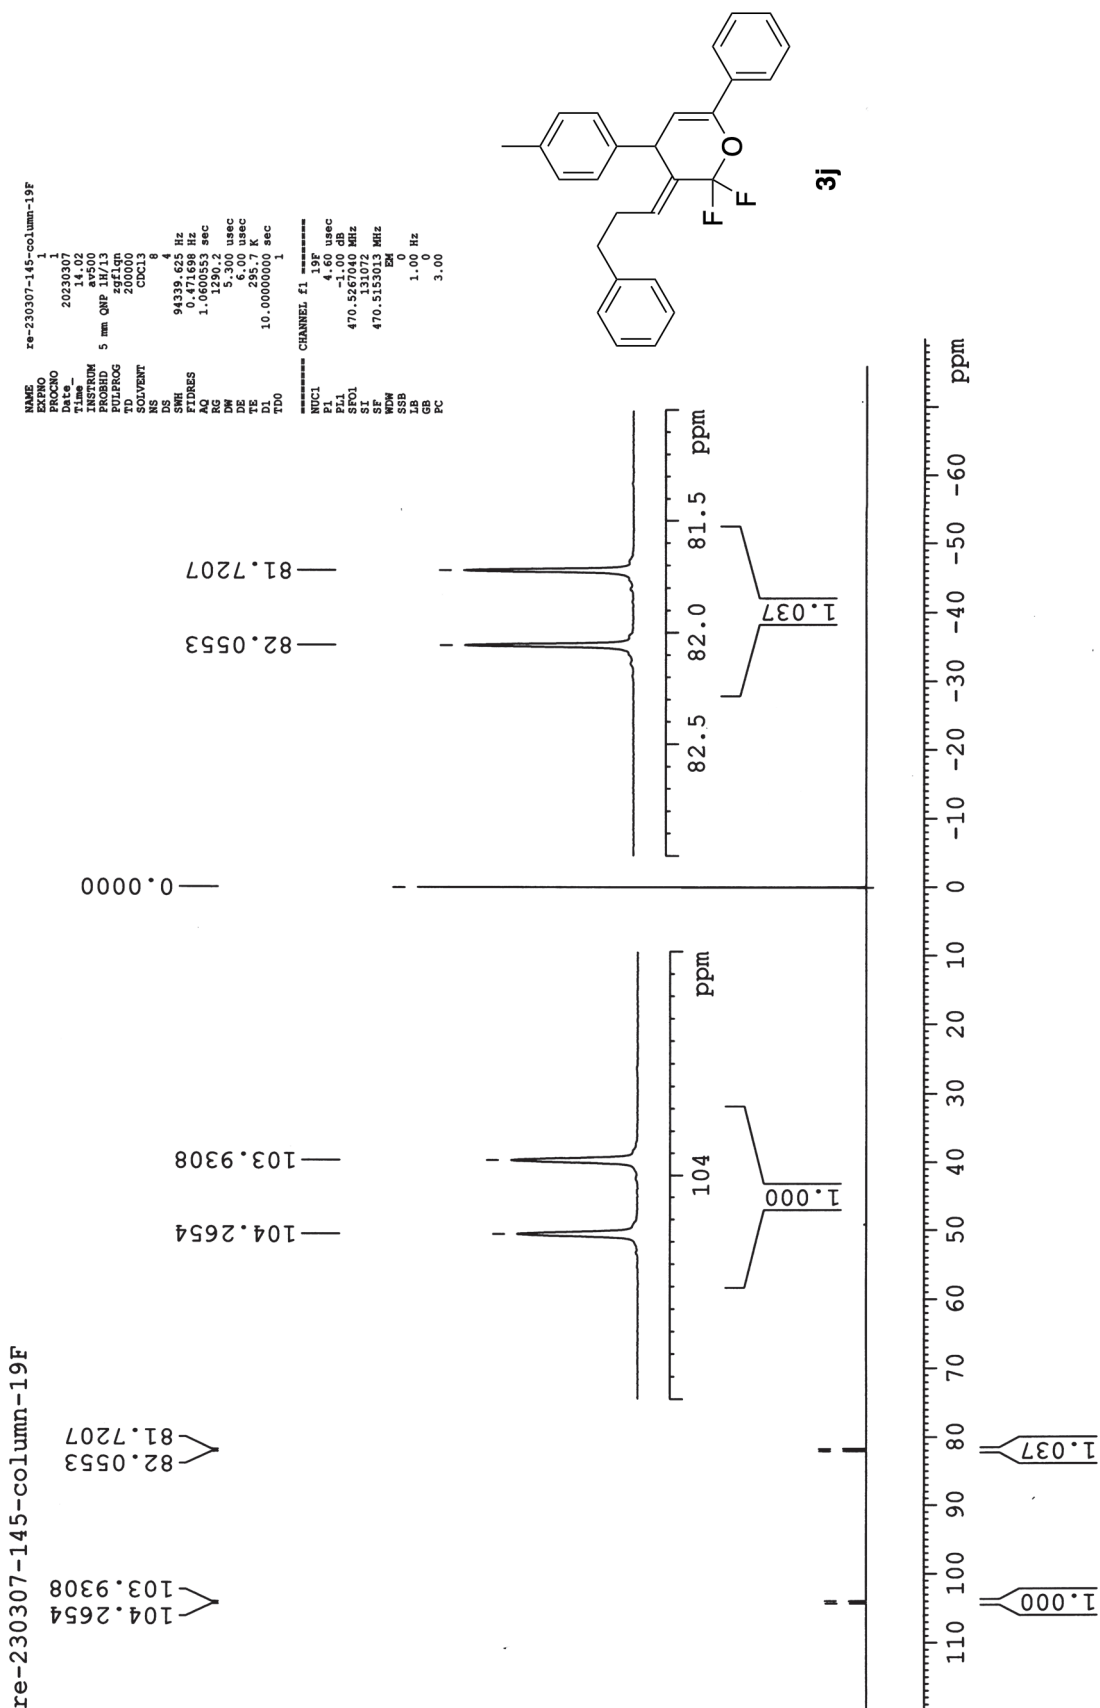

<sup>1</sup>H NMR Spectrum of (*E*)-4-(4-Chlorophenyl)-2,2-difluoro-6-phenyl-3-(3-phenylpropan-1-ylidene)-3,4-dihydro-2*H*-pyran **3k**

re-230515-164-column-1H

```

NAME re-230515-164-column-1H
EXPNO 1
PROCNO 1
Date_ 20230515
Time 11:00
INSTRUM av500
PROBHD 5 mm QNP 1H/13
PULPROG zgpg30
SOLVENT CDCl3
NS 8
DS 2
AQ 7507.502 Hz
FIDRES 0.114555 Hz
AQ 4.3648143 sec
RG 32
RG 66.32
DE 6.00 usec
TE 295.2 K
TD0 1.0000000 sec
===== CHANNEL f1 =====
NUC1 13C
P1 9.00 usec
PL1 -2.00 dB
SFO1 500.1322508 MHz
SI 32768
WDW EM
SSB 0
GB 0
PC 10.00
  
```

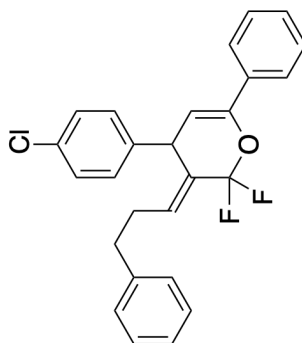

**3k**

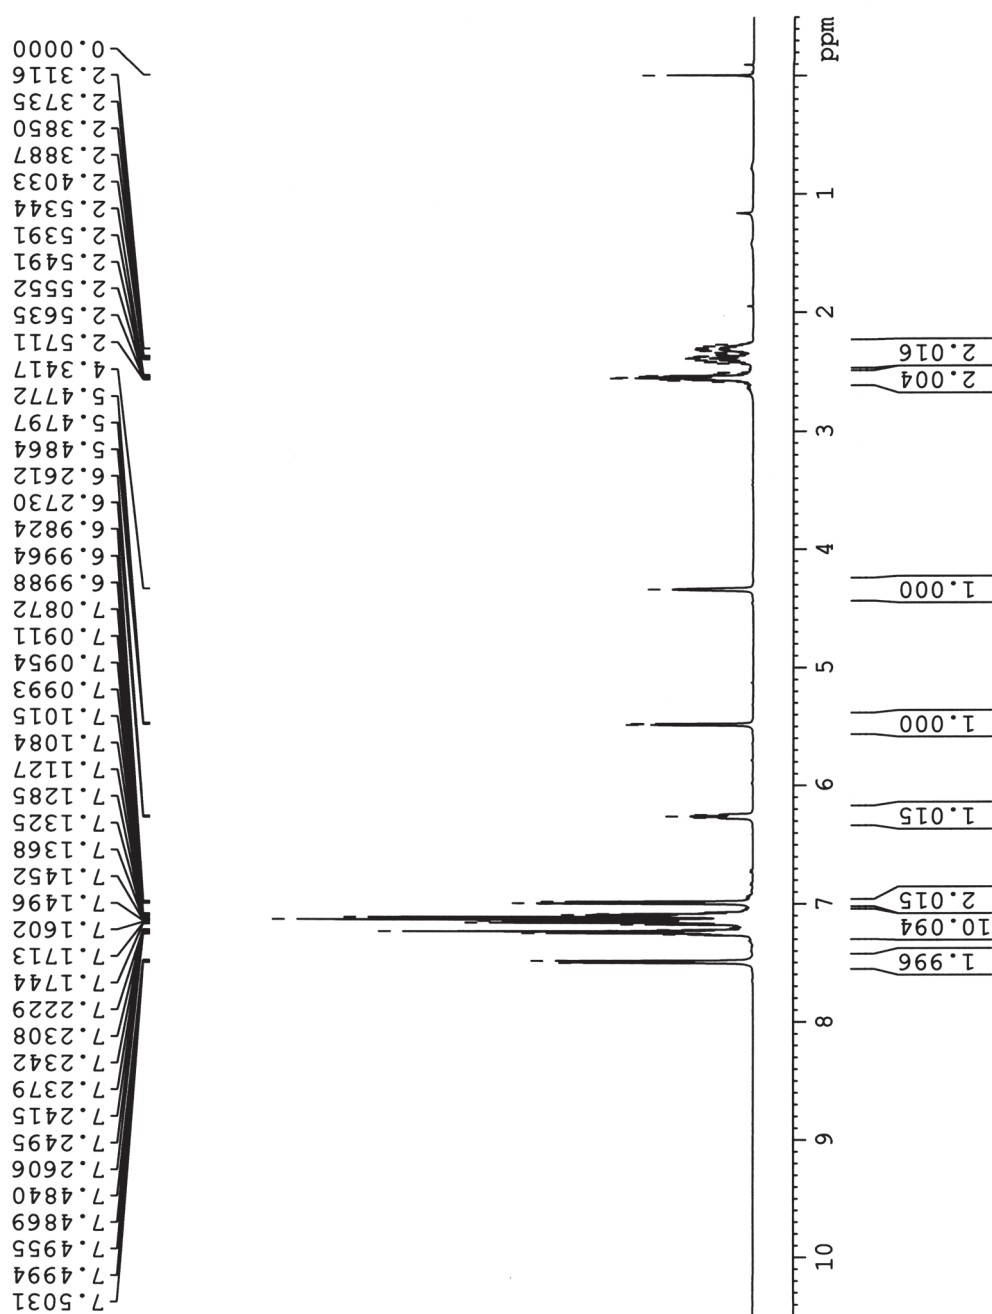

$^{13}\text{C}$  NMR Spectrum of (*E*)-4-(4-Chlorophenyl)-2,2-difluoro-6-phenyl-3-(3-phenylpropan-1-ylidene)-3,4-dihydro-2*H*-pyran **3k**

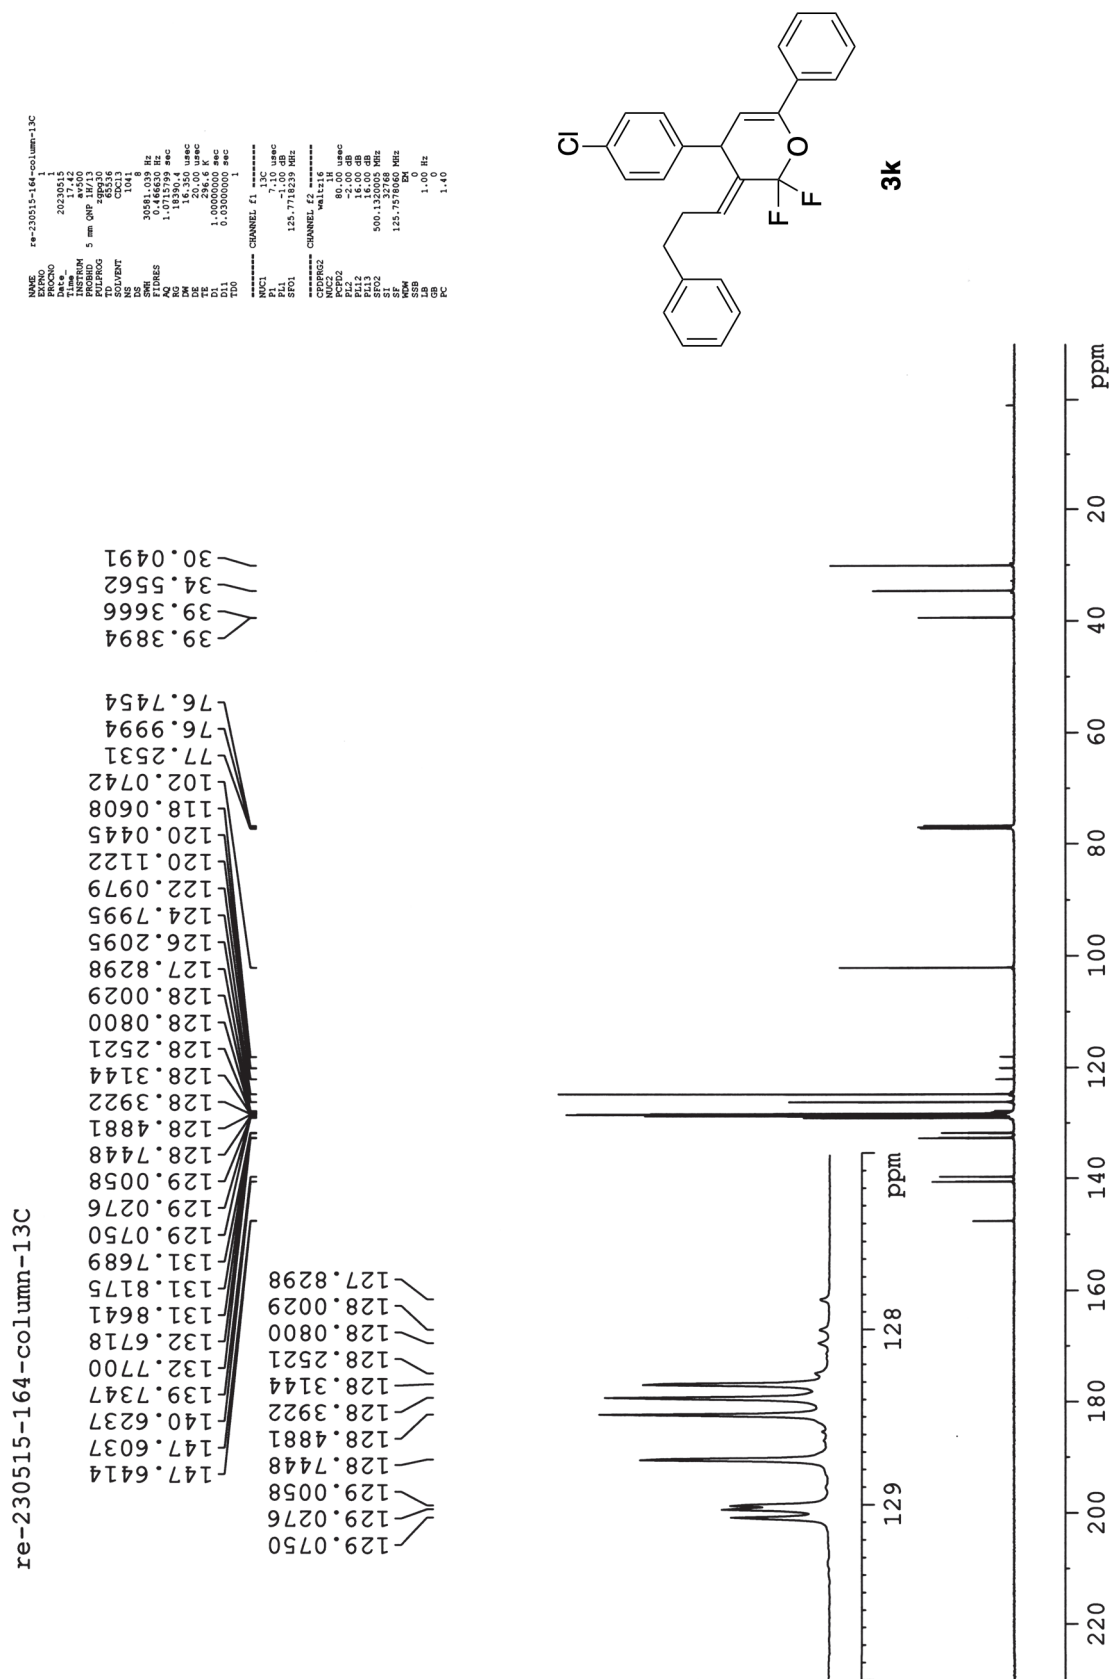

$^{19}\text{F}$  NMR Spectrum of (*E*)-4-(4-Chlorophenyl)-2,2-difluoro-6-phenyl-3-(3-phenylpropan-1-ylidene)-3,4-dihydro-2*H*-pyran **3k**

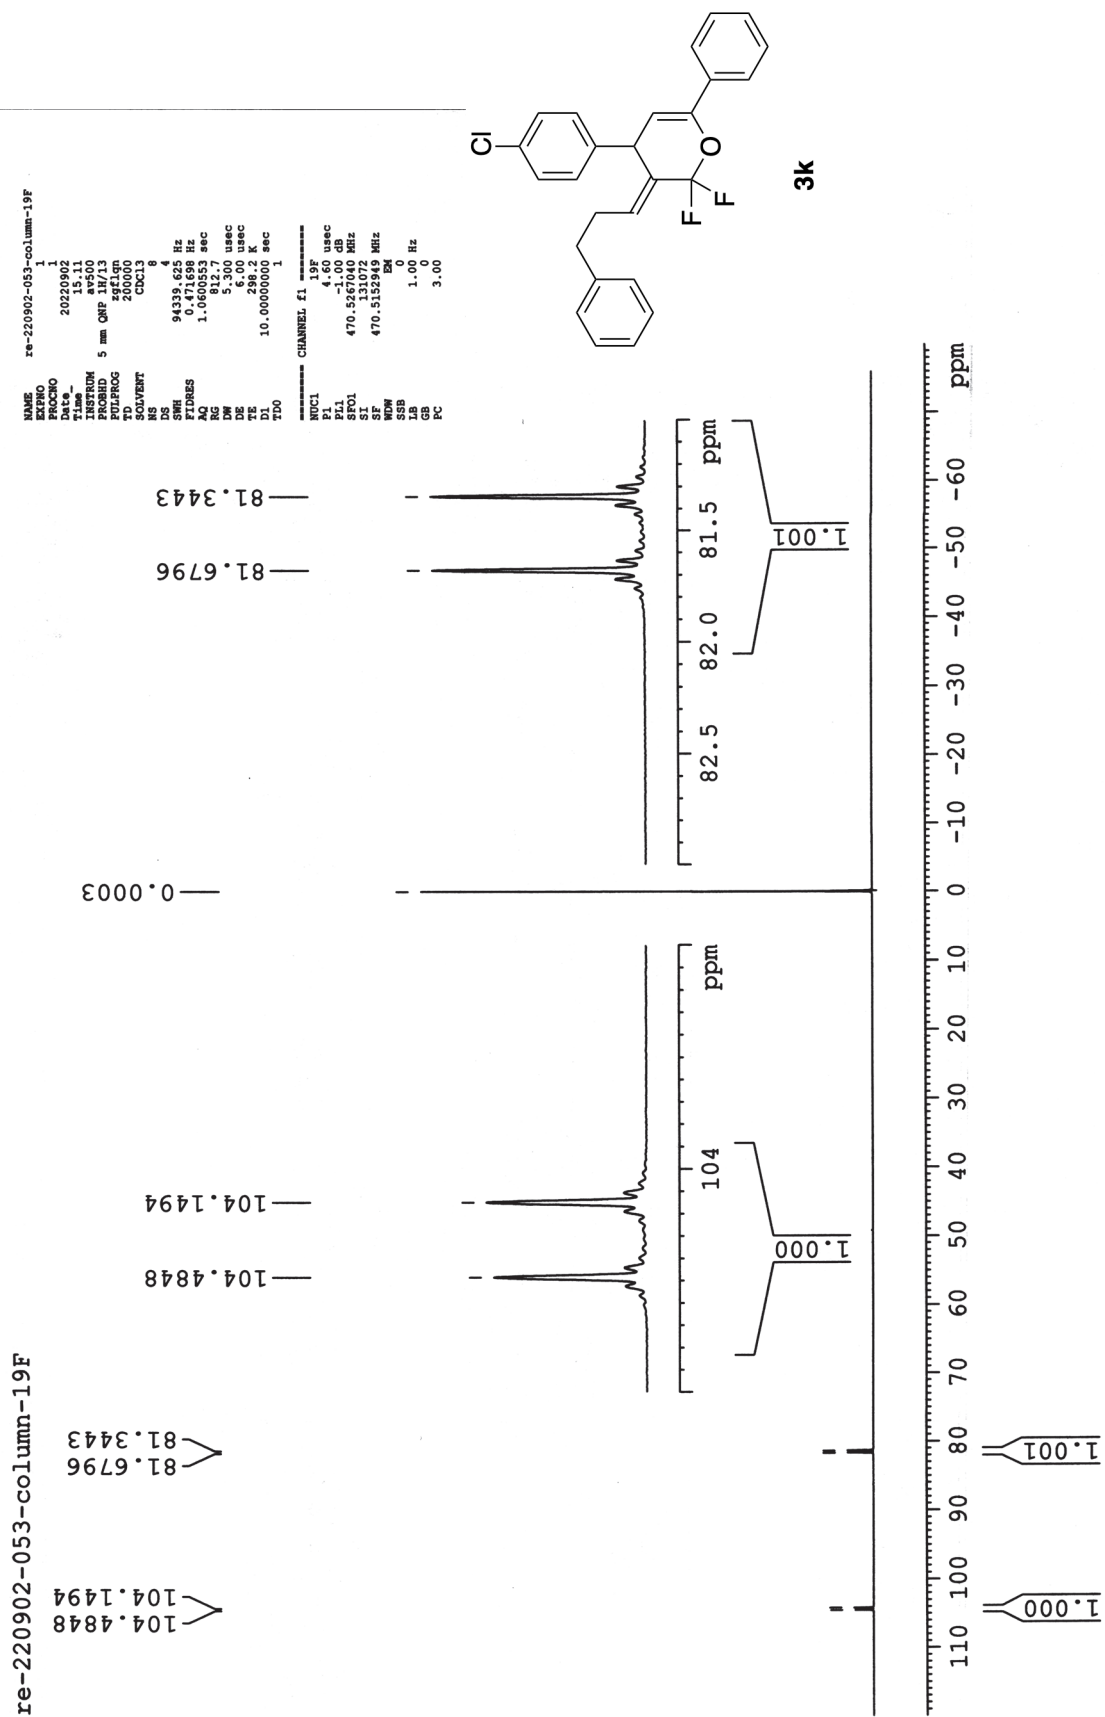

<sup>1</sup>H NMR Spectrum of (*E*)-2,2-Difluoro-4-(4-nitrophenyl)-6-phenyl-3-(3-phenylpropan-1-ylidene)-3,4-dihydro-2*H*-pyran **31**

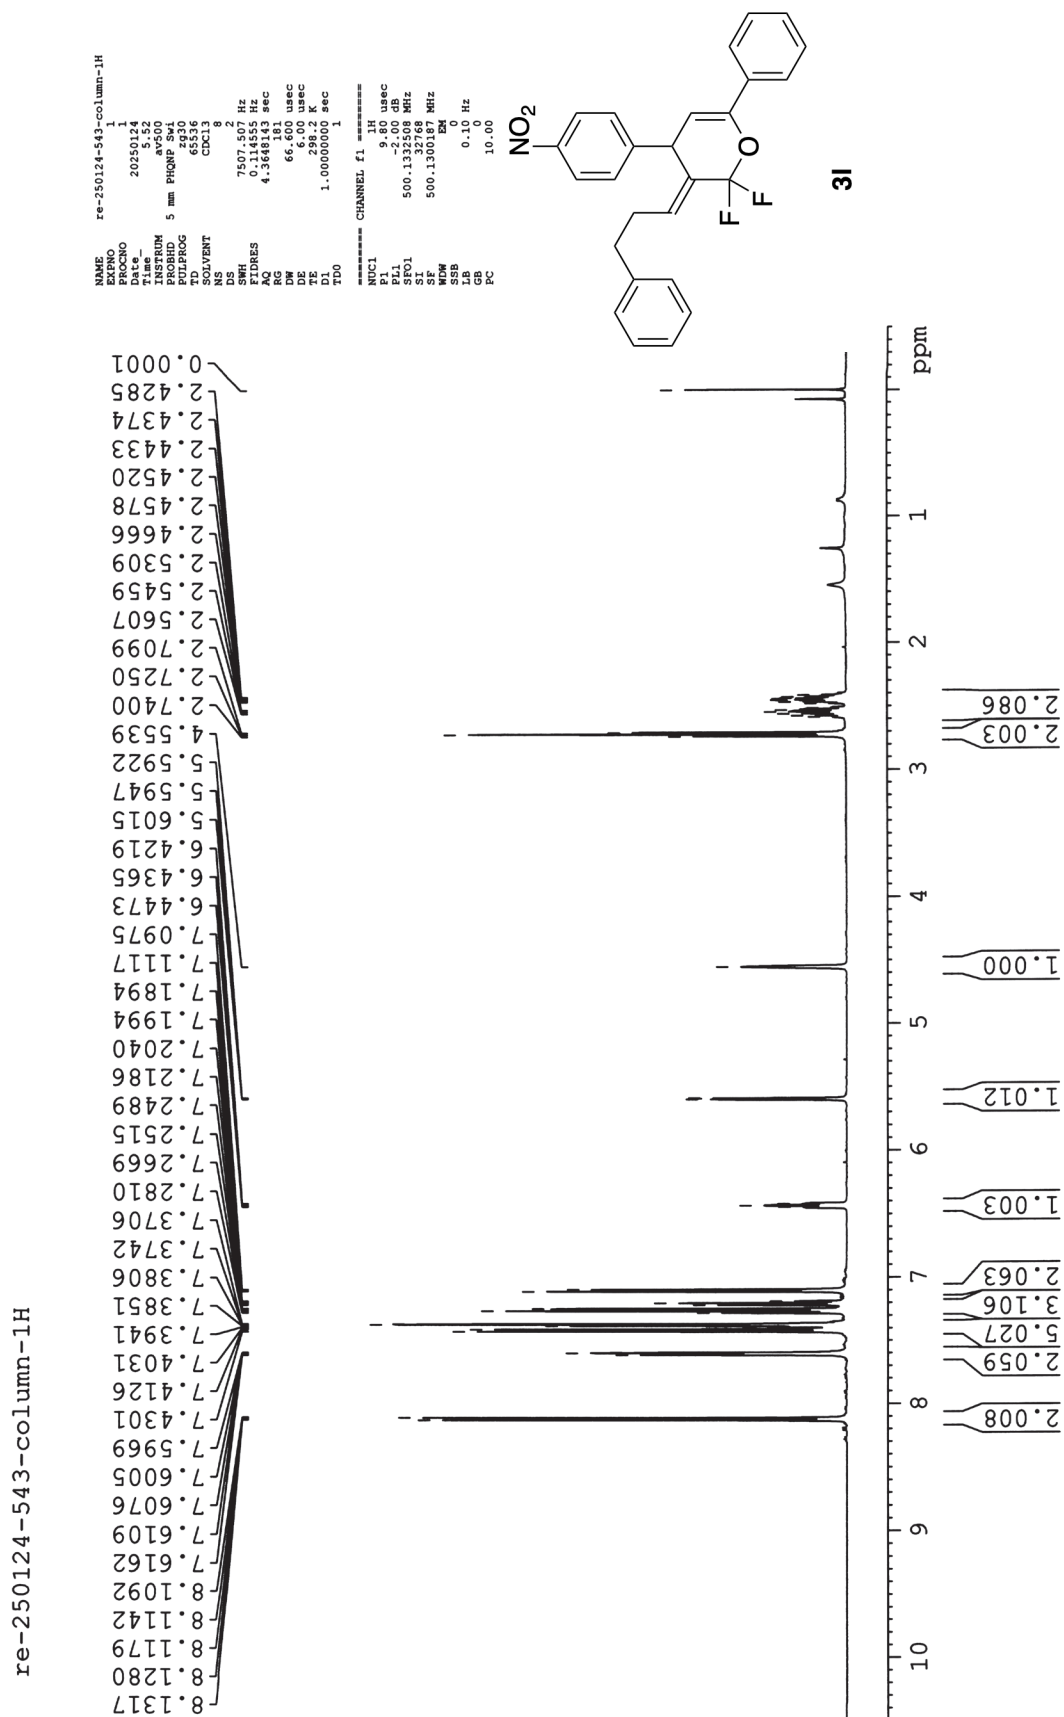





<sup>19</sup>F NMR Spectrum of (*E*)-2,2-Difluoro-4-(4-nitrophenyl)-6-phenyl-3-(3-phenylpropan-1-ylidene)-3,4-dihydro-2*H*-pyran **3I**

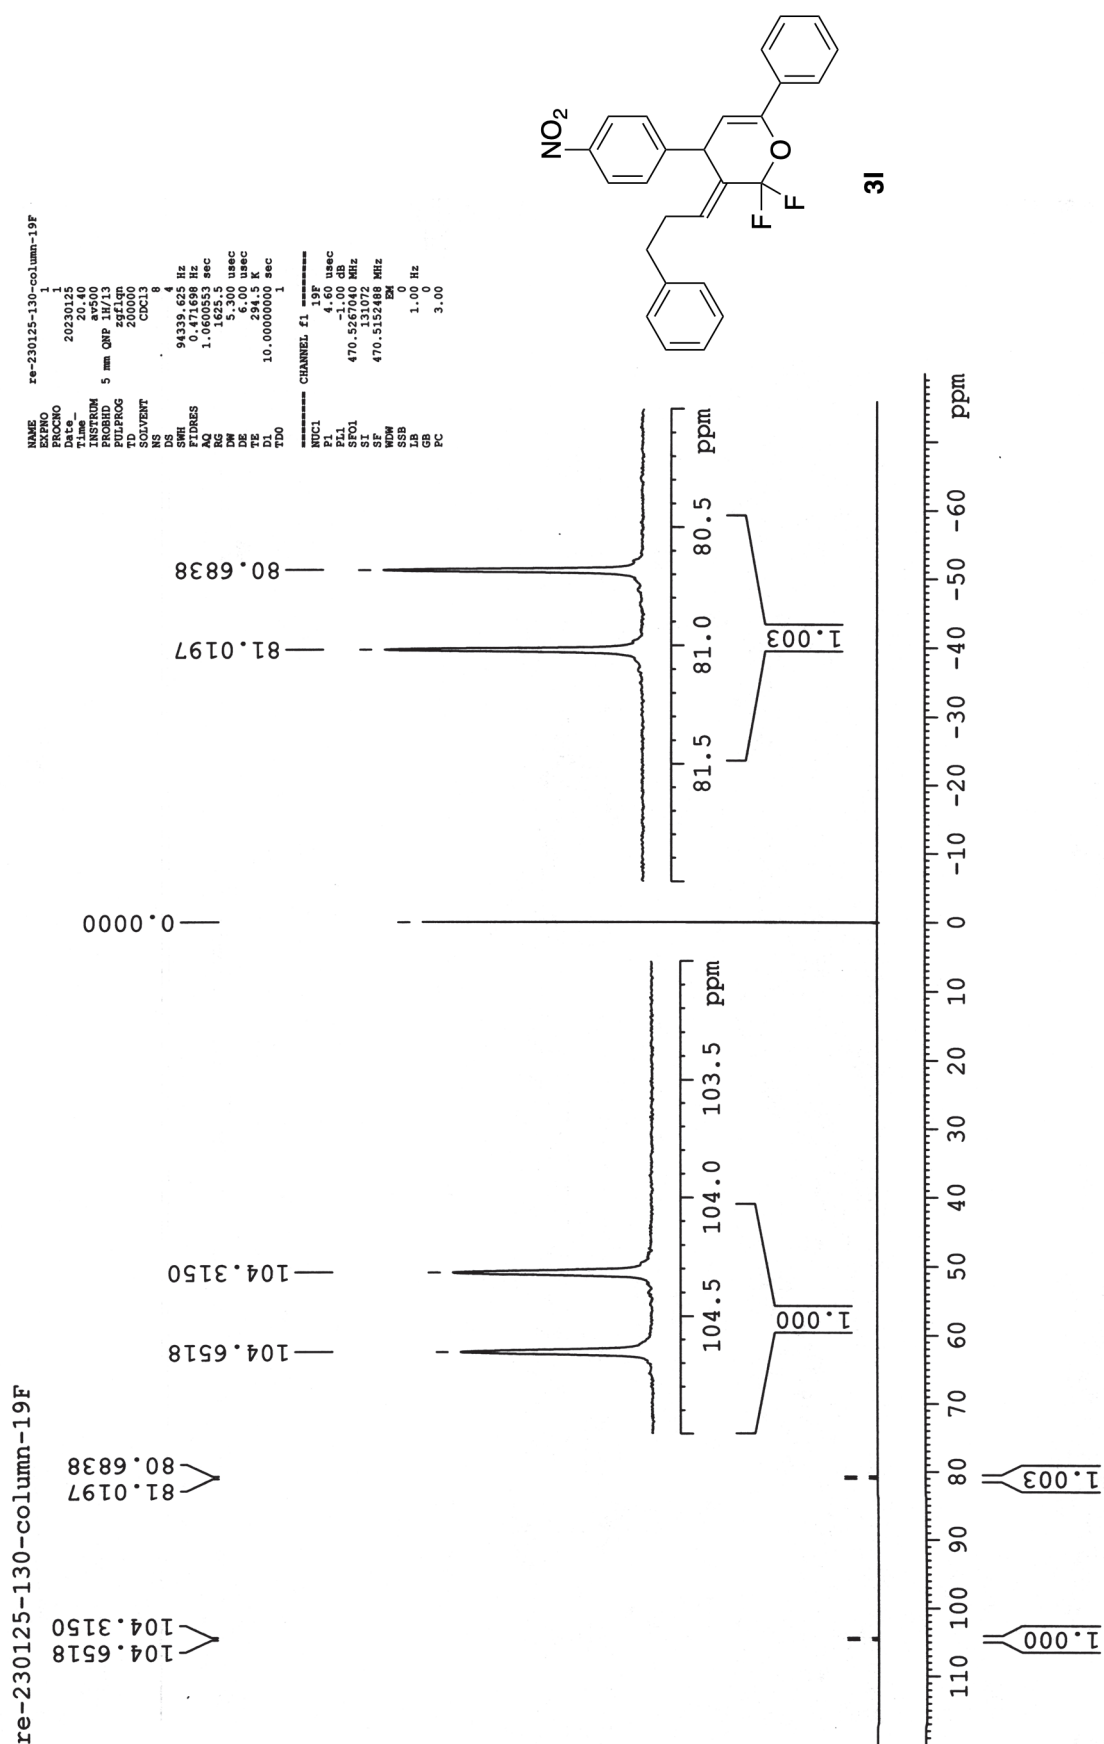

<sup>1</sup>H NMR Spectrum of (*E*)-2,2-Difluoro-6-phenyl-3-(3-phenylpropan-1-ylidene)-4-(2-thienyl)-3,4-dihydro-2*H*-pyran **3m**

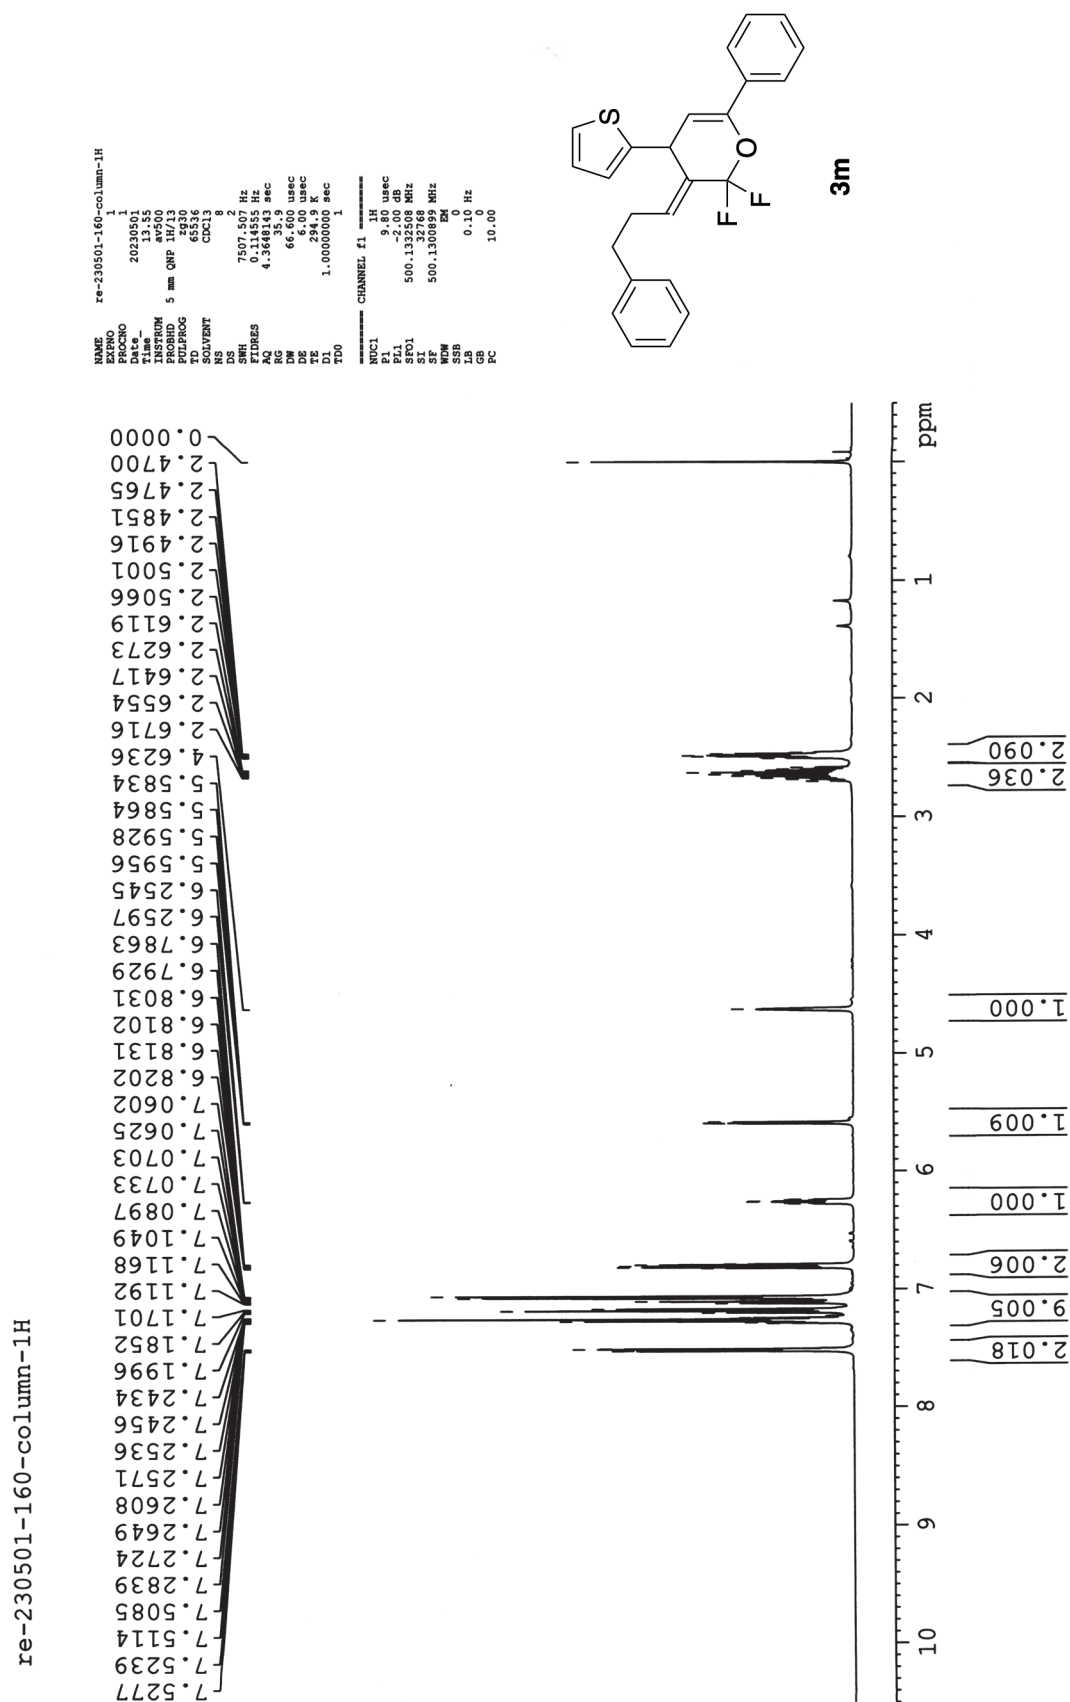



<sup>19</sup>F NMR Spectrum of (*E*)-2,2-Difluoro-6-phenyl-3-(3-phenylpropan-1-ylidene)-4-(2-thienyl)-3,4-dihydro-2*H*-pyran **3m**

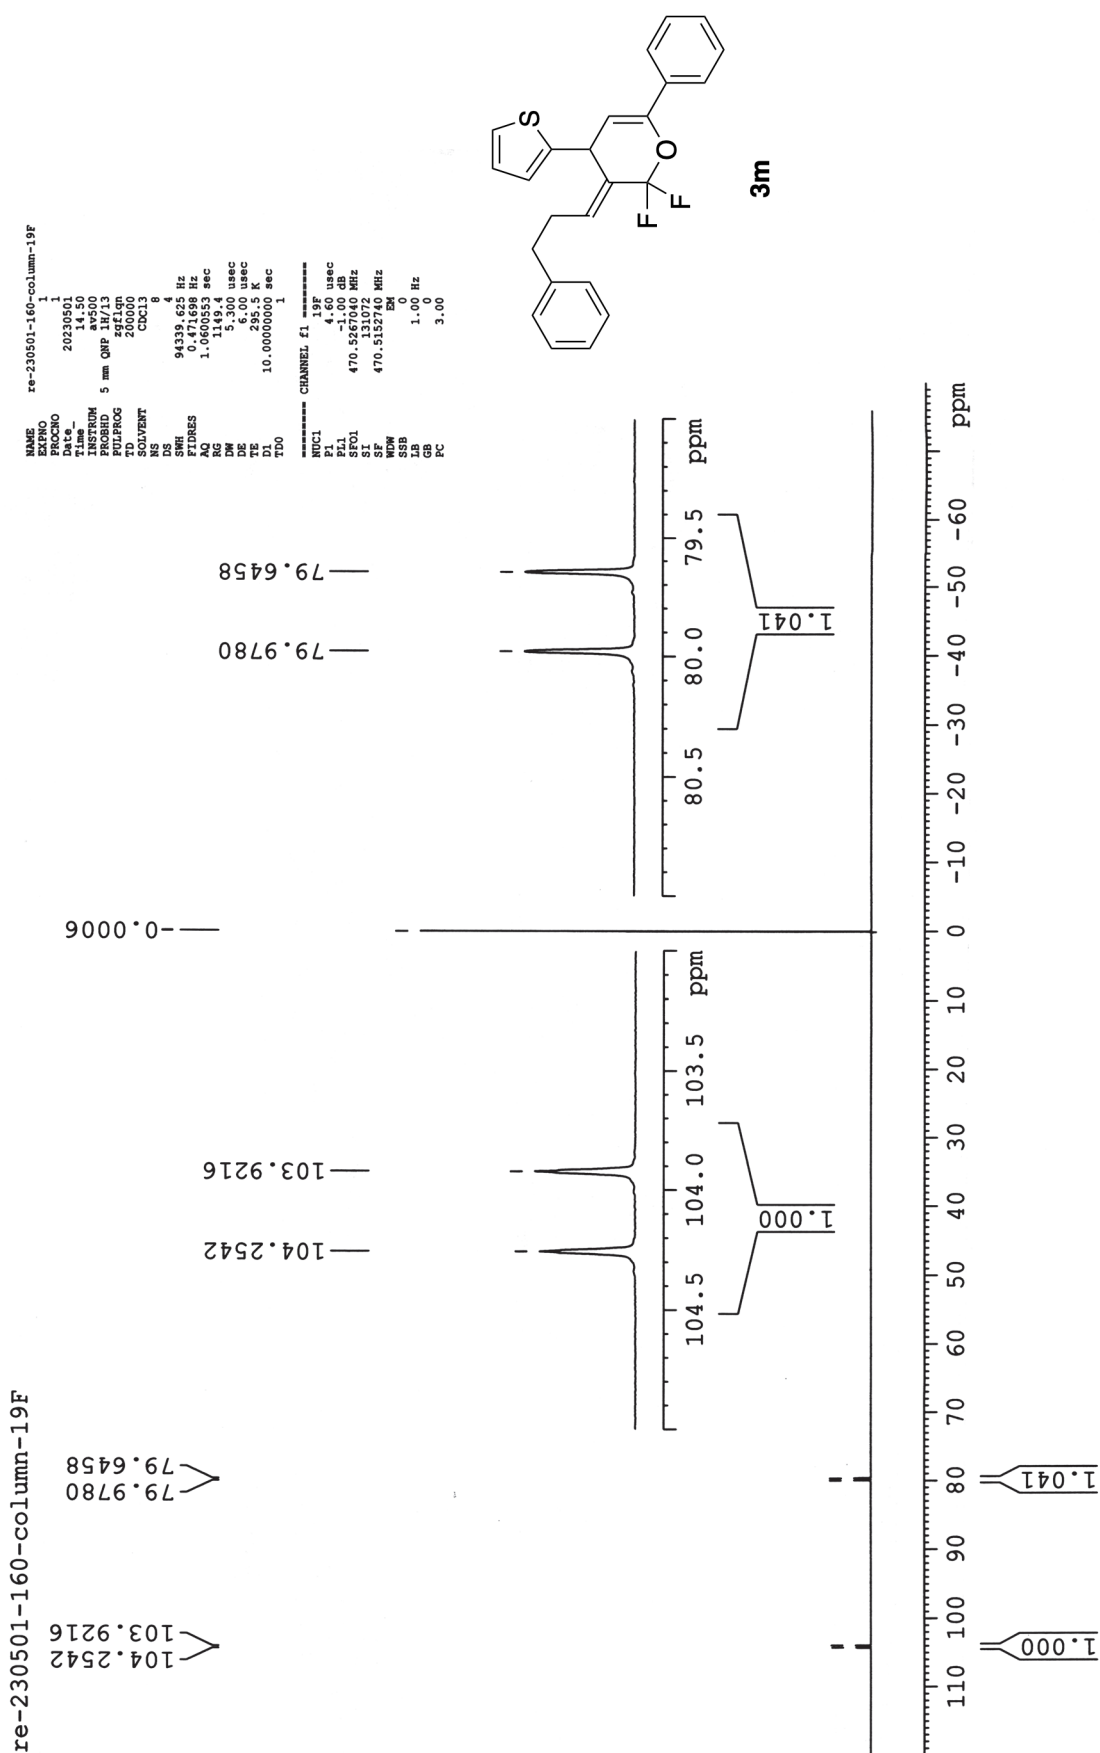

Supplement: d4cc06642a1.pdf [file d4cc06642a1.pdf]
